# Supplementary material for: Unraveling the Dual-Functionality of Chickpea Methyltransferases in Selenium Homeostasis and Stress Resilience
Source: Research Square preprint supplement (doi:10.21203/rs.3.rs-8305213/v1), 2026-02-17
Supplement: Supplementary file 1 [file 0a1ee9de4a6a3cd1cad08aea.xlsx]

## Sheet: Supplementary table 1
	Supplementary table 1. Physiochemical properties of 32 methyltransferase proteins with their average, minimum and maximum values.
Sequence ID	Number of Amino Acid	Molecular Weight	Theoretical pI	Instability Index	Aliphatic Index	Grand Average of Hydropathicity
NP_001351681.1	741	59513.1	5.15	31.79	27.94	0.738
XP_012573264.1	1344	108107	5	26.96	23.74	0.734
XP_012570542.1	666	53769.8	5.15	33.25	24.92	0.72
NP_001265927.1	852	69047.4	5.08	27.67	20.89	0.724
NP_001266141.1	687	54884.3	5.14	28.63	25.33	0.77
XP_004516997.1	2856	230417	4.87	32.01	30.46	0.803
XP_004516664.1	2004	161543	4.95	32.27	26.7	0.71
XP_004515598.1	1119	89572.1	5.07	25.55	26.45	0.7
XP_004515076.1	1116	89909.7	5.07	23.88	26.08	0.698
XP_004513963.1	756	61005.6	5.15	27.71	28.44	0.725
XP_004512683.1	810	64774.2	5.1	36.18	22.96	0.721
XP_004512086.1	978	79808.9	5.08	29.97	25.97	0.726
XP_004510156.1	972	78501.7	5.06	31.4	22.63	0.725
XP_004510052.1	1311	105236	5.01	28.85	24.33	0.746
XP_004510029.1	1191	96523.3	5.02	31.79	25.02	0.791
XP_004509259.1	774	62573.9	5.11	31.17	22.35	0.719
XP_004506744.1	750	61176.3	5.13	34.25	26.93	0.763
XP_004506058.1	912	72769.1	5.09	33.74	26.54	0.763
XP_004504753.1	687	55418.5	5.17	27.41	31	0.764
XP_004504712.1	1170	95902.4	5	36.14	23.33	0.823
XP_004504352.1	2307	185351	4.91	27.64	26.31	0.741
XP_004502631.1	1080	87838.3	5.05	31.78	26.57	0.783
XP_004499918.1	1020	82093.3	5.07	32.35	26.18	0.731
XP_004498868.1	1695	136340	4.98	27.25	26.55	0.71
XP_004493600.1	816	65703.5	5.12	34.91	31.25	0.847
XP_004492936.1	993	80344.2	5.08	29.77	24.87	0.692
XP_004491518.1	1593	128409	4.96	33.13	23.41	0.748
XP_004491318.1	1839	148229	4.93	28.41	23.76	0.765
XP_004489801.1	738	59191.7	5.13	31.4	23.85	0.691
XP_004488701.1	891	71177.9	5.1	27.3	23.79	0.687
XP_004489174.1	936	74893.2	5.09	30.22	25.21	0.716
XP_004485405.1	3279	266282	4.82	34.32	24.7	0.74
Average	1215.09	98009.6	5.05125	30.5969	25.5769	0.741063
Minmum	666	53769.8	4.82	23.88	20.89	0.687
Maximum	3279	266282	5.17	36.18	31.25	0.847

## Sheet: Supplementary Table 2
	Supplementary Table 2. Pfam domain analysis of 32 methyltransferases of chickpea with their start and end positions.
Sequence ID	START	END	DOMAIN
XP_004485405.1	709	1084	Aminotran_1_2
XP_004492936.1	9	204	LCM
XP_004515598.1	22	177	Methyltransferase
XP_004510052.1	157	376	Methyltransferase
XP_004491518.1	323	437	Methyltransferase
XP_004491518.1	331	528	Methyltransferase
XP_004491318.1	301	408	Methyltransferase
XP_004491318.1	458	607	Methyltransferase
XP_004510052.1	200	405	Methyltransferase
XP_004515598.1	65	163	Methyltransferase
XP_004515076.1	89	204	Methyltransferase
XP_004504352.1	70	173	Methyltransferase
XP_004502631.1	36	144	Methyltransferase
XP_004499918.1	99	197	Methyltransferase
XP_004498868.1	82	185	Methyltransferase
XP_004493600.1	124	201	Methyltransferase
XP_004489801.1	65	165	Methyltransferase
XP_004515076.1	89	202	Methyltransferase
XP_004502631.1	36	142	Methyltransferase
XP_004499918.1	99	195	Methyltransferase
XP_004498868.1	82	183	Methyltransferase
XP_004489801.1	65	163	Methyltransferase
XP_012570542.1	13	190	Methyltransferase
XP_004513963.1	52	230	Methyltransferase
XP_004512683.1	71	241	Methyltransferase
XP_004509259.1	49	230	Methyltransferase
XP_004506744.1	38	183	Methyltransferase
XP_004506058.1	18	197	Methyltransferase
XP_004498868.1	341	517	Methyltransferase
XP_004489174.1	100	285	Methyltransferase
XP_004498868.1	72	246	Methyltransferase
XP_012570542.1	44	204	Methyltransferase
XP_004510029.1	213	391	Methyltransferase
XP_004502631.1	12	237	Methyltransferase
XP_004499918.1	71	249	Methyltransferase
XP_004498868.1	34	240	Methyltransferase
XP_004489801.1	28	231	Methyltransferase
NP_001351681.1	84	191	Methyltransferase
XP_004504753.1	68	174	Methyltransferase
XP_004488701.1	141	248	Methyltransferase
XP_004515598.1	64	160	Methyltransferase
XP_004515076.1	88	200	Methyltransferase
XP_004510156.1	132	241	Methyltransferase
XP_004510052.1	264	364	Methyltransferase
XP_004504352.1	69	169	Methyltransferase
XP_004502631.1	35	140	Methyltransferase
XP_004499918.1	98	192	Methyltransferase
XP_004498868.1	81	181	Methyltransferase
XP_004489801.1	64	160	Methyltransferase
XP_012573264.1	108	371	Methyltransferase
XP_004504712.1	203	340	Methyltransferase
NP_001351681.1	34	246	Methyltransferase
XP_004504753.1	16	229	Methyltransferase
XP_004488701.1	94	297	Methyltransferase
NP_001266141.1	81	215	Methyltransferase
XP_004515076.1	82	246	Methyltransferase
XP_004510156.1	130	299	Methyltransferase
XP_004510052.1	258	421	Methyltransferase
XP_004510029.1	228	368	Methyltransferase
XP_004504352.1	65	235	Methyltransferase
XP_004502631.1	30	197	Methyltransferase
XP_004499918.1	92	252	Methyltransferase
XP_004498868.1	76	234	Methyltransferase
XP_004489801.1	59	223	Methyltransferase
XP_004516664.1	485	663	Methyltransferase
XP_004510156.1	128	308	Methyltransferase
XP_004493600.1	48	272	Methyltransferase
XP_004515598.1	45	162	Methyltransferase
XP_004510052.1	248	386	Methyltransferase
XP_004510029.1	208	297	Methyltransferase
XP_004498868.1	359	446	Methyltransferase
XP_004485405.1	109	187	Methyltransferase
XP_004499918.1	74	211	Methyltransferase
XP_004489801.1	17	245	Methyltransferase
XP_004516664.1	87	446	PGK
XP_004516997.1	229	284	PHD
XP_004516997.1	289	355	PHD
XP_004516997.1	356	422	PHD
XP_004515076.1	30	341	Pox_MCEL
XP_004502631.1	6	288	Pox_MCEL
NP_001266141.1	68	152	PrmA
XP_004515598.1	52	141	PrmA
XP_004510052.1	251	340	PrmA
XP_004510029.1	84	391	PrmA
XP_004485405.1	107	187	PrmA
NP_001265927.1	67	279	Protein-L-isoaspartate(D-aspartate) O-methyltransferase (PCMT)
NP_001266141.1	11	225	Protein-L-isoaspartate(D-aspartate) O-methyltransferase (PCMT)
XP_004489801.1	47	166	Protein-L-isoaspartate(D-aspartate) O-methyltransferase (PCMT)
XP_004510052.1	33	127	PUA
XP_004491318.1	171	277	PUA
XP_004499918.1	271	336	Sterol_MT_C

## Sheet: Supplementary Table 3
	Supplementary Table 3. Domain-motif overlap analysis of methyltransferases of chickpea after applying with their start and end positions.
Seq_id	Family	Motif_start	Motif_end	Domain_name	Domain_start	Domain_end
XP_004498868.1	ERF	220	230	Methyltransferase	72	246
XP_004498868.1	ERF	220	230	Methyltransferase	34	240
XP_004498868.1	ERF	220	230	Methyltransferase	76	234
XP_004504352.1	ERF	190	200	Methyltransferase	65	235
XP_004502631.1	ERF	121	130	Methyltransferase	36	144
XP_004502631.1	ERF	121	130	Methyltransferase	36	142
XP_004502631.1	ERF	121	130	Methyltransferase	12	237
XP_004502631.1	ERF	121	130	Methyltransferase	35	140
XP_004502631.1	ERF	121	130	Methyltransferase	30	197
XP_004489174.1	ERF	143	152	Methyltransferase	100	285
XP_004502631.1	ERF	120	127	Methyltransferase	36	144
XP_004502631.1	ERF	120	127	Methyltransferase	36	142
XP_004502631.1	ERF	120	127	Methyltransferase	12	237
XP_004502631.1	ERF	120	127	Methyltransferase	35	140
XP_004502631.1	ERF	120	127	Methyltransferase	30	197
XP_004502631.1	ERF	123	130	Methyltransferase	36	144
XP_004502631.1	ERF	123	130	Methyltransferase	36	142
XP_004502631.1	ERF	123	130	Methyltransferase	12	237
XP_004502631.1	ERF	123	130	Methyltransferase	35	140
XP_004502631.1	ERF	123	130	Methyltransferase	30	197
XP_004489174.1	ERF	143	150	Methyltransferase	100	285
XP_004489174.1	ERF	146	153	Methyltransferase	100	285
XP_004504352.1	ERF	191	198	Methyltransferase	65	235
XP_004510052.1	ERF	191	198	Methyltransferase	157	376
XP_004509259.1	ERF	209	216	Methyltransferase	49	230
XP_004498868.1	ERF	222	229	Methyltransferase	72	246
XP_004498868.1	ERF	222	229	Methyltransferase	34	240
XP_004498868.1	ERF	222	229	Methyltransferase	76	234
XP_004502631.1	ERF	124	131	Methyltransferase	36	144
XP_004502631.1	ERF	124	131	Methyltransferase	36	142
XP_004502631.1	ERF	124	131	Methyltransferase	12	237
XP_004502631.1	ERF	124	131	Methyltransferase	35	140
XP_004502631.1	ERF	124	131	Methyltransferase	30	197
XP_004502631.1	ERF	124	131	Methyltransferase	36	144
XP_004502631.1	ERF	124	131	Methyltransferase	36	142
XP_004502631.1	ERF	124	131	Methyltransferase	12	237
XP_004502631.1	ERF	124	131	Methyltransferase	35	140
XP_004502631.1	ERF	124	131	Methyltransferase	30	197
XP_004502631.1	ERF	120	127	Methyltransferase	36	144
XP_004502631.1	ERF	120	127	Methyltransferase	36	142
XP_004502631.1	ERF	120	127	Methyltransferase	12	237
XP_004502631.1	ERF	120	127	Methyltransferase	35	140
XP_004502631.1	ERF	120	127	Methyltransferase	30	197
XP_004502631.1	ERF	123	130	Methyltransferase	36	144
XP_004502631.1	ERF	123	130	Methyltransferase	36	142
XP_004502631.1	ERF	123	130	Methyltransferase	12	237
XP_004502631.1	ERF	123	130	Methyltransferase	35	140
XP_004502631.1	ERF	123	130	Methyltransferase	30	197
XP_004489174.1	ERF	143	150	Methyltransferase	100	285
XP_004489174.1	ERF	146	153	Methyltransferase	100	285
XP_004504352.1	ERF	191	198	Methyltransferase	65	235
XP_004510052.1	ERF	191	198	Methyltransferase	157	376
XP_004509259.1	ERF	209	216	Methyltransferase	49	230
XP_004498868.1	ERF	222	229	Methyltransferase	72	246
XP_004498868.1	ERF	222	229	Methyltransferase	34	240
XP_004498868.1	ERF	222	229	Methyltransferase	76	234
XP_004502631.1	ERF	121	128	Methyltransferase	36	144
XP_004502631.1	ERF	121	128	Methyltransferase	36	142
XP_004502631.1	ERF	121	128	Methyltransferase	12	237
XP_004502631.1	ERF	121	128	Methyltransferase	35	140
XP_004502631.1	ERF	121	128	Methyltransferase	30	197
XP_004489174.1	ERF	142	149	Methyltransferase	100	285
XP_004489174.1	ERF	145	152	Methyltransferase	100	285
XP_004504352.1	ERF	190	197	Methyltransferase	65	235
XP_004510052.1	ERF	190	197	Methyltransferase	157	376
XP_004498868.1	ERF	223	230	Methyltransferase	72	246
XP_004498868.1	ERF	223	230	Methyltransferase	34	240
XP_004498868.1	ERF	223	230	Methyltransferase	76	234
XP_004502631.1	ERF	121	128	Methyltransferase	36	144
XP_004502631.1	ERF	121	128	Methyltransferase	36	142
XP_004502631.1	ERF	121	128	Methyltransferase	12	237
XP_004502631.1	ERF	121	128	Methyltransferase	35	140
XP_004502631.1	ERF	121	128	Methyltransferase	30	197
XP_004489174.1	ERF	142	149	Methyltransferase	100	285
XP_004489174.1	ERF	145	152	Methyltransferase	100	285
XP_004504352.1	ERF	190	197	Methyltransferase	65	235
XP_004510052.1	ERF	190	197	Methyltransferase	157	376
XP_004498868.1	ERF	223	230	Methyltransferase	72	246
XP_004498868.1	ERF	223	230	Methyltransferase	34	240
XP_004498868.1	ERF	223	230	Methyltransferase	76	234
XP_004489801.1	ERF	208	217	Methyltransferase	28	231
XP_004489801.1	ERF	208	217	Methyltransferase	59	223
XP_004489801.1	ERF	208	217	Methyltransferase	17	245
NP_001266141.1	ERF	196	203	Methyltransferase	81	215
NP_001266141.1	ERF	196	203	Methyltransferase	81	215
XP_004491318.1	bHLH	595	604	Methyltransferase	458	607
XP_004509259.1	ERF	210	217	Methyltransferase	49	230
XP_004509259.1	ERF	210	217	Methyltransferase	49	230
XP_004515598.1	ERF	39	48	Methyltransferase	22	177
XP_004515598.1	ERF	39	48	Methyltransferase	45	162
XP_004515598.1	ERF	27	34	Methyltransferase	22	177
XP_004493600.1	ERF	174	181	Methyltransferase	124	201
XP_004493600.1	ERF	174	181	Methyltransferase	48	272
XP_004498868.1	ERF	225	232	Methyltransferase	72	246
XP_004498868.1	ERF	225	232	Methyltransferase	34	240
XP_004498868.1	ERF	225	232	Methyltransferase	76	234
XP_004493600.1	ERF	94	103	Methyltransferase	48	272
XP_004513963.1	ERF	163	172	Methyltransferase	52	230
XP_004502631.1	ERF	118	125	Methyltransferase	36	144
XP_004502631.1	ERF	118	125	Methyltransferase	36	142
XP_004502631.1	ERF	118	125	Methyltransferase	12	237
XP_004502631.1	ERF	118	125	Methyltransferase	35	140
XP_004502631.1	ERF	118	125	Methyltransferase	30	197
XP_004510052.1	ERF	369	376	Methyltransferase	157	376
XP_004510052.1	ERF	369	376	Methyltransferase	200	405
XP_004510052.1	ERF	369	376	Methyltransferase	258	421
XP_004510052.1	ERF	369	376	Methyltransferase	248	386
XP_004502631.1	ERF	118	125	Methyltransferase	36	144
XP_004502631.1	ERF	118	125	Methyltransferase	36	142
XP_004502631.1	ERF	118	125	Methyltransferase	12	237
XP_004502631.1	ERF	118	125	Methyltransferase	35	140
XP_004502631.1	ERF	118	125	Methyltransferase	30	197
XP_004510052.1	ERF	369	376	Methyltransferase	157	376
XP_004510052.1	ERF	369	376	Methyltransferase	200	405
XP_004510052.1	ERF	369	376	Methyltransferase	258	421
XP_004510052.1	ERF	369	376	Methyltransferase	248	386
XP_004512683.1	TCP	79	86	Methyltransferase	71	241
XP_004506058.1	TCP	103	110	Methyltransferase	18	197
XP_012573264.1	ERF	184	191	Methyltransferase	108	371
XP_012573264.1	ERF	184	191	Methyltransferase	108	371
XP_004502631.1	ERF	120	129	Methyltransferase	36	144
XP_004502631.1	ERF	120	129	Methyltransferase	36	142
XP_004502631.1	ERF	120	129	Methyltransferase	12	237
XP_004502631.1	ERF	120	129	Methyltransferase	35	140
XP_004502631.1	ERF	120	129	Methyltransferase	30	197
XP_004489174.1	ERF	144	153	Methyltransferase	100	285
XP_004498868.1	ERF	222	231	Methyltransferase	72	246
XP_004498868.1	ERF	222	231	Methyltransferase	34	240
XP_004498868.1	ERF	222	231	Methyltransferase	76	234
XP_004499918.1	ERF	90	97	Methyltransferase	71	249
XP_004499918.1	ERF	90	97	Methyltransferase	92	252
XP_004499918.1	ERF	90	97	Methyltransferase	74	211
XP_012573264.1	ERF	183	190	Methyltransferase	108	371
XP_004491318.1	bHLH	596	604	Methyltransferase	458	607
XP_004502631.1	ERF	121	130	Pox_MCEL	6	288
XP_004502631.1	ERF	120	127	Pox_MCEL	6	288
XP_004502631.1	ERF	123	130	Pox_MCEL	6	288
XP_004502631.1	ERF	124	131	Pox_MCEL	6	288
XP_004492936.1	ERF	171	178	LCM	9	204
XP_004502631.1	ERF	124	131	Pox_MCEL	6	288
XP_004492936.1	ERF	171	178	LCM	9	204
XP_004502631.1	ERF	120	127	Pox_MCEL	6	288
XP_004502631.1	ERF	123	130	Pox_MCEL	6	288
XP_004502631.1	ERF	121	128	Pox_MCEL	6	288
XP_004502631.1	ERF	121	128	Pox_MCEL	6	288
XP_004516664.1	ERF	145	154	PGK	87	446
NP_001266141.1	ERF	196	203	PCMT	11	225
NP_001266141.1	ERF	196	203	PCMT	11	225
XP_004485405.1	ERF	942	949	Aminotran_1_2	709	1084
XP_004485405.1	ERF	942	949	Aminotran_1_2	709	1084
XP_004516664.1	bHLH	163	172	PGK	87	446
XP_004515076.1	ERF	286	293	Pox_MCEL	30	341
XP_004515076.1	ERF	286	293	Pox_MCEL	30	341
XP_004492936.1	ERF	21	30	LCM	9	204
XP_004516664.1	ERF	145	155	PGK	87	446
XP_004515076.1	ERF	43	50	Pox_MCEL	30	341
XP_004502631.1	ERF	118	125	Pox_MCEL	6	288
XP_004515076.1	ERF	43	50	Pox_MCEL	30	341
XP_004502631.1	ERF	118	125	Pox_MCEL	6	288
XP_004492936.1	ERF	20	27	LCM	9	204
XP_004510029.1	ERF	206	213	PrmA	84	391
XP_004499918.1	ERF	316	323	Sterol_MT_C	271	336
XP_004499918.1	ERF	316	323	Sterol_MT_C	271	336
XP_004492936.1	ERF	21	31	LCM	9	204
XP_004502631.1	ERF	120	129	Pox_MCEL	6	288
XP_004502631.1	ERF	121	130	Pox_MCEL	6	288
XP_004510052.1	CAMTA	323	331	PrmA	251	340
XP_004485405.1	CAMTA	772	780	Aminotran_1_2	709	1084
XP_004502631.1	ERF	120	127	Pox_MCEL	6	288
XP_004502631.1	ERF	123	130	Pox_MCEL	6	288
XP_004502631.1	ERF	126	133	Pox_MCEL	6	288
XP_004502631.1	ERF	126	133	Pox_MCEL	6	288
XP_004499918.1	ERF	315	322	Sterol_MT_C	271	336
XP_004492936.1	FAR1	50	61	LCM	9	204
XP_004502631.1	ERF	117	124	Pox_MCEL	6	288
XP_004485405.1	ERF	941	948	Aminotran_1_2	709	1084
XP_004485405.1	ERF	835	842	Aminotran_1_2	709	1084
XP_004485405.1	ERF	835	842	Aminotran_1_2	709	1084
XP_004516664.1	bHLH	164	172	PGK	87	446
XP_004485405.1	ERF	1051	1058	Aminotran_1_2	709	1084
XP_004485405.1	ERF	1051	1058	Aminotran_1_2	709	1084
XP_004502631.1	ERF	187	196	Pox_MCEL	6	288
NP_001265927.1	ERF	61	68	PCMT	67	279
NP_001265927.1	ERF	61	68	PCMT	67	279
XP_004516664.1	ERF	147	154	PGK	87	446
XP_004502631.1	ERF	120	127	Pox_MCEL	6	288
XP_004502631.1	ERF	123	130	Pox_MCEL	6	288
XP_004492936.1	ERF	172	179	LCM	9	204
XP_004485405.1	ERF	943	950	Aminotran_1_2	709	1084
XP_004492936.1	ERF	172	179	LCM	9	204
XP_004485405.1	ERF	943	950	Aminotran_1_2	709	1084
XP_004510052.1	bHLH	323	330	PrmA	251	340
XP_004510052.1	bHLH	323	330	PrmA	251	340
XP_004485405.1	bHLH	772	779	Aminotran_1_2	709	1084
XP_004485405.1	bHLH	772	779	Aminotran_1_2	709	1084
NP_001266141.1	ERF	18	25	PCMT	11	225
XP_004492936.1	ERF	23	30	LCM	9	204
XP_004516664.1	ERF	147	154	PGK	87	446
XP_004510029.1	ERF	227	234	PrmA	84	391
XP_004516997.1	bZIP	229	239	PHD	229	284
XP_004499918.1	ERF	315	322	Sterol_MT_C	271	336
XP_004516664.1	CAMTA	256	264	PGK	87	446
XP_004502631.1	ERF	119	126	Pox_MCEL	6	288
XP_004502631.1	ERF	122	129	Pox_MCEL	6	288
XP_004485405.1	ERF	1052	1059	Aminotran_1_2	709	1084
XP_004502631.1	ERF	119	126	Pox_MCEL	6	288
XP_004502631.1	ERF	122	129	Pox_MCEL	6	288
XP_004485405.1	ERF	1052	1059	Aminotran_1_2	709	1084
XP_004485405.1	ERF	1050	1057	Aminotran_1_2	709	1084
XP_004492936.1	ERF	21	30	LCM	9	204
XP_004510052.1	bHLH	323	330	PrmA	251	340
XP_004510052.1	bHLH	323	330	PrmA	251	340
XP_004485405.1	bHLH	772	779	Aminotran_1_2	709	1084
XP_004485405.1	bHLH	772	779	Aminotran_1_2	709	1084
XP_004499918.1	TCP	317	325	Sterol_MT_C	271	336
XP_004516664.1	bZIP	163	172	PGK	87	446
XP_004515076.1	CAMTA	55	63	Pox_MCEL	30	341
XP_004516997.1	CAMTA	283	291	PHD	229	284
XP_004516997.1	CAMTA	283	291	PHD	289	355
XP_004485405.1	ERF	1053	1060	Aminotran_1_2	709	1084
XP_004485405.1	ERF	1000	1009	Aminotran_1_2	709	1084
XP_004510029.1	ERF	95	102	PrmA	84	391
XP_004510029.1	ERF	95	102	PrmA	84	391
XP_004492936.1	ERF	173	180	LCM	9	204
XP_004492936.1	ERF	173	180	LCM	9	204
XP_004485405.1	ERF	944	951	Aminotran_1_2	709	1084
XP_004485405.1	ERF	944	951	Aminotran_1_2	709	1084
XP_004516997.1	TCP	421	428	PHD	356	422
NP_001266141.1	ERF	197	204	PCMT	11	225
XP_004491318.1	ERF	210	217	PUA	171	277
XP_004485405.1	ERF	1053	1060	Aminotran_1_2	709	1084
XP_004485405.1	ERF	1000	1009	Aminotran_1_2	709	1084
XP_004492936.1	ERF	23	30	LCM	9	204
XP_004485405.1	ERF	774	783	Aminotran_1_2	709	1084
XP_004485405.1	ERF	774	783	Aminotran_1_2	709	1084
XP_004492936.1	ERF	20	27	LCM	9	204
XP_004510029.1	ERF	206	213	PrmA	84	391
XP_004516997.1	TCP	421	428	PHD	356	422
XP_004492936.1	ERF	21	28	LCM	9	204
XP_004492936.1	ERF	21	28	LCM	9	204
XP_004510029.1	ERF	222	231	PrmA	84	391
XP_004491318.1	ERF	237	246	PUA	171	277
XP_004502631.1	CAMTA	125	133	Pox_MCEL	6	288
XP_004485405.1	ERF	1002	1009	Aminotran_1_2	709	1084
XP_004502631.1	ERF	14	21	Pox_MCEL	6	288
XP_004502631.1	ERF	117	124	Pox_MCEL	6	288
XP_004485405.1	ERF	941	948	Aminotran_1_2	709	1084
XP_004485405.1	ERF	1050	1057	Aminotran_1_2	709	1084
NP_001265927.1	ERF	60	67	PCMT	67	279
XP_004516664.1	ERF	148	155	PGK	87	446
XP_004485405.1	ERF	1003	1010	Aminotran_1_2	709	1084
NP_001265927.1	ERF	60	67	PCMT	67	279
XP_004516664.1	ERF	148	155	PGK	87	446
XP_004485405.1	ERF	1003	1010	Aminotran_1_2	709	1084
XP_004510052.1	bHLH	323	331	PrmA	251	340
XP_004485405.1	bHLH	772	780	Aminotran_1_2	709	1084
XP_004502631.1	ERF	125	132	Pox_MCEL	6	288
NP_001266141.1	ERF	195	202	PCMT	11	225
XP_004502631.1	ERF	125	132	Pox_MCEL	6	288
NP_001266141.1	ERF	195	202	PCMT	11	225
XP_004492936.1	ERF	24	31	LCM	9	204
XP_004492936.1	ERF	24	31	LCM	9	204
XP_004499918.1	ERF	304	311	Sterol_MT_C	271	336
XP_004499918.1	ERF	304	311	Sterol_MT_C	271	336
XP_004516664.1	bHLH	164	172	PGK	87	446
XP_004516997.1	ERF	220	229	PHD	229	284
XP_004510029.1	ERF	222	231	PrmA	84	391
XP_004491318.1	ERF	237	246	PUA	171	277
XP_004502631.1	ERF	65	72	Pox_MCEL	6	288
XP_004516664.1	CAMTA	253	261	PGK	87	446
XP_004516664.1	bHLH	255	263	PGK	87	446
XP_004485405.1	SBP	774	783	Aminotran_1_2	709	1084
XP_004516664.1	ERF	144	151	PGK	87	446
XP_004499918.1	ERF	303	310	Sterol_MT_C	271	336
XP_004485405.1	ERF	1002	1009	Aminotran_1_2	709	1084
XP_004515076.1	TCP	178	187	Pox_MCEL	30	341
XP_004516664.1	B3	377	385	PGK	87	446
XP_004510029.1	ERF	95	102	PrmA	84	391
XP_004492936.1	ERF	173	180	LCM	9	204
XP_004485405.1	ERF	944	951	Aminotran_1_2	709	1084
XP_004492936.1	ERF	21	28	LCM	9	204
XP_004515076.1	ERF	41	48	Pox_MCEL	30	341
XP_004516664.1	ERF	386	393	PGK	87	446
XP_004485405.1	ERF	835	842	Aminotran_1_2	709	1084
NP_001266141.1	B3	139	147	PrmA	68	152
NP_001266141.1	B3	139	147	PCMT	11	225
XP_004515076.1	ERF	255	264	Pox_MCEL	30	341
XP_004516997.1	ERF	225	232	PHD	229	284
NP_001265927.1	ERF	62	69	PCMT	67	279
XP_004515076.1	CAMTA	115	123	Pox_MCEL	30	341
XP_004492936.1	CAMTA	160	168	LCM	9	204
XP_004485405.1	ERF	838	845	Aminotran_1_2	709	1084
XP_004499918.1	ERF	306	313	Sterol_MT_C	271	336
NP_001265927.1	ERF	62	69	PCMT	67	279
NP_001266141.1	ERF	19	26	PCMT	11	225
XP_004510029.1	ERF	226	233	PrmA	84	391
NP_001266141.1	ERF	19	26	PCMT	11	225
XP_004510029.1	ERF	226	233	PrmA	84	391
XP_004516664.1	FAR1	253	264	PGK	87	446
NP_001266141.1	ERF	85	99	PrmA	68	152
NP_001266141.1	ERF	85	99	PCMT	11	225
NP_001265927.1	ERF	253	267	PCMT	67	279
XP_004516664.1	MYB	399	409	PGK	87	446
NP_001266141.1	ERF	197	204	PCMT	11	225
XP_004492936.1	ERF	20	27	LCM	9	204
XP_004510029.1	ERF	206	213	PrmA	84	391
XP_004492936.1	ERF	174	181	LCM	9	204
XP_004492936.1	ERF	174	181	LCM	9	204
XP_004499918.1	ERF	303	310	Sterol_MT_C	271	336
XP_004499918.1	SBP	315	324	Sterol_MT_C	271	336
XP_004485405.1	ERF	837	844	Aminotran_1_2	709	1084
XP_004485405.1	ERF	837	844	Aminotran_1_2	709	1084
XP_004516997.1	TCP	421	429	PHD	356	422
XP_004502631.1	ERF	126	133	Pox_MCEL	6	288
XP_004515076.1	ERF	287	294	Pox_MCEL	30	341
XP_004485405.1	ERF	1004	1011	Aminotran_1_2	709	1084
XP_004515076.1	ERF	287	294	Pox_MCEL	30	341
XP_004485405.1	ERF	1004	1011	Aminotran_1_2	709	1084
XP_004510029.1	MYB	220	230	PrmA	84	391
XP_004491318.1	MYB	235	245	PUA	171	277
XP_004510029.1	ERF	207	214	PrmA	84	391
XP_004510029.1	ERF	207	214	PrmA	84	391
XP_004499918.1	TCP	268	277	Sterol_MT_C	271	336
XP_004485405.1	TCP	760	769	Aminotran_1_2	709	1084
XP_004492936.1	ERF	21	30	LCM	9	204
XP_004499918.1	TCP	318	325	Sterol_MT_C	271	336
XP_004499918.1	TCP	316	323	Sterol_MT_C	271	336
XP_004516997.1	ERF	225	232	PHD	229	284
NP_001266141.1	ERF	18	27	PCMT	11	225
XP_004510029.1	ERF	225	234	PrmA	84	391
XP_004491318.1	CAMTA	239	247	PUA	171	277
XP_004515076.1	ERF	41	48	Pox_MCEL	30	341
XP_004510029.1	ERF	207	214	PrmA	84	391

## Sheet: Supplementary Table 4
	Supplementary Table 4. (a) start and end positions of all 32 methyltransferase genes on chickpea chromosome, (b) Sizes (in base pairs) of the 8 chromosomes of the chickpea genome, along with Pltd and scaffold sizes.
	Chromosome	Start position	End position			Chromosome	Size (bp)
NP_001351681.1	CHR 6	18579869	18581326
XP_012573264.1	CHR 6	58982281	58986109			CHR 1	48359943
XP_012570542.1	CHR 1	12877422	12879903			CHR 2	36634854
NP_001265927.1	CHR 5	38786969	38790462			CHR 3	39989001
NP_001266141.1	Scaffold	1089719	1092020			CHR 4	49191682
XP_004516997.1	Scaffold	45459	52647			CHR 5	48169137
XP_004516664.1	Scaffold	44237	51823			CHR 6	59463898
XP_004515598.1	Scaffold	44754	49319			CHR 7	48961560
XP_004515076.1	Scaffold	178037	184990			CHR 8	16477302
XP_004513963.1	Scaffold	620086	625513			Pltd	125319
XP_004512683.1	CHR 8	10792822	10796878			Scaffold	1102020
XP_004512086.1	CHR 8	5454871	5456743
XP_004510156.1	CHR 7	29124986	29128072
XP_004510052.1	CHR 7	27866008	27872274
XP_004510029.1	CHR 7	26659200	26691045
XP_004509259.1	CHR 7	13759822	13760989
XP_004506744.1	CHR 6	47223300	47232976
XP_004506058.1	CHR 6	28990121	28994644
XP_004504753.1	CHR 6	14427219	14428722
XP_004504712.1	CHR 6	14105984	14109351
XP_004504352.1	CHR 6	10476528	10486061
XP_004502631.1	CHR 5	45221555	45227647
XP_004499918.1	CHR 5	17409435	17426543
XP_004498868.1	CHR 4	44866718	44871837
XP_004493600.1	CHR 3	30100916	30104530
XP_004492936.1	CHR 3	24914506	24924075
XP_004491518.1	CHR 2	35592916	35599154
XP_004491318.1	CHR 2	34175513	34182629
XP_004489801.1	CHR 2	8088629	8091169
XP_004488701.1	CHR 1	41325158	41329179
XP_004489174.1	CHR 2	1410993	1414736
XP_004485405.1	CHR 1	66824	81547

## Sheet: Supplementary Table 5
	Supplementary Table 5.Cis-regulatory elements of methyltransferase genes showing motif sequences and their positions within −1000 bp to +200 bp promoter regions.
Protein	Element	Motif	Start	End	Size	Strand	Plant	Role
XP_004510156.1	G-box	CCACGTAA	1088	1096	8	-	Brassica napus	cis-acting regulatory element involved in light responsiveness
XP_004510156.1	G-box	TACGTG	1089	1095	6	+	Arabidopsis thaliana	cis-acting regulatory element involved in light responsiveness
XP_004510156.1	TC-rich repeats	ATTCTCTAAC	708	717	9	+	Nicotiana tabacum	cis-acting element involved in defense and stress responsiveness
XP_004510156.1	CGTCA-motif	CGTCA	1179	1184	5	-	Hordeum vulgare	cis-acting regulatory element involved in the MeJA-responsiveness
XP_004510156.1	circadian	CAAAGATATC	982	991	9	+	Lycopersicon esculentum	cis-acting regulatory element involved in circadian control
XP_004510156.1	Box 4	ATTAAT	59	65	6	+	Petroselinum crispum	part of a conserved DNA module involved in light responsiveness
XP_004510156.1	Box 4	ATTAAT	557	563	6	+	Petroselinum crispum	part of a conserved DNA module involved in light responsiveness
XP_004510156.1	Box 4	ATTAAT	865	871	6	-	Petroselinum crispum	part of a conserved DNA module involved in light responsiveness
XP_004510156.1	Box 4	ATTAAT	1010	1016	6	-	Petroselinum crispum	part of a conserved DNA module involved in light responsiveness
XP_004510156.1	ABRE	ACGTG	1090	1095	5	+	Arabidopsis thaliana	cis-acting element involved in the abscisic acid responsiveness
XP_004510156.1	ABRE	ACGTG	1138	1143	5	+	Arabidopsis thaliana	cis-acting element involved in the abscisic acid responsiveness
XP_004510156.1	TCA-element	TCAGAAGAGG	1150	1159	9	+	Brassica oleracea	cis-acting element involved in salicylic acid responsiveness
XP_004510156.1	TGACG-motif	TGACG	1179	1184	5	+	Hordeum vulgare	cis-acting regulatory element involved in the MeJA-responsiveness
XP_004515598.1	TGACG-motif	TGACG	58	63	5	+	Hordeum vulgare	cis-acting regulatory element involved in the MeJA-responsiveness
XP_004515598.1	TGACG-motif	TGACG	723	728	5	-	Hordeum vulgare	cis-acting regulatory element involved in the MeJA-responsiveness
XP_004515598.1	ARE	AAACCA	114	120	6	-	Zea mays	cis-acting regulatory element essential for the anaerobic induction
XP_004515598.1	GARE-motif	TCTGTTG	281	288	7	+	Brassica oleracea	gibberellin-responsive element
XP_004515598.1	ABRE	GCAACGTGTC	883	892	9	+	Hordeum vulgare	cis-acting element involved in the abscisic acid responsiveness
XP_004515598.1	CGTCA-motif	CGTCA	58	63	5	-	Hordeum vulgare	cis-acting regulatory element involved in the MeJA-responsiveness
XP_004515598.1	CGTCA-motif	CGTCA	723	728	5	+	Hordeum vulgare	cis-acting regulatory element involved in the MeJA-responsiveness
XP_004515598.1	GATA-motif	GATAGGA	276	283	7	-	Arabidopsis thaliana	part of a light responsive element
XP_004515598.1	GATA-motif	GATAGGA	361	368	7	-	Arabidopsis thaliana	part of a light responsive element
XP_004515598.1	GATA-motif	GATAGGA	366	373	7	-	Arabidopsis thaliana	part of a light responsive element
XP_004515598.1	GATA-motif	GATAGGA	447	454	7	-	Arabidopsis thaliana	part of a light responsive element
XP_004515598.1	GATA-motif	GATAGGA	547	554	7	+	Arabidopsis thaliana	part of a light responsive element
XP_004515598.1	TCT-motif	TCTTAC	671	677	6	+	Arabidopsis thaliana	part of a light responsive element
XP_004489174.1	ARE	AAACCA	920	926	6	-	Zea mays	cis-acting regulatory element essential for the anaerobic induction
XP_004489174.1	ARE	AAACCA	981	987	6	-	Zea mays	cis-acting regulatory element essential for the anaerobic induction
XP_004489174.1	TGACG-motif	TGACG	838	843	5	-	Hordeum vulgare	cis-acting regulatory element involved in the MeJA-responsiveness
XP_004489174.1	ABRE	ACGTG	794	799	5	+	Arabidopsis thaliana	cis-acting element involved in the abscisic acid responsiveness
XP_004489174.1	TC-rich repeats	ATTCTCTAAC	94	103	9	-	Nicotiana tabacum	cis-acting element involved in defense and stress responsiveness
XP_004489174.1	CGTCA-motif	CGTCA	838	843	5	+	Hordeum vulgare	cis-acting regulatory element involved in the MeJA-responsiveness
XP_004489174.1	GATA-motif	AAGATAAGATT	436	446	10	+	Arabidopsis thaliana	part of a light responsive element
XP_004489174.1	GATA-motif	AAGATAAGATT	595	605	10	-	Arabidopsis thaliana	part of a light responsive element
XP_004489174.1	Box 4	ATTAAT	482	488	6	+	Petroselinum crispum	part of a conserved DNA module involved in light responsiveness
XP_004489174.1	GT1-motif	GGTTAAT	720	727	7	+	Avena sativa	light responsive element
XP_004515076.1	ARE	AAACCA	879	885	6	+	Zea mays	cis-acting regulatory element essential for the anaerobic induction
XP_004515076.1	ATCT-motif	AATCTAATCC	1188	1197	9	+	Pisum sativum	part of a conserved DNA module involved in light responsiveness
XP_004515076.1	ABRE	ACGTG	39	44	5	+	Arabidopsis thaliana	cis-acting element involved in the abscisic acid responsiveness
XP_004515076.1	GT1-motif	GGTTAA	769	775	6	+	Arabidopsis thaliana	light responsive element
XP_004515076.1	Box 4	ATTAAT	79	85	6	+	Petroselinum crispum	part of a conserved DNA module involved in light responsiveness
XP_004515076.1	Box 4	ATTAAT	97	103	6	+	Petroselinum crispum	part of a conserved DNA module involved in light responsiveness
XP_004515076.1	Box 4	ATTAAT	812	818	6	-	Petroselinum crispum	part of a conserved DNA module involved in light responsiveness
XP_004515076.1	Box 4	ATTAAT	914	920	6	-	Petroselinum crispum	part of a conserved DNA module involved in light responsiveness
XP_004515076.1	TCT-motif	TCTTAC	145	151	6	+	Arabidopsis thaliana	part of a light responsive element
XP_004510029.1	TCA-element	CCATCTTTTT	531	540	9	+	Nicotiana tabacum	cis-acting element involved in salicylic acid responsiveness
XP_004510029.1	AT-rich element	ATAGAAATCAA	478	488	10	-	Glycine max	binding site of AT-rich DNA binding protein (ATBP-1)
XP_004510029.1	AT-rich element	ATAGAAATCAA	907	917	10	+	Glycine max	binding site of AT-rich DNA binding protein (ATBP-1)
XP_004510029.1	P-box	CCTTTTG	366	373	7	+	Oryza sativa	gibberellin-responsive element
XP_004510029.1	Box 4	ATTAAT	375	381	6	+	Petroselinum crispum	part of a conserved DNA module involved in light responsiveness
XP_004510029.1	Box 4	ATTAAT	1070	1076	6	-	Petroselinum crispum	part of a conserved DNA module involved in light responsiveness
XP_004510029.1	Box 4	ATTAAT	1106	1112	6	-	Petroselinum crispum	part of a conserved DNA module involved in light responsiveness
XP_004510029.1	Box 4	ATTAAT	1113	1119	6	-	Petroselinum crispum	part of a conserved DNA module involved in light responsiveness
XP_004510029.1	GT1-motif	GGTTAAT	42	49	7	+	Avena sativa	light responsive element
XP_004510029.1	GATA-motif	AAGGATAAGG	360	369	9	-	Solanum tuberosum	part of a light responsive element
XP_004510029.1	GATA-motif	AAGATAAGATT	862	872	10	-	Arabidopsis thaliana	part of a light responsive element
XP_004510029.1	ATCT-motif	AATCTAATCC	1022	1031	9	+	Pisum sativum	part of a conserved DNA module involved in light responsiveness
XP_004510029.1	ATCT-motif	AATCTAATCC	1048	1057	9	+	Pisum sativum	part of a conserved DNA module involved in light responsiveness
XP_004510029.1	O2-site	GATGA(C/T)(A/G)TG(A/G)	199	207	8	+	Zea mays	cis-acting regulatory element involved in zein metabolism regulation
XP_004510029.1	O2-site	GTTGACGTGA	626	635	9	-	Zea mays	cis-acting regulatory element involved in zein metabolism regulation
XP_004510029.1	AT1-motif	AATTATTTTTTATT	956	969	13	-	Solanum tuberosum	part of a light responsive module
XP_004512683.1	TCA-element	CCATCTTTTT	827	836	9	+	Nicotiana tabacum	cis-acting element involved in salicylic acid responsiveness
XP_004512683.1	TGACG-motif	TGACG	94	99	5	+	Hordeum vulgare	cis-acting regulatory element involved in the MeJA-responsiveness
XP_004512683.1	TGACG-motif	TGACG	660	665	5	+	Hordeum vulgare	cis-acting regulatory element involved in the MeJA-responsiveness
XP_004512683.1	G-box	CACGTC	661	667	6	-	Zea mays	cis-acting regulatory element involved in light responsiveness
XP_004512683.1	G-box	TACGTG	744	750	6	+	Arabidopsis thaliana	cis-acting regulatory element involved in light responsiveness
XP_004512683.1	ABRE	ACGTG	662	667	5	+	Arabidopsis thaliana	cis-acting element involved in the abscisic acid responsiveness
XP_004512683.1	ABRE	ACGTG	745	750	5	+	Arabidopsis thaliana	cis-acting element involved in the abscisic acid responsiveness
XP_004512683.1	CGTCA-motif	CGTCA	94	99	5	-	Hordeum vulgare	cis-acting regulatory element involved in the MeJA-responsiveness
XP_004512683.1	CGTCA-motif	CGTCA	660	665	5	-	Hordeum vulgare	cis-acting regulatory element involved in the MeJA-responsiveness
XP_004512683.1	MRE	AACCTAA	1104	1111	7	-	Petroselinum crispum	MYB binding site involved in light responsiveness
XP_004512683.1	Box 4	ATTAAT	571	577	6	+	Petroselinum crispum	part of a conserved DNA module involved in light responsiveness
XP_004512683.1	Box 4	ATTAAT	890	896	6	-	Petroselinum crispum	part of a conserved DNA module involved in light responsiveness
XP_004499918.1	ARE	AAACCA	1012	1018	6	-	Zea mays	cis-acting regulatory element essential for the anaerobic induction
XP_004499918.1	ARE	AAACCA	1116	1122	6	-	Zea mays	cis-acting regulatory element essential for the anaerobic induction
XP_004499918.1	TCA-element	CCATCTTTTT	501	510	9	-	Nicotiana tabacum	cis-acting element involved in salicylic acid responsiveness
XP_004499918.1	TCA-element	CCATCTTTTT	929	938	9	-	Nicotiana tabacum	cis-acting element involved in salicylic acid responsiveness
XP_004499918.1	Box 4	ATTAAT	5	11	6	+	Petroselinum crispum	part of a conserved DNA module involved in light responsiveness
XP_004499918.1	Box 4	ATTAAT	194	200	6	+	Petroselinum crispum	part of a conserved DNA module involved in light responsiveness
XP_004499918.1	Box 4	ATTAAT	593	599	6	+	Petroselinum crispum	part of a conserved DNA module involved in light responsiveness
XP_004499918.1	Box 4	ATTAAT	975	981	6	-	Petroselinum crispum	part of a conserved DNA module involved in light responsiveness
XP_004499918.1	TCT-motif	TCTTAC	1171	1177	6	+	Arabidopsis thaliana	part of a light responsive element
XP_004499918.1	AuxRR-core	GGTCCAT	507	514	7	-	Nicotiana tabacum	cis-acting regulatory element involved in auxin responsiveness
XP_004499918.1	ATCT-motif	AATCTAATCC	220	229	9	+	Pisum sativum	part of a conserved DNA module involved in light responsiveness
XP_004498868.1	MRE	AACCTAA	585	592	7	-	Petroselinum crispum	MYB binding site involved in light responsiveness
XP_004498868.1	AE-box	AGAAACTT	74	82	8	-	Arabidopsis thaliana	part of a module for light response
XP_004498868.1	GCN4_motif	TGAGTCA	224	231	7	-	Oryza sativa	cis-regulatory element involved in endosperm expression
XP_004498868.1	TCA-element	CCATCTTTTT	967	976	9	-	Nicotiana tabacum	cis-acting element involved in salicylic acid responsiveness
XP_004498868.1	ABRE	ACGTG	112	117	5	+	Arabidopsis thaliana	cis-acting element involved in the abscisic acid responsiveness
XP_004498868.1	ABRE	ACGTG	317	322	5	-	Arabidopsis thaliana	cis-acting element involved in the abscisic acid responsiveness
XP_004498868.1	CAT-box	GCCACT	1124	1130	6	+	Arabidopsis thaliana	cis-acting regulatory element related to meristem expression
XP_004498868.1	P-box	CCTTTTG	1180	1187	7	+	Oryza sativa	gibberellin-responsive element
XP_004498868.1	ARE	AAACCA	917	923	6	+	Zea mays	cis-acting regulatory element essential for the anaerobic induction
XP_004498868.1	G-box	TACGTG	111	117	6	+	Arabidopsis thaliana	cis-acting regulatory element involved in light responsiveness
XP_004504712.1	TGA-box	TGACGTAA	465	473	8	+	Glycine max	part of an auxin-responsive element
XP_004504712.1	G-box	CACGTG	720	726	6	-	Arabidopsis thaliana	cis-acting regulatory element involved in light responsiveness
XP_004504712.1	G-box	TAACACGTAG	817	826	9	+	Brassica oleracea	cis-acting regulatory element involved in light responsiveness
XP_004504712.1	G-box	TACGTG	820	826	6	-	Arabidopsis thaliana	cis-acting regulatory element involved in light responsiveness
XP_004504712.1	CGTCA-motif	CGTCA	465	470	5	-	Hordeum vulgare	cis-acting regulatory element involved in the MeJA-responsiveness
XP_004504712.1	G-box	CACGTG	720	726	6	-	Arabidopsis thaliana	cis-acting regulatory element involved in light responsiveness
XP_004504712.1	O2-site	GTTGACGTGA	463	472	9	+	Zea mays	cis-acting regulatory element involved in zein metabolism regulation
XP_004504712.1	Box II	ACACGTAGA	819	828	9	+	Arabidopsis thaliana	part of a light responsive element
XP_004504712.1	GT1-motif	GGTTAA	630	636	6	-	Arabidopsis thaliana	light responsive element
XP_004504712.1	TCT-motif	TCTTAC	204	210	6	-	Arabidopsis thaliana	part of a light responsive element
XP_004504712.1	Box 4	ATTAAT	264	270	6	+	Petroselinum crispum	part of a conserved DNA module involved in light responsiveness
XP_004504712.1	Box 4	ATTAAT	401	407	6	+	Petroselinum crispum	part of a conserved DNA module involved in light responsiveness
XP_004504712.1	Box 4	ATTAAT	487	493	6	+	Petroselinum crispum	part of a conserved DNA module involved in light responsiveness
XP_004504712.1	Box 4	ATTAAT	622	628	6	-	Petroselinum crispum	part of a conserved DNA module involved in light responsiveness
XP_004504712.1	Box 4	ATTAAT	1128	1134	6	-	Petroselinum crispum	part of a conserved DNA module involved in light responsiveness
XP_004504712.1	Box 4	ATTAAT	1132	1138	6	-	Petroselinum crispum	part of a conserved DNA module involved in light responsiveness
XP_004504712.1	ABRE	CACGTG	720	726	6	-	Arabidopsis thaliana	cis-acting element involved in the abscisic acid responsiveness
XP_004504712.1	ABRE	ACGTG	721	726	5	+	Arabidopsis thaliana	cis-acting element involved in the abscisic acid responsiveness
XP_004504712.1	ABRE	ACGTG	820	825	5	-	Arabidopsis thaliana	cis-acting element involved in the abscisic acid responsiveness
XP_004504712.1	TGACG-motif	TGACG	465	470	5	+	Hordeum vulgare	cis-acting regulatory element involved in the MeJA-responsiveness
XP_004513963.1	TCT-motif	TCTTAC	459	465	6	-	Arabidopsis thaliana	part of a light responsive element
XP_004513963.1	MRE	AACCTAA	440	447	7	-	Petroselinum crispum	MYB binding site involved in light responsiveness
XP_004513963.1	MRE	AACCTAA	1080	1087	7	-	Petroselinum crispum	MYB binding site involved in light responsiveness
XP_004513963.1	Box 4	ATTAAT	980	986	6	-	Petroselinum crispum	part of a conserved DNA module involved in light responsiveness
XP_004513963.1	Box 4	ATTAAT	1179	1185	6	-	Petroselinum crispum	part of a conserved DNA module involved in light responsiveness
XP_004513963.1	GT1-motif	GGTTAAT	443	450	7	+	Avena sativa	light responsive element
XP_004513963.1	GT1-motif	GGTTAAT	486	493	7	+	Avena sativa	light responsive element
XP_004513963.1	GT1-motif	GGTTAAT	1083	1090	7	+	Avena sativa	light responsive element
XP_004513963.1	O2-site	GTTGACGTGA	1151	1160	9	-	Zea mays	cis-acting regulatory element involved in zein metabolism regulation
XP_004513963.1	LAMP-element	CTTTATCA	700	708	8	-	Pisum sativum	part of a light responsive element
XP_004513963.1	TCA-element	CCATCTTTTT	102	111	9	+	Nicotiana tabacum	cis-acting element involved in salicylic acid responsiveness
XP_004513963.1	TCA-element	CCATCTTTTT	327	336	9	+	Nicotiana tabacum	cis-acting element involved in salicylic acid responsiveness
XP_004513963.1	TGACG-motif	TGACG	338	343	5	+	Hordeum vulgare	cis-acting regulatory element involved in the MeJA-responsiveness
XP_004513963.1	TGACG-motif	TGACG	1109	1114	5	-	Hordeum vulgare	cis-acting regulatory element involved in the MeJA-responsiveness
XP_004513963.1	AT-rich element	ATAGAAATCAA	1138	1148	10	+	Glycine max	binding site of AT-rich DNA binding protein (ATBP-1)
XP_004513963.1	ABRE	ACGTG	1047	1052	5	-	Arabidopsis thaliana	cis-acting element involved in the abscisic acid responsiveness
XP_004513963.1	ATCT-motif	AATCTAATCC	765	774	9	-	Pisum sativum	part of a conserved DNA module involved in light responsiveness
XP_004513963.1	ARE	AAACCA	234	240	6	-	Zea mays	cis-acting regulatory element essential for the anaerobic induction
XP_004513963.1	ARE	AAACCA	902	908	6	-	Zea mays	cis-acting regulatory element essential for the anaerobic induction
XP_004513963.1	G-box	TACGTG	1047	1053	6	-	Arabidopsis thaliana	cis-acting regulatory element involved in light responsiveness
XP_004513963.1	TC-rich repeats	ATTCTCTAAC	416	425	9	+	Nicotiana tabacum	cis-acting element involved in defense and stress responsiveness
XP_004513963.1	TC-rich repeats	GTTTTCTTAC	459	468	9	-	Nicotiana tabacum	cis-acting element involved in defense and stress responsiveness
XP_004513963.1	CGTCA-motif	CGTCA	338	343	5	-	Hordeum vulgare	cis-acting regulatory element involved in the MeJA-responsiveness
XP_004513963.1	CGTCA-motif	CGTCA	1109	1114	5	+	Hordeum vulgare	cis-acting regulatory element involved in the MeJA-responsiveness
XP_004491318.1	ARE	AAACCA	15	21	6	-	Zea mays	cis-acting regulatory element essential for the anaerobic induction
XP_004491318.1	ARE	AAACCA	546	552	6	+	Zea mays	cis-acting regulatory element essential for the anaerobic induction
XP_004491318.1	ARE	AAACCA	762	768	6	+	Zea mays	cis-acting regulatory element essential for the anaerobic induction
XP_004491318.1	MBS	CAACTG	305	311	6	-	Arabidopsis thaliana	MYB binding site involved in drought-inducibility
XP_004491318.1	GATA-motif	GATAGGA	210	217	7	-	Arabidopsis thaliana	part of a light responsive element
XP_004491318.1	TCA-element	CCATCTTTTT	432	441	9	+	Nicotiana tabacum	cis-acting element involved in salicylic acid responsiveness
XP_004491318.1	Box 4	ATTAAT	169	175	6	+	Petroselinum crispum	part of a conserved DNA module involved in light responsiveness
XP_004491318.1	Box 4	ATTAAT	173	179	6	+	Petroselinum crispum	part of a conserved DNA module involved in light responsiveness
XP_004491318.1	TCT-motif	TCTTAC	62	68	6	-	Arabidopsis thaliana	part of a light responsive element
XP_004491318.1	AT1-motif	AATTATTTTTTATT	875	888	13	+	Solanum tuberosum	part of a light responsive module
XP_004510052.1	Box 4	ATTAAT	53	59	6	+	Petroselinum crispum	part of a conserved DNA module involved in light responsiveness
XP_004510052.1	Box 4	ATTAAT	462	468	6	+	Petroselinum crispum	part of a conserved DNA module involved in light responsiveness
XP_004510052.1	TCT-motif	TCTTAC	94	100	6	-	Arabidopsis thaliana	part of a light responsive element
XP_004510052.1	MRE	AACCTAA	39	46	7	-	Petroselinum crispum	MYB binding site involved in light responsiveness
XP_004510052.1	GT1-motif	GGTTAA	515	521	6	-	Arabidopsis thaliana	light responsive element
XP_004510052.1	AE-box	AGAAACAA	370	378	8	+	Arabidopsis thaliana	part of a module for light response
XP_004510052.1	LTR	CCGAAA	277	283	6	+	Hordeum vulgare	cis-acting element involved in low-temperature responsiveness
XP_004510052.1	O2-site	GATGACATGG	847	856	9	-	Zea mays	cis-acting regulatory element involved in zein metabolism regulation
XP_004510052.1	MBS	CAACTG	18	24	6	-	Arabidopsis thaliana	MYB binding site involved in drought-inducibility
XP_004510052.1	MBS	CAACTG	693	699	6	-	Arabidopsis thaliana	MYB binding site involved in drought-inducibility
XP_004510052.1	ATCT-motif	AATCTAATCC	36	45	9	-	Pisum sativum	part of a conserved DNA module involved in light responsiveness
XP_004510052.1	ARE	AAACCA	808	814	6	-	Zea mays	cis-acting regulatory element essential for the anaerobic induction
XP_004510052.1	TC-rich repeats	GTTTTCTTAC	23	32	9	-	Nicotiana tabacum	cis-acting element involved in defense and stress responsiveness
XP_004516664.1	ARE	AAACCA	313	319	6	-	Zea mays	cis-acting regulatory element essential for the anaerobic induction
XP_004516664.1	GARE-motif	TCTGTTG	442	449	7	-	Brassica oleracea	gibberellin-responsive element
XP_004516664.1	Gap-box	CAAATGAA(A/G)A	256	265	9	+	Arabidopsis thaliana	part of a light responsive element
XP_004516664.1	CGTCA-motif	CGTCA	961	966	5	+	Hordeum vulgare	cis-acting regulatory element involved in the MeJA-responsiveness
XP_004516664.1	ATCT-motif	AATCTAATCC	482	491	9	-	Pisum sativum	part of a conserved DNA module involved in light responsiveness
XP_004516664.1	TCA-element	TCAGAAGAGG	908	917	9	-	Brassica oleracea	cis-acting element involved in salicylic acid responsiveness
XP_004516664.1	TGACG-motif	TGACG	961	966	5	-	Hordeum vulgare	cis-acting regulatory element involved in the MeJA-responsiveness
XP_004516664.1	ABRE	GCAACGTGTC	995	1004	9	-	Hordeum vulgare	cis-acting element involved in the abscisic acid responsiveness
XP_004516664.1	MRE	AACCTAA	731	738	7	+	Petroselinum crispum	MYB binding site involved in light responsiveness
XP_004516664.1	O2-site	GATGATGTGG	1050	1059	9	-	Zea mays	cis-acting regulatory element involved in zein metabolism regulation
XP_012573264.1	HD-Zip 3	GTAAT(G/C)ATTAC	279	288.5	9.5	+	Arabidopsis thaliana	protein binding site
XP_012573264.1	G-box	TACGTG	705	711	6	-	Arabidopsis thaliana	cis-acting regulatory element involved in light responsiveness
XP_012573264.1	CGTCA-motif	CGTCA	4	9	5	+	Hordeum vulgare	cis-acting regulatory element involved in the MeJA-responsiveness
XP_012573264.1	CGTCA-motif	CGTCA	268	273	5	+	Hordeum vulgare	cis-acting regulatory element involved in the MeJA-responsiveness
XP_012573264.1	CGTCA-motif	CGTCA	1072	1077	5	-	Hordeum vulgare	cis-acting regulatory element involved in the MeJA-responsiveness
XP_012573264.1	TATC-box	TATCCCA	773	780	7	-	Oryza sativa	cis-acting element involved in gibberellin-responsiveness
XP_012573264.1	3-AF1 binding site	TAAGAGAGGAA	247	257	10	-	Solanum tuberosum	light responsive element
XP_012573264.1	LTR	CCGAAA	256	262	6	-	Hordeum vulgare	cis-acting element involved in low-temperature responsiveness
XP_012573264.1	LTR	CCGAAA	624	630	6	+	Hordeum vulgare	cis-acting element involved in low-temperature responsiveness
XP_012573264.1	LTR	CCGAAA	907	913	6	-	Hordeum vulgare	cis-acting element involved in low-temperature responsiveness
XP_012573264.1	TCT-motif	TCTTAC	1138	1144	6	+	Arabidopsis thaliana	part of a light responsive element
XP_012573264.1	Box 4	ATTAAT	231	237	6	+	Petroselinum crispum	part of a conserved DNA module involved in light responsiveness
XP_012573264.1	Box 4	ATTAAT	440	446	6	+	Petroselinum crispum	part of a conserved DNA module involved in light responsiveness
XP_012573264.1	Box 4	ATTAAT	879	885	6	-	Petroselinum crispum	part of a conserved DNA module involved in light responsiveness
XP_012573264.1	ABRE	ACGTG	705	710	5	-	Arabidopsis thaliana	cis-acting element involved in the abscisic acid responsiveness
XP_012573264.1	GCN4_motif	TGAGTCA	321	328	7	-	Oryza sativa	cis-regulatory element involved in endosperm expression
XP_012573264.1	TGACG-motif	TGACG	4	9	5	-	Hordeum vulgare	cis-acting regulatory element involved in the MeJA-responsiveness
XP_012573264.1	TGACG-motif	TGACG	268	273	5	-	Hordeum vulgare	cis-acting regulatory element involved in the MeJA-responsiveness
XP_012573264.1	TGACG-motif	TGACG	1072	1077	5	+	Hordeum vulgare	cis-acting regulatory element involved in the MeJA-responsiveness
XP_004506744.1	CGTCA-motif	CGTCA	1071	1076	5	-	Hordeum vulgare	cis-acting regulatory element involved in the MeJA-responsiveness
XP_004506744.1	ARE	AAACCA	90	96	6	-	Zea mays	cis-acting regulatory element essential for the anaerobic induction
XP_004506744.1	TGACG-motif	TGACG	1071	1076	5	+	Hordeum vulgare	cis-acting regulatory element involved in the MeJA-responsiveness
XP_004506744.1	Box 4	ATTAAT	468	474	6	+	Petroselinum crispum	part of a conserved DNA module involved in light responsiveness
XP_004506744.1	Box 4	ATTAAT	496	502	6	+	Petroselinum crispum	part of a conserved DNA module involved in light responsiveness
XP_004506744.1	TCT-motif	TCTTAC	195	201	6	+	Arabidopsis thaliana	part of a light responsive element
XP_004506744.1	MRE	AACCTAA	1052	1059	7	+	Petroselinum crispum	MYB binding site involved in light responsiveness
XP_004506744.1	GT1-motif	GGTTAA	302	308	6	-	Arabidopsis thaliana	light responsive element
XP_004506744.1	circadian	CAAAGATATC	742	751	9	+	Lycopersicon esculentum	cis-acting regulatory element involved in circadian control
XP_004506744.1	AE-box	AGAAACTT	163	171	8	-	Arabidopsis thaliana	part of a module for light response
XP_004502631.1	TGACG-motif	TGACG	247	252	5	+	Hordeum vulgare	cis-acting regulatory element involved in the MeJA-responsiveness
XP_004502631.1	ABRE	ACGTG	202	207	5	-	Arabidopsis thaliana	cis-acting element involved in the abscisic acid responsiveness
XP_004502631.1	LTR	CCGAAA	110	116	6	+	Hordeum vulgare	cis-acting element involved in low-temperature responsiveness
XP_004502631.1	GT1-motif	GGTTAA	106	112	6	-	Arabidopsis thaliana	light responsive element
XP_004502631.1	TCT-motif	TCTTAC	940	946	6	-	Arabidopsis thaliana	part of a light responsive element
XP_004502631.1	MRE	AACCTAA	427	434	7	+	Petroselinum crispum	MYB binding site involved in light responsiveness
XP_004502631.1	Box 4	ATTAAT	169	175	6	+	Petroselinum crispum	part of a conserved DNA module involved in light responsiveness
XP_004502631.1	Box 4	ATTAAT	393	399	6	+	Petroselinum crispum	part of a conserved DNA module involved in light responsiveness
XP_004502631.1	Box 4	ATTAAT	570	576	6	+	Petroselinum crispum	part of a conserved DNA module involved in light responsiveness
XP_004502631.1	O2-site	GATGA(C/T)(A/G)TG(A/G)	1146	1154	8	-	Zea mays	cis-acting regulatory element involved in zein metabolism regulation
XP_004502631.1	ARE	AAACCA	814	820	6	-	Zea mays	cis-acting regulatory element essential for the anaerobic induction
XP_004502631.1	CGTCA-motif	CGTCA	247	252	5	-	Hordeum vulgare	cis-acting regulatory element involved in the MeJA-responsiveness
XP_004506058.1	P-box	CCTTTTG	189	196	7	+	Oryza sativa	gibberellin-responsive element
XP_004506058.1	GT1-motif	GGTTAAT	397	404	7	+	Avena sativa	light responsive element
XP_004506058.1	GT1-motif	GGTTAAT	500	507	7	+	Avena sativa	light responsive element
XP_004506058.1	GT1-motif	GGTTAA	934	940	6	-	Arabidopsis thaliana	light responsive element
XP_004506058.1	MBS	CAACTG	146	152	6	+	Arabidopsis thaliana	MYB binding site involved in drought-inducibility
XP_004506058.1	MRE	AACCTAA	936	943	7	+	Petroselinum crispum	MYB binding site involved in light responsiveness
NP_001351681.1	MBS	CAACTG	320	326	6	+	Arabidopsis thaliana	MYB binding site involved in drought-inducibility
NP_001351681.1	ATCT-motif	AATCTAATCC	409	418	9	-	Pisum sativum	part of a conserved DNA module involved in light responsiveness
NP_001351681.1	A-box	CCGTCC	288	294	6	+	Petroselinum crispum	cis-acting regulatory element
NP_001351681.1	ARE	AAACCA	195	201	6	+	Zea mays	cis-acting regulatory element essential for the anaerobic induction
NP_001351681.1	G-box	TACGTG	157	163	6	-	Arabidopsis thaliana	cis-acting regulatory element involved in light responsiveness
NP_001351681.1	TCT-motif	TCTTAC	331	337	6	-	Arabidopsis thaliana	part of a light responsive element
NP_001351681.1	Box 4	ATTAAT	759	765	6	-	Petroselinum crispum	part of a conserved DNA module involved in light responsiveness
NP_001351681.1	LTR	CCGAAA	728	734	6	-	Hordeum vulgare	cis-acting element involved in low-temperature responsiveness
NP_001351681.1	AT1-motif	AATTATTTTTTATT	483	496	13	+	Solanum tuberosum	part of a light responsive module
NP_001351681.1	TCA-element	CCATCTTTTT	454	463	9	-	Nicotiana tabacum	cis-acting element involved in salicylic acid responsiveness
NP_001351681.1	RY-element	CATGCATG	57	65	8	+	Helianthus annuus	cis-acting regulatory element involved in seed-specific regulation
NP_001351681.1	4cl-CMA2b	TCTCACCAACCCCA	182	195	13	+	Petroselinum crispum	light responsive element
NP_001351681.1	ABRE	ACGTG	157	162	5	-	Arabidopsis thaliana	cis-acting element involved in the abscisic acid responsiveness
XP_004492936.1	Box 4	ATTAAT	996	1002	6	-	Petroselinum crispum	part of a conserved DNA module involved in light responsiveness
XP_004492936.1	TCA-element	TCAGAAGAGG	488	497	9	-	Brassica oleracea	cis-acting element involved in salicylic acid responsiveness
XP_004492936.1	CAT-box	GCCACT	469	475	6	+	Arabidopsis thaliana	cis-acting regulatory element related to meristem expression
XP_004492936.1	I-box	GTATAAGGCC	261	270	9	+	Larix laricina	part of a light responsive element
XP_004492936.1	I-box	TGATAATGT	960	969	9	+	Solanum tuberosum	part of a light responsive element
XP_004492936.1	MBS	CAACTG	540	546	6	-	Arabidopsis thaliana	MYB binding site involved in drought-inducibility
XP_004492936.1	GATA-motif	GATAGGA	427	434	7	+	Arabidopsis thaliana	part of a light responsive element
XP_004492936.1	G-box	CACGAC	559	565	6	-	Zea mays	cis-acting regulatory element involved in light responsiveness
XP_004504753.1	Box 4	ATTAAT	542	548	6	+	Petroselinum crispum	part of a conserved DNA module involved in light responsiveness
XP_004504753.1	Box 4	ATTAAT	871	877	6	-	Petroselinum crispum	part of a conserved DNA module involved in light responsiveness
XP_004504753.1	Box 4	ATTAAT	1185	1191	6	-	Petroselinum crispum	part of a conserved DNA module involved in light responsiveness
XP_004504753.1	LTR	CCGAAA	66	72	6	-	Hordeum vulgare	cis-acting element involved in low-temperature responsiveness
XP_004504753.1	AT1-motif	AATTATTTTTTATT	748	761	13	+	Solanum tuberosum	part of a light responsive module
XP_004504753.1	TC-rich repeats	ATTCTCTAAC	280	289	9	+	Nicotiana tabacum	cis-acting element involved in defense and stress responsiveness
XP_004504753.1	ACE	CTAACGTATT	557	566	9	+	Petroselinum crispum	cis-acting element involved in light responsiveness
XP_012570542.1	P-box	CCTTTTG	714	721	7	+	Oryza sativa	gibberellin-responsive element
XP_012570542.1	TCA-element	CCATCTTTTT	786	795	9	-	Nicotiana tabacum	cis-acting element involved in salicylic acid responsiveness
XP_012570542.1	Box 4	ATTAAT	322	328	6	+	Petroselinum crispum	part of a conserved DNA module involved in light responsiveness
XP_012570542.1	Box 4	ATTAAT	921	927	6	-	Petroselinum crispum	part of a conserved DNA module involved in light responsiveness
XP_012570542.1	TCT-motif	TCTTAC	208	214	6	+	Arabidopsis thaliana	part of a light responsive element
XP_012570542.1	AE-box	AGAAACAA	203	211	8	-	Arabidopsis thaliana	part of a module for light response
XP_004493600.1	AT1-motif	AATTATTTTTTATT	270	283	13	+	Solanum tuberosum	part of a light responsive module
XP_004493600.1	Box 4	ATTAAT	239	245	6	+	Petroselinum crispum	part of a conserved DNA module involved in light responsiveness
XP_004493600.1	Box 4	ATTAAT	250	256	6	+	Petroselinum crispum	part of a conserved DNA module involved in light responsiveness
XP_004493600.1	Box 4	ATTAAT	584	590	6	+	Petroselinum crispum	part of a conserved DNA module involved in light responsiveness
XP_004493600.1	Box 4	ATTAAT	593	599	6	+	Petroselinum crispum	part of a conserved DNA module involved in light responsiveness
XP_004493600.1	Box 4	ATTAAT	646	652	6	-	Petroselinum crispum	part of a conserved DNA module involved in light responsiveness
XP_004493600.1	Box 4	ATTAAT	980	986	6	-	Petroselinum crispum	part of a conserved DNA module involved in light responsiveness
XP_004493600.1	TCT-motif	TCTTAC	932	938	6	-	Arabidopsis thaliana	part of a light responsive element
XP_004493600.1	MBS	CAACTG	164	170	6	-	Arabidopsis thaliana	MYB binding site involved in drought-inducibility
XP_004493600.1	ABRE	ACGTG	374	379	5	-	Arabidopsis thaliana	cis-acting element involved in the abscisic acid responsiveness
XP_004493600.1	TC-rich repeats	GTTTTCTTAC	932	941	9	-	Nicotiana tabacum	cis-acting element involved in defense and stress responsiveness
XP_004493600.1	ARE	AAACCA	1195	1201	6	+	Zea mays	cis-acting regulatory element essential for the anaerobic induction
XP_004493600.1	P-box	CCTTTTG	711	718	7	+	Oryza sativa	gibberellin-responsive element
XP_004489801.1	ABRE	ACGTG	1151	1156	5	-	Arabidopsis thaliana	cis-acting element involved in the abscisic acid responsiveness
XP_004489801.1	Sp1	GGGCGG	13	19	6	-	Oryza sativa	light responsive element
XP_004489801.1	TCA-element	CCATCTTTTT	117	126	9	+	Nicotiana tabacum	cis-acting element involved in salicylic acid responsiveness
XP_004489801.1	LAMP-element	CTTTATCA	985	993	8	-	Pisum sativum	part of a light responsive element
XP_004489801.1	Box 4	ATTAAT	236	242	6	+	Petroselinum crispum	part of a conserved DNA module involved in light responsiveness
XP_004489801.1	Box 4	ATTAAT	525	531	6	+	Petroselinum crispum	part of a conserved DNA module involved in light responsiveness
XP_004489801.1	Box 4	ATTAAT	1029	1035	6	-	Petroselinum crispum	part of a conserved DNA module involved in light responsiveness
XP_004489801.1	ARE	AAACCA	1127	1133	6	+	Zea mays	cis-acting regulatory element essential for the anaerobic induction
XP_004489801.1	I-box	AAGATAAGGCT	1014	1024	10	+	Gossypium hirsutum	part of a light responsive element
XP_004489801.1	I-box	AGATAAGG	1015	1023	8	+	Triticum aestivum	part of a light responsive element
XP_004489801.1	GATA-motif	AAGGATAAGG	1013	1022	9	+	Solanum tuberosum	part of a light responsive element
XP_004516997.1	ARE	AAACCA	706	712	6	-	Zea mays	cis-acting regulatory element essential for the anaerobic induction
XP_004516997.1	ARE	AAACCA	1096	1102	6	+	Zea mays	cis-acting regulatory element essential for the anaerobic induction
XP_004516997.1	TCA-element	CCATCTTTTT	1152	1161	9	+	Nicotiana tabacum	cis-acting element involved in salicylic acid responsiveness
XP_004516997.1	TC-rich repeats	ATTCTCTAAC	215	224	9	+	Nicotiana tabacum	cis-acting element involved in defense and stress responsiveness
XP_004516997.1	GA-motif	ATAGATAA	84	92	8	-	Arabidopsis thaliana	part of a light responsive element
XP_004516997.1	GATA-motif	AAGATAAGATT	514	524	10	-	Arabidopsis thaliana	part of a light responsive element
XP_004516997.1	Box 4	ATTAAT	526	532	6	+	Petroselinum crispum	part of a conserved DNA module involved in light responsiveness
XP_004516997.1	Box 4	ATTAAT	557	563	6	+	Petroselinum crispum	part of a conserved DNA module involved in light responsiveness
XP_004516997.1	Box 4	ATTAAT	661	667	6	-	Petroselinum crispum	part of a conserved DNA module involved in light responsiveness
XP_004516997.1	Box 4	ATTAAT	694	700	6	-	Petroselinum crispum	part of a conserved DNA module involved in light responsiveness
XP_004516997.1	Box 4	ATTAAT	719	725	6	-	Petroselinum crispum	part of a conserved DNA module involved in light responsiveness
XP_004516997.1	Box 4	ATTAAT	723	729	6	-	Petroselinum crispum	part of a conserved DNA module involved in light responsiveness
XP_004516997.1	TCT-motif	TCTTAC	1103	1109	6	+	Arabidopsis thaliana	part of a light responsive element
XP_004516997.1	AE-box	AGAAACTT	1083	1091	8	-	Arabidopsis thaliana	part of a module for light response
XP_004488701.1	TGACG-motif	TGACG	1075	1080	5	-	Hordeum vulgare	cis-acting regulatory element involved in the MeJA-responsiveness
XP_004488701.1	LTR	CCGAAA	949	955	6	+	Hordeum vulgare	cis-acting element involved in low-temperature responsiveness
XP_004488701.1	Box 4	ATTAAT	798	804	6	-	Petroselinum crispum	part of a conserved DNA module involved in light responsiveness
XP_004488701.1	Box 4	ATTAAT	1174	1180	6	-	Petroselinum crispum	part of a conserved DNA module involved in light responsiveness
XP_004488701.1	TCT-motif	TCTTAC	944	950	6	+	Arabidopsis thaliana	part of a light responsive element
XP_004488701.1	GT1-motif	GGTTAAT	1150	1157	7	-	Avena sativa	light responsive element
XP_004488701.1	GT1-motif	GGTTAA	1151	1157	6	-	Arabidopsis thaliana	light responsive element
XP_004488701.1	CGTCA-motif	CGTCA	1075	1080	5	+	Hordeum vulgare	cis-acting regulatory element involved in the MeJA-responsiveness
XP_004488701.1	ARE	AAACCA	435	441	6	+	Zea mays	cis-acting regulatory element essential for the anaerobic induction
XP_004488701.1	ARE	AAACCA	807	813	6	-	Zea mays	cis-acting regulatory element essential for the anaerobic induction
XP_004509259.1	Box 4	ATTAAT	349	355	6	+	Petroselinum crispum	part of a conserved DNA module involved in light responsiveness
XP_004509259.1	ABRE	TACGTGTC	123	131	8	+	Oryza sativa	cis-acting element involved in the abscisic acid responsiveness
XP_004509259.1	ABRE	ACGTG	124	129	5	+	Arabidopsis thaliana	cis-acting element involved in the abscisic acid responsiveness
XP_004509259.1	CAT-box	GCCACT	830	836	6	+	Arabidopsis thaliana	cis-acting regulatory element related to meristem expression
XP_004509259.1	ARE	AAACCA	53	59	6	+	Zea mays	cis-acting regulatory element essential for the anaerobic induction
XP_004509259.1	ARE	AAACCA	452	458	6	-	Zea mays	cis-acting regulatory element essential for the anaerobic induction
XP_004509259.1	ARE	AAACCA	719	725	6	+	Zea mays	cis-acting regulatory element essential for the anaerobic induction
XP_004509259.1	G-box	TACGTG	123	129	6	+	Arabidopsis thaliana	cis-acting regulatory element involved in light responsiveness
XP_004491518.1	AACA_motif	TAACAAACTCCA	138	150	12	-	Oryza sativa	involved in endosperm-specific negative expression
XP_004491518.1	A-box	AATAACAAACTCC	139	152	13	-	Oryza sativa	sequence conserved in alpha-amylase promoters
XP_004491518.1	GCN4_motif	TGAGTCA	372	379	7	+	Oryza sativa	cis-regulatory element involved in endosperm expression
XP_004491518.1	AT1-motif	AATTATTTTTTATT	725	738	13	+	Solanum tuberosum	part of a light responsive module
XP_004491518.1	Box 4	ATTAAT	149	155	6	+	Petroselinum crispum	part of a conserved DNA module involved in light responsiveness
XP_004491518.1	Box 4	ATTAAT	1173	1179	6	-	Petroselinum crispum	part of a conserved DNA module involved in light responsiveness
XP_004512086.1	P-box	CCTTTTG	88	95	7	+	Oryza sativa	gibberellin-responsive element
XP_004512086.1	ARE	AAACCA	1095	1101	6	+	Zea mays	cis-acting regulatory element essential for the anaerobic induction
XP_004512086.1	Box 4	ATTAAT	154	160	6	+	Petroselinum crispum	part of a conserved DNA module involved in light responsiveness
XP_004512086.1	Box 4	ATTAAT	701	707	6	-	Petroselinum crispum	part of a conserved DNA module involved in light responsiveness
XP_004512086.1	Box 4	ATTAAT	717	723	6	-	Petroselinum crispum	part of a conserved DNA module involved in light responsiveness
XP_004512086.1	Box 4	ATTAAT	814	820	6	-	Petroselinum crispum	part of a conserved DNA module involved in light responsiveness
XP_004512086.1	GT1-motif	GGTTAA	502	508	6	+	Arabidopsis thaliana	light responsive element
XP_004512086.1	AT1-motif	AATTATTTTTTATT	913	926	13	-	Solanum tuberosum	part of a light responsive module
XP_004512086.1	GC-motif	CCCCCG	1062	1068	6	+	Zea mays	enhancer-like element involved in anoxic specific inducibility
XP_004512086.1	AT-rich element	ATAGAAATCAA	623	633	10	-	Glycine max	binding site of AT-rich DNA binding protein (ATBP-1)
XP_004512086.1	ABRE	ACGTG	297	302	5	+	Arabidopsis thaliana	cis-acting element involved in the abscisic acid responsiveness
XP_004504352.1	TCT-motif	TCTTAC	837	843	6	-	Arabidopsis thaliana	part of a light responsive element
XP_004504352.1	Box 4	ATTAAT	77	83	6	+	Petroselinum crispum	part of a conserved DNA module involved in light responsiveness
XP_004504352.1	Box 4	ATTAAT	703	709	6	-	Petroselinum crispum	part of a conserved DNA module involved in light responsiveness
XP_004504352.1	Box 4	ATTAAT	902	908	6	-	Petroselinum crispum	part of a conserved DNA module involved in light responsiveness
XP_004504352.1	GCN4_motif	TGAGTCA	236	243	7	-	Oryza sativa	cis-regulatory element involved in endosperm expression
XP_004504352.1	TGACG-motif	TGACG	39	44	5	-	Hordeum vulgare	cis-acting regulatory element involved in the MeJA-responsiveness
XP_004504352.1	ARE	AAACCA	315	321	6	+	Zea mays	cis-acting regulatory element essential for the anaerobic induction
XP_004504352.1	ARE	AAACCA	450	456	6	+	Zea mays	cis-acting regulatory element essential for the anaerobic induction
XP_004504352.1	ARE	AAACCA	607	613	6	-	Zea mays	cis-acting regulatory element essential for the anaerobic induction
XP_004504352.1	AT-rich element	ATAGAAATCAA	246	256	10	+	Glycine max	binding site of AT-rich DNA binding protein (ATBP-1)
XP_004504352.1	CGTCA-motif	CGTCA	39	44	5	+	Hordeum vulgare	cis-acting regulatory element involved in the MeJA-responsiveness
XP_004504352.1	ABRE	CGCACGTGTC	438	447	9	-	Hordeum vulgare	cis-acting element involved in the abscisic acid responsiveness
XP_004504352.1	GARE-motif	TCTGTTG	1081	1088	7	-	Brassica oleracea	gibberellin-responsive element
XP_004510156.1	G-box	CCACGTAA	1088	1096	8	-	Brassica napus	cis-acting regulatory element involved in light responsiveness
XP_004510156.1	CAAT-box	CAAAT	113	118	5	-	Pisum sativum	common cis-acting element in promoter and enhancer regions
XP_004510156.1	TATA-box	TATA	9	13	4	+	Arabidopsis thaliana	core promoter element around -30 of transcription start
XP_004510156.1	TATA-box	ATATAT	1073	1079	6	-	Brassica napus	core promoter element around -30 of transcription start
XP_004510156.1	TATA-box	TATA	1074	1078	4	-	Arabidopsis thaliana	core promoter element around -30 of transcription start
XP_004510156.1	TATA-box	TATA	1165	1169	4	-	Arabidopsis thaliana	core promoter element around -30 of transcription start
XP_004515598.1	CAAT-box	CAAAT	5	10	5	-	Pisum sativum	common cis-acting element in promoter and enhancer regions
XP_004515598.1	CAAT-box	CAAAT	52	57	5	-	Pisum sativum	common cis-acting element in promoter and enhancer regions
XP_004515598.1	CAAT-box	CAAAT	1176	1181	5	-	Pisum sativum	common cis-acting element in promoter and enhancer regions
XP_004515598.1	TATA-box	TATATAA	126	133	7	-	Arabidopsis thaliana	core promoter element around -30 of transcription start
XP_004515598.1	TATA-box	TATAA	921	926	5	-	Arabidopsis thaliana	core promoter element around -30 of transcription start
XP_004515598.1	TATA-box	TATA	922	926	4	-	Arabidopsis thaliana	core promoter element around -30 of transcription start
XP_004489174.1	CAAT-box	CAAAT	324	329	5	+	Pisum sativum	common cis-acting element in promoter and enhancer regions
XP_004515076.1	CAAT-box	CCAAT	577	582	5	-	Arabidopsis thaliana	common cis-acting element in promoter and enhancer regions
XP_004515076.1	CAAT-box	CCAAT	658	663	5	-	Arabidopsis thaliana	common cis-acting element in promoter and enhancer regions
XP_004515076.1	CAAT-box	CAAAT	687	692	5	-	Pisum sativum	common cis-acting element in promoter and enhancer regions
XP_004515076.1	CAAT-box	CAAAT	717	722	5	+	Pisum sativum	common cis-acting element in promoter and enhancer regions
XP_004515076.1	CAAT-box	CAAAT	884	889	5	-	Pisum sativum	common cis-acting element in promoter and enhancer regions
XP_004515076.1	CAAT-box	CAAAT	1077	1082	5	+	Pisum sativum	common cis-acting element in promoter and enhancer regions
XP_004515076.1	TATA-box	ATATAT	14	20	6	+	Brassica napus	core promoter element around -30 of transcription start
XP_004515076.1	TATA-box	TATAAGAA	1109	1117	8	-	Zea mays	core promoter element around -30 of transcription start
XP_004515076.1	TATA-box	TATAA	1112	1117	5	-	Arabidopsis thaliana	core promoter element around -30 of transcription start
XP_004515076.1	TATA-box	TATA	1113	1117	4	-	Arabidopsis thaliana	core promoter element around -30 of transcription start
XP_004510029.1	CAAT-box	CAAAT	94	99	5	-	Pisum sativum	common cis-acting element in promoter and enhancer regions
XP_004510029.1	CAAT-box	CAAAT	171	176	5	-	Pisum sativum	common cis-acting element in promoter and enhancer regions
XP_004510029.1	CAAT-box	CCAAT	1079	1084	5	-	Arabidopsis thaliana	common cis-acting element in promoter and enhancer regions
XP_004510029.1	TATA-box	TATA	62	66	4	+	Arabidopsis thaliana	core promoter element around -30 of transcription start
XP_004510029.1	TATA-box	ATATAT	208	214	6	+	Brassica napus	core promoter element around -30 of transcription start
XP_004510029.1	TATA-box	TATA	209	213	4	+	Arabidopsis thaliana	core promoter element around -30 of transcription start
XP_004510029.1	TATA-box	TATTTAAA	253	261	8	-	Arabidopsis thaliana	core promoter element around -30 of transcription start
XP_004510029.1	TATA-box	TACAAAA	368	375	7	-	Oryza sativa	core promoter element around -30 of transcription start
XP_004510029.1	TATA-box	TATA	1194	1198	4	-	Arabidopsis thaliana	core promoter element around -30 of transcription start
XP_004512683.1	CAAT-box	CAAAT	3	8	5	+	Pisum sativum	common cis-acting element in promoter and enhancer regions
XP_004512683.1	CAAT-box	CAAAT	932	937	5	+	Pisum sativum	common cis-acting element in promoter and enhancer regions
XP_004512683.1	TATA-box	ccTATAAAaa	129	138	9	+	Arabidopsis thaliana	core promoter element around -30 of transcription start
XP_004512683.1	TATA-box	TATA	131	135	4	+	Arabidopsis thaliana	core promoter element around -30 of transcription start
XP_004512683.1	TATA-box	TAAAGATT	361	369	8	-	Arabidopsis thaliana	core promoter element around -30 of transcription start
XP_004512683.1	TATA-box	TATAAAA	387	394	7	-	Pisum sativum	core promoter element around -30 of transcription start
XP_004512683.1	TATA-box	TATAAA	388	394	6	-	Helianthus annuus	core promoter element around -30 of transcription start
XP_004512683.1	TATA-box	TATATAA	389	396	7	-	Arabidopsis thaliana	core promoter element around -30 of transcription start
XP_004512683.1	TATA-box	TATATA	390	396	6	+	Arabidopsis thaliana	core promoter element around -30 of transcription start
XP_004512683.1	TATA-box	TATA	392	396	4	+	Arabidopsis thaliana	core promoter element around -30 of transcription start
XP_004512683.1	TATA-box	TAAAGATT	432	440	8	-	Arabidopsis thaliana	core promoter element around -30 of transcription start
XP_004512683.1	TATA-box	TATAAAA	523	530	7	-	Pisum sativum	core promoter element around -30 of transcription start
XP_004512683.1	TATA-box	TATAAA	524	530	6	-	Helianthus annuus	core promoter element around -30 of transcription start
XP_004512683.1	TATA-box	TATAA	525	530	5	-	Arabidopsis thaliana	core promoter element around -30 of transcription start
XP_004512683.1	TATA-box	TATA	526	530	4	+	Arabidopsis thaliana	core promoter element around -30 of transcription start
XP_004512683.1	TATA-box	TAAAGATT	545	553	8	-	Arabidopsis thaliana	core promoter element around -30 of transcription start
XP_004512683.1	TATA-box	TATAAAA	554	561	7	-	Pisum sativum	core promoter element around -30 of transcription start
XP_004512683.1	TATA-box	TATAAA	555	561	6	-	Helianthus annuus	core promoter element around -30 of transcription start
XP_004512683.1	TATA-box	TATAA	556	561	5	-	Arabidopsis thaliana	core promoter element around -30 of transcription start
XP_004512683.1	TATA-box	TATA	557	561	4	+	Arabidopsis thaliana	core promoter element around -30 of transcription start
XP_004512683.1	TATA-box	TATAAAA	644	651	7	-	Pisum sativum	core promoter element around -30 of transcription start
XP_004512683.1	TATA-box	TATAAA	645	651	6	-	Helianthus annuus	core promoter element around -30 of transcription start
XP_004512683.1	TATA-box	TATATAA	646	653	7	-	Arabidopsis thaliana	core promoter element around -30 of transcription start
XP_004512683.1	TATA-box	TATATA	647	653	6	-	Arabidopsis thaliana	core promoter element around -30 of transcription start
XP_004512683.1	TATA-box	ATATAT	648	654	6	-	Brassica napus	core promoter element around -30 of transcription start
XP_004512683.1	TATA-box	TATA	649	653	4	-	Arabidopsis thaliana	core promoter element around -30 of transcription start
XP_004512683.1	TATA-box	ATATAA	669	675	6	+	Brassica oleracea	core promoter element around -30 of transcription start
XP_004512683.1	TATA-box	TATA	670	674	4	-	Arabidopsis thaliana	core promoter element around -30 of transcription start
XP_004512683.1	TATA-box	ATATAT	682	688	6	-	Brassica napus	core promoter element around -30 of transcription start
XP_004512683.1	TATA-box	TATATA	683	689	6	-	Arabidopsis thaliana	core promoter element around -30 of transcription start
XP_004512683.1	TATA-box	ATATAT	684	690	6	-	Brassica napus	core promoter element around -30 of transcription start
XP_004512683.1	TATA-box	TATA	685	689	4	-	Arabidopsis thaliana	core promoter element around -30 of transcription start
XP_004512683.1	TATA-box	TATATTTATATTT	701	713	12	-	Avena sativa	core promoter element around -30 of transcription start
XP_004512683.1	TATA-box	ATTATA	702	708	6	+	Brassica napus	core promoter element around -30 of transcription start
XP_004512683.1	TATA-box	TATAA	703	708	5	-	Arabidopsis thaliana	core promoter element around -30 of transcription start
XP_004512683.1	TATA-box	TATA	704	708	4	-	Arabidopsis thaliana	core promoter element around -30 of transcription start
XP_004512683.1	TATA-box	ATATAA	709	715	6	+	Brassica oleracea	core promoter element around -30 of transcription start
XP_004512683.1	TATA-box	TATA	710	714	4	-	Arabidopsis thaliana	core promoter element around -30 of transcription start
XP_004512683.1	TATA-box	ATATAA	785	791	6	+	Brassica oleracea	core promoter element around -30 of transcription start
XP_004512683.1	TATA-box	TATA	786	790	4	-	Arabidopsis thaliana	core promoter element around -30 of transcription start
XP_004512683.1	TATA-box	TATTTAAA	809	817	8	+	Arabidopsis thaliana	core promoter element around -30 of transcription start
XP_004512683.1	TATA-box	TATTTAAA	859	867	8	+	Arabidopsis thaliana	core promoter element around -30 of transcription start
XP_004512683.1	TATA-box	TATACA	964	970	6	-	Helianthus annuus	core promoter element around -30 of transcription start
XP_004512683.1	TATA-box	TATA	966	970	4	-	Arabidopsis thaliana	core promoter element around -30 of transcription start
XP_004499918.1	CAAT-box	CAAAT	754	759	5	+	Pisum sativum	common cis-acting element in promoter and enhancer regions
XP_004499918.1	TATA-box	ATATAA	925	931	6	+	Brassica oleracea	core promoter element around -30 of transcription start
XP_004499918.1	TATA-box	TATA	926	930	4	-	Arabidopsis thaliana	core promoter element around -30 of transcription start
XP_004498868.1	TATA-box	ATATAT	21	27	6	+	Brassica napus	core promoter element around -30 of transcription start
XP_004498868.1	CAAT-box	CAAAT	1146	1151	5	+	Pisum sativum	common cis-acting element in promoter and enhancer regions
XP_004498868.1	CAAT-box	CCAAT	1156	1161	5	+	Arabidopsis thaliana	common cis-acting element in promoter and enhancer regions
XP_004498868.1	CAAT-box	CAAAT	1162	1167	5	+	Pisum sativum	common cis-acting element in promoter and enhancer regions
XP_004504712.1	CAAT-box	CAAAT	177	182	5	-	Pisum sativum	common cis-acting element in promoter and enhancer regions
XP_004504712.1	CAAT-box	CAAAT	280	285	5	-	Pisum sativum	common cis-acting element in promoter and enhancer regions
XP_004504712.1	TATA-box	TATA	936	940	4	-	Arabidopsis thaliana	core promoter element around -30 of transcription start
XP_004504712.1	TATA-box	TATA	1004	1008	4	-	Arabidopsis thaliana	core promoter element around -30 of transcription start
XP_004513963.1	TATA-box	TACAAAA	81	88	7	-	Oryza sativa	core promoter element around -30 of transcription start
XP_004513963.1	CAAT-box	CAAAT	899	904	5	-	Pisum sativum	common cis-acting element in promoter and enhancer regions
XP_004491318.1	CAAT-box	CAAAT	50	55	5	-	Pisum sativum	common cis-acting element in promoter and enhancer regions
XP_004491318.1	TATA-box	TATAA	1119	1124	5	-	Arabidopsis thaliana	core promoter element around -30 of transcription start
XP_004491318.1	TATA-box	TATA	1120	1124	4	-	Arabidopsis thaliana	core promoter element around -30 of transcription start
XP_004510052.1	TATA-box	TATAAAA	201	208	7	-	Pisum sativum	core promoter element around -30 of transcription start
XP_004510052.1	CAAT-box	CAAAT	1064	1069	5	+	Pisum sativum	common cis-acting element in promoter and enhancer regions
XP_004510052.1	CAAT-box	CAAAT	1134	1139	5	+	Pisum sativum	common cis-acting element in promoter and enhancer regions
XP_004516664.1	CAAT-box	CAAAT	84	89	5	-	Pisum sativum	common cis-acting element in promoter and enhancer regions
XP_004516664.1	CAAT-box	CCAAT	158	163	5	-	Arabidopsis thaliana	common cis-acting element in promoter and enhancer regions
XP_004516664.1	CAAT-box	CAAAT	165	170	5	+	Pisum sativum	common cis-acting element in promoter and enhancer regions
XP_004516664.1	TATA-box	TATA	60	64	4	+	Arabidopsis thaliana	core promoter element around -30 of transcription start
XP_004516664.1	TATA-box	ATATAT	778	784	6	-	Brassica napus	core promoter element around -30 of transcription start
XP_004516664.1	TATA-box	TATA	779	783	4	-	Arabidopsis thaliana	core promoter element around -30 of transcription start
XP_004516664.1	TATA-box	TACAAAA	1024	1031	7	-	Oryza sativa	core promoter element around -30 of transcription start
XP_012573264.1	CAAT-box	CAAAT	813	818	5	-	Pisum sativum	common cis-acting element in promoter and enhancer regions
XP_012573264.1	CAAT-box	CAAAT	874	879	5	+	Pisum sativum	common cis-acting element in promoter and enhancer regions
XP_012573264.1	TATA-box	ATATAA	139	145	6	+	Brassica oleracea	core promoter element around -30 of transcription start
XP_012573264.1	TATA-box	TATA	140	144	4	+	Arabidopsis thaliana	core promoter element around -30 of transcription start
XP_012573264.1	TATA-box	TATAA	201	206	5	-	Arabidopsis thaliana	core promoter element around -30 of transcription start
XP_012573264.1	TATA-box	TATA	202	206	4	+	Arabidopsis thaliana	core promoter element around -30 of transcription start
XP_012573264.1	TATA-box	TATA	970	974	4	-	Arabidopsis thaliana	core promoter element around -30 of transcription start
XP_012573264.1	TATA-box	TATA	1184	1188	4	-	Arabidopsis thaliana	core promoter element around -30 of transcription start
XP_004506744.1	CAAT-box	CAAAT	110	115	5	-	Pisum sativum	common cis-acting element in promoter and enhancer regions
XP_004506744.1	CAAT-box	CAAAT	290	295	5	+	Pisum sativum	common cis-acting element in promoter and enhancer regions
XP_004506744.1	CAAT-box	CAAAT	785	790	5	+	Pisum sativum	common cis-acting element in promoter and enhancer regions
XP_004506744.1	CAAT-box	CCAAT	1025	1030	5	-	Arabidopsis thaliana	common cis-acting element in promoter and enhancer regions
XP_004506744.1	CAAT-box	CAAAT	1093	1098	5	+	Pisum sativum	common cis-acting element in promoter and enhancer regions
XP_004506744.1	TATA-box	TATAAA	21	27	6	-	Helianthus annuus	core promoter element around -30 of transcription start
XP_004502631.1	TATA-box	TATA	1065	1069	4	-	Arabidopsis thaliana	core promoter element around -30 of transcription start
XP_004502631.1	TATA-box	TATA	1162	1166	4	-	Arabidopsis thaliana	core promoter element around -30 of transcription start
XP_004502631.1	CAAT-box	CAAAT	18	23	5	-	Pisum sativum	common cis-acting element in promoter and enhancer regions
XP_004506058.1	CAAT-box	CCAAT	444	449	5	-	Arabidopsis thaliana	common cis-acting element in promoter and enhancer regions
XP_004506058.1	CAAT-box	CAAAT	479	484	5	-	Pisum sativum	common cis-acting element in promoter and enhancer regions
XP_004506058.1	TATA-box	ATATAA	25	31	6	+	Brassica oleracea	core promoter element around -30 of transcription start
XP_004506058.1	TATA-box	TATAA	1165	1170	5	-	Arabidopsis thaliana	core promoter element around -30 of transcription start
XP_004506058.1	TATA-box	TATA	1166	1170	4	-	Arabidopsis thaliana	core promoter element around -30 of transcription start
NP_001351681.1	CAAT-box	CCAAT	5	10	5	-	Arabidopsis thaliana	common cis-acting element in promoter and enhancer regions
NP_001351681.1	CAAT-box	CAAAT	108	113	5	+	Pisum sativum	common cis-acting element in promoter and enhancer regions
NP_001351681.1	CAAT-box	CAAAT	111	116	5	-	Pisum sativum	common cis-acting element in promoter and enhancer regions
NP_001351681.1	CAAT-box	CCAAT	198	203	5	+	Arabidopsis thaliana	common cis-acting element in promoter and enhancer regions
NP_001351681.1	CAAT-box	CAAAT	265	270	5	-	Pisum sativum	common cis-acting element in promoter and enhancer regions
NP_001351681.1	CAAT-box	CAAAT	692	697	5	-	Pisum sativum	common cis-acting element in promoter and enhancer regions
NP_001351681.1	TATA-box	TATA	161	165	4	+	Arabidopsis thaliana	core promoter element around -30 of transcription start
XP_004492936.1	TATA-box	TATA	1185	1189	4	-	Arabidopsis thaliana	core promoter element around -30 of transcription start
XP_004492936.1	TATA-box	TATA	1193	1197	4	-	Arabidopsis thaliana	core promoter element around -30 of transcription start
XP_004504753.1	TATA-box	TATA	812	816	4	-	Arabidopsis thaliana	core promoter element around -30 of transcription start
XP_004504753.1	CAAT-box	CAAAT	3	8	5	-	Pisum sativum	common cis-acting element in promoter and enhancer regions
XP_004504753.1	CAAT-box	CCAAT	1029	1034	5	-	Arabidopsis thaliana	common cis-acting element in promoter and enhancer regions
XP_004504753.1	CAAT-box	CCAAT	1039	1044	5	-	Arabidopsis thaliana	common cis-acting element in promoter and enhancer regions
XP_012570542.1	CAAT-box	CCAAT	106	111	5	+	Arabidopsis thaliana	common cis-acting element in promoter and enhancer regions
XP_012570542.1	TATA-box	TATA	143	147	4	+	Arabidopsis thaliana	core promoter element around -30 of transcription start
XP_004493600.1	TATA-box	ATTATA	1123	1129	6	+	Brassica napus	core promoter element around -30 of transcription start
XP_004493600.1	TATA-box	TATAA	1124	1129	5	-	Arabidopsis thaliana	core promoter element around -30 of transcription start
XP_004493600.1	CAAT-box	CAAAT	536	541	5	-	Pisum sativum	common cis-acting element in promoter and enhancer regions
XP_004493600.1	CAAT-box	CAAAT	1037	1042	5	+	Pisum sativum	common cis-acting element in promoter and enhancer regions
XP_004489801.1	TATA-box	TATA	139	143	4	+	Arabidopsis thaliana	core promoter element around -30 of transcription start
XP_004489801.1	CAAT-box	CAAAT	958	963	5	+	Pisum sativum	common cis-acting element in promoter and enhancer regions
XP_004489801.1	CAAT-box	CAAAT	1100	1105	5	+	Pisum sativum	common cis-acting element in promoter and enhancer regions
XP_004516997.1	CAAT-box	CCAAT	80	85	5	+	Arabidopsis thaliana	common cis-acting element in promoter and enhancer regions
XP_004516997.1	TATA-box	TATA	1178	1182	4	-	Arabidopsis thaliana	core promoter element around -30 of transcription start
XP_004488701.1	TATA-box	TATA	344	348	4	+	Arabidopsis thaliana	core promoter element around -30 of transcription start
XP_004488701.1	TATA-box	TATA	643	647	4	-	Arabidopsis thaliana	core promoter element around -30 of transcription start
XP_004509259.1	TATA-box	TATA	893	897	4	-	Arabidopsis thaliana	core promoter element around -30 of transcription start
XP_004509259.1	TATA-box	TACAAAA	1096	1103	7	-	Oryza sativa	core promoter element around -30 of transcription start
XP_004509259.1	CAAT-box	CAAAT	15	20	5	+	Pisum sativum	common cis-acting element in promoter and enhancer regions
XP_004491518.1	CAAT-box	CCAAT	1027	1032	5	+	Arabidopsis thaliana	common cis-acting element in promoter and enhancer regions
XP_004491518.1	TATA-box	ATATAT	71	77	6	+	Brassica napus	core promoter element around -30 of transcription start
XP_004491518.1	TATA-box	TATATA	72	78	6	+	Arabidopsis thaliana	core promoter element around -30 of transcription start
XP_004491518.1	TATA-box	TATA	796	800	4	-	Arabidopsis thaliana	core promoter element around -30 of transcription start
XP_004491518.1	TATA-box	TATA	863	867	4	-	Arabidopsis thaliana	core promoter element around -30 of transcription start
XP_004491518.1	TATA-box	ATATAA	913	919	6	+	Brassica oleracea	core promoter element around -30 of transcription start
XP_004491518.1	TATA-box	TATA	914	918	4	-	Arabidopsis thaliana	core promoter element around -30 of transcription start
XP_004512086.1	CAAT-box	CAAAT	97	102	5	+	Pisum sativum	common cis-acting element in promoter and enhancer regions
XP_004512086.1	CAAT-box	CAAAT	493	498	5	-	Pisum sativum	common cis-acting element in promoter and enhancer regions
XP_004512086.1	CAAT-box	CCAAT	820	825	5	-	Arabidopsis thaliana	common cis-acting element in promoter and enhancer regions
XP_004512086.1	CAAT-box	CAAAT	962	967	5	-	Pisum sativum	common cis-acting element in promoter and enhancer regions
XP_004512086.1	CAAT-box	CAAAT	975	980	5	-	Pisum sativum	common cis-acting element in promoter and enhancer regions
XP_004512086.1	CAAT-box	CAAAT	1119	1124	5	+	Pisum sativum	common cis-acting element in promoter and enhancer regions
XP_004512086.1	CAAT-box	CAAAT	1122	1127	5	-	Pisum sativum	common cis-acting element in promoter and enhancer regions
XP_004512086.1	TATA-box	TATATTTATATTT	8	20	12	+	Avena sativa	core promoter element around -30 of transcription start
XP_004504352.1	TATA-box	ATATAA	906	912	6	+	Brassica oleracea	core promoter element around -30 of transcription start
XP_004504352.1	CAAT-box	CAAAT	995	1000	5	-	Pisum sativum	common cis-acting element in promoter and enhancer regions

## Sheet:  Supplementary Table 6
	Supplementary Table 6. Highly efficient trans-regulatory elements identified with stringent thresholds (p-value < 1e-5 and q-value < 0.05), including their start and stop positions.
#pattern name	Family	sequence name	start	stop	strand	score	p-value	q-value	matched sequence
LOC101499805	ERF	XP_012573264.1	914	928	+	28.3333	8.33e-13	4.19e-08	GCGATGGCGGCGGCG
LOC101491273	ERF	XP_004491318.1	1367	1383	+	32.2381	4.96e-12	2.3e-07	GCGGCGGCGGCCGTGGC
LOC101496212	ERF	XP_004509259.1	340	367	-	31.3016	1.13e-11	3.81e-07	CCAGGGTCGCCGCCGCCACAATGCCCAC
LOC101496212	ERF	XP_004491318.1	1355	1382	-	30.2381	3.41e-11	5.01e-07	CCACGGCCGCCGCCGCTCTGGTTACGGC
LOC101496212	ERF	XP_004491318.1	644	671	-	29.9683	4.48e-11	5.01e-07	GCGCTCCAGCCGCCATCGCTGCCCTGCT
LOC101506937	ERF	XP_012573264.1	910	930	-	31.4127	1.28e-11	5.46e-07	CGCGCCGCCGCCATCGCTGCT
LOC101496212	ERF	XP_004512683.1	19	46	-	29.1429	1e-10	6.94e-07	TCACCATCGCCGCCGGCGCCAGTTCTTC
LOC101496212	ERF	NP_001351681.1	589	616	+	29.1111	1.03e-10	6.94e-07	GTGGTGGCGCCGCCGGATGCGCCGCTGC
LOC101492500	ERF	XP_004502631.1	119	133	+	30.1746	1.58e-11	7.13e-07	GCGGCGGCGGCGCGG
LOC101492500	ERF	XP_012573264.1	914	928	+	29.7937	2.8e-11	7.13e-07	GCGATGGCGGCGGCG
LOC101504527	ERF	XP_012573264.1	909	929	+	31.7937	1.33e-11	7.21e-07	TAGCAGCGATGGCGGCGGCGC
LOC101506937	ERF	XP_004509259.1	342	362	-	29.8571	5.54e-11	9.84e-07	GTCGCCGCCGCCACAATGCCC
LOC101506937	ERF	XP_004509259.1	445	465	-	29.1587	1.03e-10	9.84e-07	CACGCCGCCGCTGCTGCCCAC
LOC101506937	ERF	NP_001266141.1	489	509	-	29.0317	1.15e-10	9.84e-07	TCCGGCGCCGCCGCGCCCACA
LOC101506937	ERF	NP_001265927.1	651	671	-	29.0317	1.15e-10	9.84e-07	TCCGGCGCCGCCGCGCCCACA
LOC101497871	ERF	XP_012573264.1	909	929	-	31.3881	2.4e-11	1.15e-06	GCGCCGCCGCCATCGCTGCTA
LOC101510560	ERF	XP_004512683.1	29	43	-	27.8095	3.11e-11	1.21e-06	CCATCGCCGCCGGCG
LOC101496212	ERF	XP_004502631.1	107	134	-	28.2698	2.26e-10	1.21e-06	TCCGCGCCGCCGCCGCAATACAGTTCGC
LOC101496212	ERF	XP_012573264.1	905	932	-	28.1429	2.54e-10	1.21e-06	AGCGCGCCGCCGCCATCGCTGCTAATAC
LOC101496212	ERF	XP_004509259.1	443	470	-	28	2.89e-10	1.21e-06	GTCACCACGCCGCCGCTGCTGCCCACCA
LOC101512899	ERF	XP_012573264.1	909	929	+	29.9048	3.34e-11	1.59e-06	TAGCAGCGATGGCGGCGGCGC
LOC101493699	ERF	XP_004512683.1	26	45	-	29.873	3.38e-11	1.64e-06	CACCATCGCCGCCGGCGCCA
LOC101496212	ERF	XP_004489174.1	136	163	+	27.2698	5.5e-10	2.05e-06	GCGATTCCGCCGCCGCCGTGCGTGGAAG
LOC101491273	ERF	XP_004502631.1	119	135	+	29.4127	9.02e-11	2.1e-06	GCGGCGGCGGCGCGGAT
LOC101507986	ERF	XP_004512683.1	27	47	+	30.3284	4.53e-11	2.18e-06	GGCGCCGGCGGCGatgGTGAA
LOC101496212	ERF	XP_004516997.1	2587	2614	+	26.9841	7.03e-10	2.36e-06	CTGAAACCGCCGCCGCTGTATCTGTGGA
LOC101493699	ERF	XP_004491318.1	1368	1387	-	28.5556	1.12e-10	2.72e-06	TATCGCCACGGCCGCCGCCG
LOC101495239	ERF	XP_012573264.1	910	930	-	29.2985	1.19e-10	3.06e-06	CGCGCCGCCGCCATCGCTGCT
LOC101495239	ERF	XP_004512683.1	27	47	-	29.0448	1.4e-10	3.06e-06	TTCACCATCGCCGCCGGCGCC
LOC101506937	ERF	NP_001351681.1	594	614	+	27.3492	4.74e-10	3.37e-06	GGCGCCGCCGGATGCGCCGCT
LOC101504527	ERF	XP_004498868.1	1155	1175	+	28.9524	1.41e-10	3.6e-06	GGGCTGCGGCAGCGGCGGCAT
LOC101504527	ERF	XP_004509259.1	444	464	+	28.0635	2.81e-10	3.6e-06	GGTGGGCAGCAGCGGCGGCGT
LOC101504527	ERF	XP_004509259.1	341	361	+	27.6667	3.8e-10	3.6e-06	TGGGCATTGTGGCGGCGGCGA
LOC101504527	ERF	NP_001351681.1	595	615	-	27.4603	4.44e-10	3.6e-06	CAGCGGCGCATCCGGCGGCGC
LOC101504527	ERF	NP_001266141.1	488	508	+	27.2857	5.06e-10	3.6e-06	ATGTGGGCGCGGCGGCGCCGG
LOC101504527	ERF	NP_001265927.1	650	670	+	27.2857	5.06e-10	3.6e-06	ATGTGGGCGCGGCGGCGCCGG
LOC101504527	ERF	XP_004510156.1	334	354	-	27.2222	5.31e-10	3.6e-06	CGGCACCTGCGCCGGCGCCGC
LOC101506937	ERF	XP_004498868.1	1156	1176	-	27.0635	5.97e-10	3.63e-06	AATGCCGCCGCTGCCGCAGCC
LOC101497871	ERF	NP_001266141.1	488	508	-	28.4478	2.35e-10	3.74e-06	CCGGCGCCGCCGCGCCCACAT
LOC101497871	ERF	NP_001265927.1	650	670	-	28.4478	2.35e-10	3.74e-06	CCGGCGCCGCCGCGCCCACAT
LOC101503531	ERF	XP_012573264.1	912	930	+	28.9365	9.17e-11	4.16e-06	CAGCGATGGCGGCGGCGCG
LOC101503531	ERF	NP_001266141.1	491	509	+	27.746	2.74e-10	4.16e-06	TGGGCGCGGCGGCGCCGGA
LOC101503531	ERF	NP_001265927.1	653	671	+	27.746	2.74e-10	4.16e-06	TGGGCGCGGCGGCGCCGGA
LOC101506937	ERF	XP_004510156.1	333	353	+	26.6984	7.97e-10	4.25e-06	TGCGGCGCCGGCGCAGGTGCC
LOC101500525	ERF	XP_004502631.1	117	131	-	28.3175	1.47e-10	4.47e-06	GCGCCGCCGCCGCAA
LOC101500525	ERF	XP_004498868.1	219	233	-	27.5079	3.15e-10	4.47e-06	CGGCCGCCGCCGCTA
LOC101500525	ERF	XP_004502631.1	120	134	-	27.0159	4.96e-10	4.47e-06	TCCGCGCCGCCGCCG
LOC101500525	ERF	NP_001266141.1	494	508	-	26.9206	5.45e-10	4.47e-06	CCGGCGCCGCCGCGC
LOC101500525	ERF	NP_001265927.1	656	670	-	26.9206	5.45e-10	4.47e-06	CCGGCGCCGCCGCGC
LOC101500525	ERF	XP_004489174.1	142	156	+	26.7778	6.13e-10	4.47e-06	CCGCCGCCGCCGTGC
LOC101492500	ERF	XP_004502631.1	116	130	+	27.7778	2.67e-10	4.5e-06	ATTGCGGCGGCGGCG
LOC101492500	ERF	XP_004489174.1	140	154	-	27.2381	4.58e-10	4.5e-06	ACGGCGGCGGCGGAA
LOC101492500	ERF	NP_001266141.1	493	507	+	27.0794	5.31e-10	4.5e-06	GGCGCGGCGGCGCCG
LOC101492500	ERF	NP_001265927.1	655	669	+	27.0794	5.31e-10	4.5e-06	GGCGCGGCGGCGCCG
LOC101497871	ERF	XP_012570542.1	213	233	-	27.5821	4.4e-10	4.81e-06	GCCACGCCGCAGCCGCAGCCC
LOC101497871	ERF	XP_004498868.1	1155	1175	-	27.2388	5.62e-10	4.81e-06	ATGCCGCCGCTGCCGCAGCCC
LOC101497871	ERF	XP_004509259.1	341	361	-	27.1343	6.05e-10	4.81e-06	TCGCCGCCGCCACAATGCCCA
LOC101500525	ERF	XP_004491318.1	1368	1382	-	26.5556	7.71e-10	4.82e-06	CCACGGCCGCCGCCG
LOC101496212	ERF	XP_004509259.1	337	364	-	26	1.59e-09	4.85e-06	GGGTCGCCGCCGCCACAATGCCCACAAT
LOC101496212	ERF	XP_004506058.1	697	724	-	25.8254	1.82e-09	5.11e-06	CTTTATCCGCCGCCGCCTGGCCGCTGTT
LOC101491273	ERF	XP_004489174.1	138	154	-	27.9365	3.36e-10	5.2e-06	ACGGCGGCGGCGGAATC
LOC101497710	ERF	XP_004502631.1	117	137	-	28.7937	9.75e-11	5.21e-06	GCATCCGCGCCGCCGCCGCAA
LOC101497710	ERF	XP_004491318.1	1365	1385	-	27.7778	2.39e-10	5.22e-06	TCGCCACGGCCGCCGCCGCTC
LOC101497710	ERF	XP_004502631.1	120	140	-	27.5397	2.93e-10	5.22e-06	TCCGCATCCGCGCCGCCGCCG
LOC101497710	ERF	XP_004506058.1	707	727	-	27.0317	4.5e-10	5.3e-06	CCACTTTATCCGCCGCCGCCT
LOC101497710	ERF	XP_004510156.1	332	352	-	26.7619	5.64e-10	5.3e-06	GCACCTGCGCCGGCGCCGCAA
LOC101497710	ERF	XP_004491318.1	1368	1388	-	26.6984	5.94e-10	5.3e-06	ATATCGCCACGGCCGCCGCCG
LOC101497871	ERF	XP_004509259.1	447	467	-	26.7612	7.85e-10	5.36e-06	ACCACGCCGCCGCTGCTGCCC
LOC101512899	ERF	XP_004509259.1	341	361	+	27.9841	2.27e-10	5.4e-06	TGGGCATTGTGGCGGCGGCGA
LOC101491273	ERF	NP_001266141.1	394	410	+	27.1746	6.28e-10	5.75e-06	GCGGCGGCGCCGCAGCT
LOC101491273	ERF	XP_004509259.1	349	365	+	27.1429	6.46e-10	5.75e-06	GTGGCGGCGGCGACCCT
LOC101491273	ERF	XP_004515598.1	26	42	+	26.8095	8.42e-10	5.75e-06	GCGGCGGCCGTGGCGCG
LOC101491273	ERF	XP_004489174.1	135	151	-	26.7778	8.66e-10	5.75e-06	GCGGCGGCGGAATCGCG
LOC101500525	ERF	XP_004491318.1	1365	1379	-	26.127	1.1e-09	6.05e-06	CGGCCGCCGCCGCTC
LOC101497710	ERF	XP_004509259.1	350	370	-	26.1429	9.37e-10	6.68e-06	TGCCCAGGGTCGCCGCCGCCA
LOC101497710	ERF	XP_004492936.1	20	40	-	26.0635	9.99e-10	6.68e-06	TGGTCGCCTGCACCGCCGCGG
LOC101497871	ERF	XP_004506058.1	701	721	-	26.0746	1.26e-09	7.02e-06	TATCCGCCGCCGCCTGGCCGC
LOC101497871	ERF	XP_004510156.1	3	23	-	26	1.32e-09	7.02e-06	CCCCAGCCGCAGCAGCAGCCC
LOC101492500	ERF	XP_004504352.1	188	202	-	26.381	1.03e-09	7.46e-06	GCAGCGGCGGCGGGC
LOC101497871	ERF	XP_004491318.1	648	668	-	25.597	1.74e-09	7.76e-06	CTCCAGCCGCCATCGCTGCCC
LOC101497871	ERF	NP_001351681.1	592	612	+	25.5522	1.79e-09	7.76e-06	GTGGCGCCGCCGGATGCGCCG
LOC101495239	ERF	XP_004510156.1	336	356	-	26.8358	5.73e-10	8.06e-06	TCCGGCACCTGCGCCGGCGCC
LOC101495239	ERF	XP_004510156.1	177	197	-	25.791	1.09e-09	8.06e-06	TCCTGCAGCGCCACCACCACC
LOC101495239	ERF	XP_004515598.1	25	45	-	25.7612	1.11e-09	8.06e-06	CGCCGCGCCACGGCCGCCGCT
LOC101495239	ERF	XP_004498868.1	1156	1176	-	25.6418	1.19e-09	8.06e-06	AATGCCGCCGCTGCCGCAGCC
LOC101495239	ERF	XP_012570542.1	214	234	-	25.5075	1.29e-09	8.06e-06	CGCCACGCCGCAGCCGCAGCC
LOC101491273	ERF	NP_001266141.1	496	512	+	26.0159	1.58e-09	8.15e-06	GCGGCGGCGCCGGAAAT
LOC101491273	ERF	NP_001265927.1	658	674	+	26.0159	1.58e-09	8.15e-06	GCGGCGGCGCCGGAAAT
LOC101493699	ERF	XP_004502631.1	120	139	-	26.7143	5.38e-10	8.7e-06	CCGCATCCGCGCCGCCGCCG
LOC101512899	ERF	NP_001266141.1	488	508	+	26.6032	7.88e-10	8.82e-06	ATGTGGGCGCGGCGGCGCCGG
LOC101512899	ERF	NP_001265927.1	650	670	+	26.6032	7.88e-10	8.82e-06	ATGTGGGCGCGGCGGCGCCGG
LOC101512899	ERF	XP_004509259.1	447	467	+	26.4127	9.29e-10	8.82e-06	GGGCAGCAGCGGCGGCGTGGT
LOC101503531	ERF	XP_004509259.1	447	465	+	26.4921	8.06e-10	9.17e-06	GGGCAGCAGCGGCGGCGTG
LOC101501427	ERF	XP_012573264.1	915	929	-	27.7619	1.74e-10	9.24e-06	GCGCCGCCGCCATCG
LOC101504527	ERF	NP_001351681.1	592	612	-	25.7619	1.54e-09	9.27e-06	CGGCGCATCCGGCGGCGCCAC
LOC101496212	ERF	XP_004489174.1	139	166	+	24.9524	3.59e-09	9.29e-06	ATTCCGCCGCCGCCGTGCGTGGAAGTGC
LOC101512899	ERF	XP_004506058.1	701	721	+	25.7937	1.56e-09	9.37e-06	GCGGCCAGGCGGCGGCGGATA
LOC101512899	ERF	NP_001351681.1	592	612	-	25.7937	1.56e-09	9.37e-06	CGGCGCATCCGGCGGCGCCAC
LOC101512899	ERF	XP_004491318.1	648	668	+	25.7778	1.58e-09	9.37e-06	GGGCAGCGATGGCGGCTGGAG
LOC101493667	ERF	XP_004502631.1	117	131	-	27.3333	2.7e-10	9.38e-06	GCGCCGCCGCCGCAA
LOC101493667	ERF	XP_004489174.1	142	156	+	26.7619	4.86e-10	9.38e-06	CCGCCGCCGCCGTGC
LOC101493667	ERF	XP_004498868.1	219	233	-	26.7302	4.96e-10	9.38e-06	CGGCCGCCGCCGCTA
LOC101496212	ERF	XP_004498868.1	209	236	-	24.8413	3.91e-09	9.38e-06	TTACGGCCGCCGCCGCTAAAATAATCGC
LOC101492500	ERF	XP_004509259.1	346	360	+	25.9524	1.49e-09	9.48e-06	ATTGTGGCGGCGGCG
LOC101500468	ERF	XP_004502631.1	117	131	-	27.3333	2.7e-10	9.5e-06	GCGCCGCCGCCGCAA
LOC101500468	ERF	XP_004489174.1	142	156	+	26.7619	4.86e-10	9.5e-06	CCGCCGCCGCCGTGC
LOC101500468	ERF	XP_004498868.1	219	233	-	26.7302	4.96e-10	9.5e-06	CGGCCGCCGCCGCTA
LOC101500525	ERF	XP_004489174.1	139	153	+	25.4127	2.04e-09	9.95e-06	ATTCCGCCGCCGCCG
LOC101494217	ERF	XP_004502631.1	120	134	-	27.7619	2.93e-10	1.01e-05	TCCGCGCCGCCGCCG
LOC101494217	ERF	XP_004491318.1	1368	1382	-	27.4921	3.86e-10	1.01e-05	CCACGGCCGCCGCCG
LOC101494217	ERF	XP_004512683.1	29	43	-	26.4921	8.64e-10	1.01e-05	CCATCGCCGCCGGCG
LOC101494217	ERF	XP_004510156.1	335	349	-	26.4921	8.64e-10	1.01e-05	CCTGCGCCGGCGCCG
LOC101494217	ERF	XP_004502631.1	117	131	-	26.3651	9.81e-10	1.01e-05	GCGCCGCCGCCGCAA
LOC101494217	ERF	XP_004512683.1	26	40	-	26.1429	1.19e-09	1.01e-05	TCGCCGCCGGCGCCA
LOC101494217	ERF	XP_004489174.1	139	153	+	26.0794	1.23e-09	1.01e-05	ATTCCGCCGCCGCCG
LOC101495239	ERF	NP_001351681.1	594	614	+	24.9104	1.84e-09	1.01e-05	GGCGCCGCCGGATGCGCCGCT
LOC101495239	ERF	XP_004510156.1	333	353	-	24.6866	2.11e-09	1.02e-05	GGCACCTGCGCCGGCGCCGCA
LOC101506937	ERF	NP_001351681.1	591	611	+	25.2063	2.48e-09	1.04e-05	GGTGGCGCCGCCGGATGCGCC
LOC101491273	ERF	XP_004491318.1	1370	1386	+	25.381	2.52e-09	1.04e-05	GCGGCGGCCGTGGCGAT
LOC101506937	ERF	XP_004506058.1	699	719	-	25.1746	2.54e-09	1.04e-05	TCCGCCGCCGCCTGGCCGCTG
LOC101491273	ERF	XP_004516997.1	2586	2602	-	25.2857	2.7e-09	1.04e-05	GCGGCGGCGGTTTCAGG
LOC101491273	ERF	XP_004504712.1	725	741	+	25.2063	2.86e-09	1.04e-05	GCGGCGGCACCGGCAGC
LOC101506937	ERF	XP_004498868.1	247	267	-	25	2.88e-09	1.04e-05	GCCCGCGCCGCAGCCCGCTTC
LOC101506937	ERF	XP_004502631.1	112	132	-	24.9841	2.92e-09	1.04e-05	CGCGCCGCCGCCGCAATACAG
LOC101491273	ERF	XP_004492936.1	22	38	+	25.1746	2.93e-09	1.04e-05	GCGGCGGTGCAGGCGAC
LOC101491273	ERF	XP_004502631.1	122	138	+	25.0635	3.17e-09	1.04e-05	GCGGCGGCGCGGATGCG
LOC101491273	ERF	XP_004509259.1	352	368	+	24.9841	3.35e-09	1.04e-05	GCGGCGGCGACCCTGGG
LOC101501427	ERF	XP_004502631.1	117	131	-	27.0635	3.95e-10	1.05e-05	GCGCCGCCGCCGCAA
LOC101506937	ERF	XP_004489174.1	141	161	+	24.8413	3.24e-09	1.06e-05	TCCGCCGCCGCCGTGCGTGGA
LOC101501427	ERF	XP_004489174.1	142	156	+	26.6984	6.05e-10	1.07e-05	CCGCCGCCGCCGTGC
LOC101493667	ERF	XP_004489174.1	139	153	+	25.9048	1.17e-09	1.08e-05	ATTCCGCCGCCGCCG
LOC101493667	ERF	NP_001266141.1	494	508	-	25.7619	1.35e-09	1.08e-05	CCGGCGCCGCCGCGC
LOC101493667	ERF	NP_001265927.1	656	670	-	25.7619	1.35e-09	1.08e-05	CCGGCGCCGCCGCGC
LOC101493667	ERF	XP_004491318.1	1365	1379	-	25.746	1.36e-09	1.08e-05	CGGCCGCCGCCGCTC
LOC101493667	ERF	XP_004502631.1	120	134	-	25.619	1.53e-09	1.08e-05	TCCGCGCCGCCGCCG
LOC101501427	ERF	XP_004509259.1	347	361	-	26.4444	8.17e-10	1.09e-05	TCGCCGCCGCCACAA
LOC101497871	ERF	XP_004516664.1	1385	1405	-	24.9104	2.73e-09	1.09e-05	GATCCACCGCCATCACGCCCG
LOC101500468	ERF	XP_004489174.1	139	153	+	25.9048	1.17e-09	1.1e-05	ATTCCGCCGCCGCCG
LOC101500468	ERF	NP_001266141.1	494	508	-	25.7619	1.35e-09	1.1e-05	CCGGCGCCGCCGCGC
LOC101500468	ERF	NP_001265927.1	656	670	-	25.7619	1.35e-09	1.1e-05	CCGGCGCCGCCGCGC
LOC101500468	ERF	XP_004491318.1	1365	1379	-	25.746	1.36e-09	1.1e-05	CGGCCGCCGCCGCTC
LOC101500468	ERF	XP_004502631.1	120	134	-	25.619	1.53e-09	1.1e-05	TCCGCGCCGCCGCCG
LOC101496212	ERF	XP_004491318.1	1358	1385	-	24.4603	5.19e-09	1.13e-05	TCGCCACGGCCGCCGCCGCTCTGGTTAC
LOC101496212	ERF	XP_004509259.1	440	467	-	24.4127	5.37e-09	1.13e-05	ACCACGCCGCCGCTGCTGCCCACCACGC
LOC101496212	ERF	XP_004498868.1	1528	1555	-	24.3175	5.76e-09	1.14e-05	CAAACTGCGCCGCCGCGCTCAGCAGGGT
LOC101497710	ERF	XP_012570542.1	216	236	-	25.2222	1.95e-09	1.16e-05	CCCGCCACGCCGCAGCCGCAG
LOC101496212	ERF	XP_004502631.1	110	137	-	24.2063	6.24e-09	1.16e-05	GCATCCGCGCCGCCGCCGCAATACAGTT
LOC101512899	ERF	XP_012573264.1	912	932	+	25.2698	2.38e-09	1.2e-05	CAGCGATGGCGGCGGCGCGCT
LOC101512899	ERF	XP_004515598.1	18	38	+	25.1587	2.6e-09	1.2e-05	CGCGGCGAGCGGCGGCCGTGG
LOC101512899	ERF	XP_004510156.1	3	23	+	25.0794	2.77e-09	1.2e-05	gGGCTGCTGCTGCGGCTGGGG
LOC101496212	ERF	XP_004504352.1	184	211	+	24.0952	6.76e-09	1.2e-05	ACCAGCCCGCCGCCGCTGCATATTCTGG
LOC101496212	ERF	NP_001266141.1	484	511	-	23.8571	8.01e-09	1.22e-05	TTTCCGGCGCCGCCGCGCCCACATGAAT
LOC101496212	ERF	NP_001265927.1	646	673	-	23.8571	8.01e-09	1.22e-05	TTTCCGGCGCCGCCGCGCCCACATGAAT
LOC101496212	ERF	XP_012573264.1	908	935	-	23.8571	8.01e-09	1.22e-05	ATCAGCGCGCCGCCGCCATCGCTGCTAA
LOC101493699	ERF	XP_004510156.1	335	354	-	25.9206	1.03e-09	1.25e-05	CGGCACCTGCGCCGGCGCCG
LOC101492500	ERF	XP_004506058.1	706	720	+	25.4127	2.43e-09	1.3e-05	CAGGCGGCGGCGGAT
LOC101492500	ERF	XP_004509259.1	349	363	+	25.3492	2.55e-09	1.3e-05	GTGGCGGCGGCGACC
LOC101494217	ERF	NP_001266141.1	494	508	-	25.3968	2.06e-09	1.31e-05	CCGGCGCCGCCGCGC
LOC101494217	ERF	NP_001265927.1	656	670	-	25.3968	2.06e-09	1.31e-05	CCGGCGCCGCCGCGC
LOC101500525	ERF	XP_004509259.1	350	364	-	24.9206	3.01e-09	1.32e-05	GGGTCGCCGCCGCCA
LOC101512899	ERF	XP_004509259.1	444	464	+	24.8413	3.34e-09	1.32e-05	GGTGGGCAGCAGCGGCGGCGT
LOC101494217	ERF	XP_004498868.1	219	233	-	25.254	2.33e-09	1.34e-05	CGGCCGCCGCCGCTA
LOC101497710	ERF	NP_001351681.1	595	615	+	24.7937	2.72e-09	1.35e-05	GCGCCGCCGGATGCGCCGCTG
LOC101497710	ERF	XP_004489174.1	133	153	+	24.7619	2.79e-09	1.35e-05	AGCGCGATTCCGCCGCCGCCG
LOC101493699	ERF	XP_012570542.1	287	306	-	25.5238	1.41e-09	1.37e-05	CAGCGCCGGCATCACCGGCG
LOC101491273	ERF	XP_004498868.1	221	237	+	24.4762	4.78e-09	1.39e-05	GCGGCGGCGGCCGTAAA
LOC101512899	ERF	XP_004489174.1	139	159	-	24.5556	4.16e-09	1.41e-05	CACGCACGGCGGCGGCGGAAT
LOC101512899	ERF	XP_004491318.1	1359	1379	+	24.5556	4.16e-09	1.41e-05	TAACCAGAGCGGCGGCGGCCG
LOC101491985	ERF	XP_004491318.1	1368	1382	-	26.8889	2.79e-10	1.44e-05	CCACGGCCGCCGCCG
LOC101504527	ERF	XP_004516997.1	2593	2613	-	24.9683	2.67e-09	1.45e-05	CCACAGATACAGCGGCGGCGG
LOC101510560	ERF	XP_004506744.1	595	609	+	25.1111	9.72e-10	1.49e-05	CTGCCGTGGCCGGCG
LOC101510560	ERF	XP_004509259.1	206	220	-	24.8889	1.25e-09	1.49e-05	TGGTCGCCGCCGGCC
LOC101510560	ERF	XP_004491318.1	1368	1382	-	24.6984	1.54e-09	1.49e-05	CCACGGCCGCCGCCG
LOC101494217	ERF	XP_012573264.1	915	929	-	24.9841	2.86e-09	1.49e-05	GCGCCGCCGCCATCG
LOC101506937	ERF	XP_004498868.1	1153	1173	-	24.254	4.93e-09	1.5e-05	GCCGCCGCTGCCGCAGCCCAG
LOC101500525	ERF	NP_001266141.1	392	406	-	24.619	3.8e-09	1.51e-05	GCGGCGCCGCCGCGC
LOC101506937	ERF	XP_004516664.1	1383	1403	-	24.1111	5.45e-09	1.55e-05	TCCACCGCCATCACGCCCGGC
LOC101500525	ERF	XP_004510156.1	332	346	-	24.4603	4.33e-09	1.58e-05	GCGCCGGCGCCGCAA
LOC101491273	ERF	XP_004498868.1	1540	1556	+	24.2063	5.77e-09	1.58e-05	GCGGCGGCGCAGTTTGG
LOC101506937	ERF	XP_004516997.1	2592	2612	+	23.9841	5.96e-09	1.58e-05	ACCGCCGCCGCTGTATCTGTG
LOC101506937	ERF	XP_004485405.1	60	80	-	23.9048	6.3e-09	1.58e-05	CGCAGCGCCGCATACGCCGCA
LOC101506937	ERF	XP_004504352.1	189	209	+	23.8254	6.65e-09	1.58e-05	CCCGCCGCCGCTGCATATTCT
LOC101497871	ERF	XP_004489174.1	139	159	+	24.194	4.34e-09	1.59e-05	ATTCCGCCGCCGCCGTGCGTG
LOC101494217	ERF	XP_004489174.1	142	156	+	24.7619	3.34e-09	1.6e-05	CCGCCGCCGCCGTGC
LOC101512899	ERF	XP_004498868.1	246	266	+	24.2381	5.29e-09	1.61e-05	GGAAGCGGGCTGCGGCGCGGG
LOC101512899	ERF	XP_012570542.1	213	233	+	24.1905	5.49e-09	1.61e-05	GGGCTGCGGCTGCGGCGTGGC
LOC101512899	ERF	XP_004502631.1	114	134	+	24.0952	5.89e-09	1.61e-05	GTATTGCGGCGGCGGCGCGGA
LOC101512899	ERF	XP_004498868.1	1155	1175	+	24.0476	6.11e-09	1.61e-05	GGGCTGCGGCAGCGGCGGCAT
LOC101496212	ERF	XP_004506058.1	700	727	-	23.381	1.12e-08	1.63e-05	CCACTTTATCCGCCGCCGCCTGGCCGCT
LOC101512899	ERF	XP_004512683.1	51	71	+	23.8889	6.87e-09	1.65e-05	GGGCAGCTATGGCGGCAGCGT
LOC101512899	ERF	XP_004491318.1	1362	1382	+	23.873	6.95e-09	1.65e-05	CCAGAGCGGCGGCGGCCGTGG
LOC101500525	ERF	XP_004504712.1	723	737	-	24.2698	5e-09	1.67e-05	CCGGTGCCGCCGCCC
LOC101500525	ERF	XP_004506058.1	707	721	-	24.1905	5.33e-09	1.67e-05	TATCCGCCGCCGCCT
LOC101496212	ERF	XP_004504712.1	733	760	-	23.2857	1.19e-08	1.67e-05	GTTTCATCGCCGCCGCAAAGCTGCCGGT
LOC101496212	ERF	XP_004498868.1	928	955	-	23.2222	1.24e-08	1.67e-05	ACATATCCGCCGCCACGCCTTCGCTCAT
LOC101504527	ERF	XP_004510156.1	3	23	+	24.5079	3.67e-09	1.71e-05	gGGCTGCTGCTGCGGCTGGGG
LOC101504527	ERF	XP_012570542.1	287	307	+	24.3492	4.08e-09	1.71e-05	CGCCGGTGatgCCGGCGCTGA
LOC101504527	ERF	XP_004510156.1	335	355	+	24.3492	4.08e-09	1.71e-05	CGGCGCCGGCGCAGGTGCCGG
LOC101506937	ERF	XP_012570542.1	214	234	-	23.5714	7.93e-09	1.75e-05	CGCCACGCCGCAGCCGCAGCC
LOC101506937	ERF	XP_004512683.1	24	44	-	23.5079	8.28e-09	1.75e-05	ACCATCGCCGCCGGCGCCAGT
LOC101506937	ERF	XP_004510052.1	829	849	-	23.4444	8.65e-09	1.75e-05	CGCGCCGCCGCACACCGCGTT
LOC101507986	ERF	XP_012573264.1	910	930	+	26.7761	7.33e-10	1.77e-05	AGCAGCGATGGCGGCGGCGCG
LOC101507986	ERF	XP_004510156.1	381	401	+	25.6866	1.61e-09	1.79e-05	GGCGCTGCCGCTGatgGTGGA
LOC101507986	ERF	XP_004491318.1	1366	1386	+	25.5821	1.74e-09	1.79e-05	AGCGGCGGCGGCCGTGGCGAT
LOC101507986	ERF	XP_004516664.1	1383	1403	+	25.4925	1.85e-09	1.79e-05	GCCGGGCGTGatgGCGGTGGA
LOC101495239	ERF	XP_004506058.1	708	728	-	23.4776	4.26e-09	1.79e-05	TCCACTTTATCCGCCGCCGCC
LOC101495239	ERF	XP_004491318.1	1366	1386	-	23.3731	4.52e-09	1.79e-05	ATCGCCACGGCCGCCGCCGCT
LOC101492500	ERF	NP_001266141.1	391	405	+	24.746	4.13e-09	1.8e-05	AGCGCGGCGGCGCCG
LOC101492500	ERF	XP_004512683.1	28	42	+	24.7143	4.24e-09	1.8e-05	GCGCCGGCGGCGatg
LOC101500525	ERF	XP_004492936.1	20	34	-	24	6.16e-09	1.8e-05	CCTGCACCGCCGCGG
LOC101497871	ERF	XP_004510052.1	482	502	-	23.8358	5.44e-09	1.81e-05	TCGCCACCACCGCCACATCGC
LOC101497871	ERF	XP_004516997.1	2590	2610	+	23.7164	5.87e-09	1.81e-05	AAACCGCCGCCGCTGTATCTG
LOC101497871	ERF	XP_004512683.1	23	43	-	23.6567	6.09e-09	1.81e-05	CCATCGCCGCCGGCGCCAGTT
LOC101497871	ERF	XP_004498868.1	932	952	-	23.5672	6.44e-09	1.81e-05	TATCCGCCGCCACGCCTTCGC
LOC101512899	ERF	XP_004489174.1	142	162	-	23.6825	7.99e-09	1.81e-05	TTCCACGCACGGCGGCGGCGG
LOC101510560	ERF	XP_004515598.1	27	41	-	24.3333	2.33e-09	1.82e-05	GCGCCACGGCCGCCG
LOC101494217	ERF	XP_004506058.1	707	721	-	24.4921	4.11e-09	1.82e-05	TATCCGCCGCCGCCT
LOC101507986	ERF	XP_004491518.1	513	533	+	25.0597	2.51e-09	1.86e-05	gCCGCCGTATGCGGTGGTGGA
LOC101507986	ERF	NP_001351681.1	594	614	-	24.9552	2.7e-09	1.86e-05	AGCGGCGCATCCGGCGGCGCC
LOC101504527	ERF	XP_004512683.1	26	46	+	24.1111	4.79e-09	1.86e-05	TGGCGCCGGCGGCGatgGTGA
LOC101496212	ERF	XP_004504712.1	710	737	-	22.9524	1.49e-08	1.87e-05	CCGGTGCCGCCGCCCACATCCAGGCCCA
LOC101496212	ERF	XP_012573264.1	1241	1268	-	22.9365	1.51e-08	1.87e-05	CTATCATCGCCGCCTTCGCTAAACGGCG
LOC101491273	ERF	XP_004506058.1	709	725	+	23.8095	7.57e-09	1.89e-05	GCGGCGGCGGATAAAGT
LOC101491273	ERF	XP_004510052.1	487	503	+	23.7778	7.73e-09	1.89e-05	GTGGCGGTGGTGGCGAG
LOC101501427	ERF	NP_001266141.1	494	508	-	25.4444	2.18e-09	1.93e-05	CCGGCGCCGCCGCGC
LOC101501427	ERF	NP_001265927.1	656	670	-	25.4444	2.18e-09	1.93e-05	CCGGCGCCGCCGCGC
LOC101506937	ERF	XP_004512683.1	21	41	-	23.2222	1.01e-08	1.95e-05	ATCGCCGCCGGCGCCAGTTCT
LOC101512899	ERF	XP_004516997.1	2590	2610	-	23.5079	9.06e-09	1.96e-05	CAGATACAGCGGCGGCGGTTT
LOC101492500	ERF	XP_004489174.1	143	157	-	24.4762	5.07e-09	1.98e-05	CGCACGGCGGCGGCG
LOC101512899	ERF	XP_004502631.1	111	131	+	23.381	9.93e-09	1.99e-05	ACTGTATTGCGGCGGCGGCGC
LOC101512899	ERF	XP_004516997.1	2593	2613	-	23.3651	1e-08	1.99e-05	CCACAGATACAGCGGCGGCGG
LOC101506937	ERF	XP_004485405.1	1042	1062	-	23.0952	1.1e-08	2.03e-05	GCTGCCGCCGCTACGGCCATA
LOC101507986	ERF	XP_004510052.1	483	503	+	24.6269	3.39e-09	2.04e-05	CGATGTGGCGGTGGTGGCGAG
LOC101504527	ERF	XP_004504352.1	190	210	-	23.873	5.63e-09	2.04e-05	CAGAATATGCAGCGGCGGCGG
LOC101496212	ERF	XP_004515076.1	272	299	-	22.6667	1.8e-08	2.07e-05	ATCAGATCGCCGCCTTTGCCGCACGCCA
LOC101496212	ERF	XP_004516997.1	692	719	-	22.5556	1.93e-08	2.07e-05	AGCACTTCGCCGCCGTTATCGCAAATCG
LOC101496212	ERF	XP_012570542.1	209	236	-	22.5238	1.97e-08	2.07e-05	CCCGCCACGCCGCAGCCGCAGCCCAGTT
LOC101496212	ERF	XP_004515598.1	14	41	-	22.4921	2.01e-08	2.07e-05	GCGCCACGGCCGCCGCTCGCCGCGTTTT
LOC101496212	ERF	XP_004504712.1	722	749	-	22.4921	2.01e-08	2.07e-05	GCCGCAAAGCTGCCGGTGCCGCCGCCCA
LOC101496212	ERF	XP_004504712.1	971	998	-	22.4762	2.04e-08	2.07e-05	CACAGAAAGCCGCCGCCACGCAGCACAC
LOC101503531	ERF	XP_004506058.1	701	719	+	24.7619	3.23e-09	2.08e-05	GCGGCCAGGCGGCGGCGGA
LOC101503531	ERF	XP_004489174.1	141	159	-	24.7143	3.35e-09	2.08e-05	CACGCACGGCGGCGGCGGA
LOC101503531	ERF	XP_004510052.1	482	500	+	24.4921	3.97e-09	2.08e-05	GCGATGTGGCGGTGGTGGC
LOC101503531	ERF	XP_004516997.1	2592	2610	-	24.3651	4.38e-09	2.08e-05	CAGATACAGCGGCGGCGGT
LOC101503531	ERF	NP_001351681.1	594	612	-	24.2222	4.87e-09	2.08e-05	CGGCGCATCCGGCGGCGCC
LOC101503531	ERF	XP_004489174.1	807	825	+	24.0476	5.55e-09	2.08e-05	TGGCGTGGGCGGCGGCACC
LOC101503531	ERF	XP_004502631.1	114	132	+	23.9365	6.02e-09	2.08e-05	GTATTGCGGCGGCGGCGCG
LOC101503531	ERF	XP_004485405.1	1044	1062	+	23.9048	6.16e-09	2.08e-05	TGGCCGTAGCGGCGGCAGC
LOC101503531	ERF	XP_004491518.1	515	533	+	23.8413	6.46e-09	2.08e-05	CGCCGTATGCGGTGGTGGA
LOC101503531	ERF	XP_004509259.1	344	362	+	23.7302	7e-09	2.08e-05	GCATTGTGGCGGCGGCGAC
LOC101503531	ERF	XP_004510052.1	831	849	+	23.6349	7.5e-09	2.08e-05	CGCGGTGTGCGGCGGCGCG
LOC101503531	ERF	XP_004512683.1	26	44	+	23.5873	7.76e-09	2.08e-05	TGGCGCCGGCGGCGatgGT
LOC101503531	ERF	XP_004510156.1	332	350	+	23.5873	7.76e-09	2.08e-05	TTGCGGCGCCGGCGCAGGT
LOC101497871	ERF	XP_004512683.1	51	71	-	23.1194	8.51e-09	2.09e-05	ACGCTGCCGCCATAGCTGCCC
LOC101497871	ERF	XP_004502631.1	114	134	-	23.1194	8.51e-09	2.09e-05	TCCGCGCCGCCGCCGCAATAC
LOC101497871	ERF	XP_004485405.1	1044	1064	-	23.0746	8.75e-09	2.09e-05	ATGCTGCCGCCGCTACGGCCA
LOC101491273	ERF	XP_004504352.1	183	199	-	23.5556	8.99e-09	2.09e-05	GCGGCGGCGGGCTGGTC
LOC101497710	ERF	XP_004489174.1	136	156	+	23.9365	5.21e-09	2.11e-05	GCGATTCCGCCGCCGCCGTGC
LOC101497710	ERF	XP_004506058.1	710	730	-	23.9206	5.27e-09	2.11e-05	CATCCACTTTATCCGCCGCCG
LOC101497710	ERF	NP_001266141.1	395	415	-	23.8571	5.52e-09	2.11e-05	CTTTCAGCTGCGGCGCCGCCG
LOC101506937	ERF	NP_001266141.1	486	506	-	22.9048	1.24e-08	2.11e-05	GGCGCCGCCGCGCCCACATGA
LOC101506937	ERF	NP_001265927.1	648	668	-	22.9048	1.24e-08	2.11e-05	GGCGCCGCCGCGCCCACATGA
LOC101506937	ERF	XP_004510156.1	4	24	-	22.8571	1.28e-08	2.11e-05	GCCCCAGCCGCAGCAGCAGCC
LOC101497710	ERF	XP_004510052.1	488	508	-	23.6825	6.29e-09	2.12e-05	CGCTGCTCGCCACCACCGCCA
LOC101497710	ERF	XP_004504712.1	723	743	-	23.6349	6.51e-09	2.12e-05	AAGCTGCCGGTGCCGCCGCCC
LOC101497710	ERF	XP_004509259.1	347	367	-	23.4762	7.32e-09	2.12e-05	CCAGGGTCGCCGCCGCCACAA
LOC101497710	ERF	XP_004515598.1	24	44	-	23.4444	7.49e-09	2.12e-05	GCCGCGCCACGGCCGCCGCTC
LOC101497710	ERF	XP_004491318.1	654	674	-	23.4286	7.58e-09	2.12e-05	CCCGCGCTCCAGCCGCCATCG
LOC101497710	ERF	NP_001351681.1	590	610	-	23.3651	7.94e-09	2.12e-05	GCGCATCCGGCGGCGCCACCA
LOC101492500	ERF	XP_004498868.1	218	232	+	24.2698	5.97e-09	2.15e-05	TTAGCGGCGGCGGCC
LOC101492500	ERF	XP_004509259.1	452	466	+	24.1111	6.77e-09	2.15e-05	GCAGCGGCGGCGTGG
LOC101492500	ERF	XP_004516997.1	2591	2605	-	24.1111	6.77e-09	2.15e-05	ACAGCGGCGGCGGTT
LOC101500525	ERF	XP_012573264.1	915	929	-	23.6508	8.07e-09	2.17e-05	GCGCCGCCGCCATCG
LOC101500525	ERF	NP_001266141.1	395	409	-	23.5714	8.49e-09	2.17e-05	GCTGCGGCGCCGCCG
LOC101500525	ERF	XP_004512683.1	29	43	-	23.5079	8.93e-09	2.17e-05	CCATCGCCGCCGGCG
LOC101504527	ERF	XP_004489174.1	142	162	-	23.6349	6.59e-09	2.2e-05	TTCCACGCACGGCGGCGGCGG
LOC101504527	ERF	XP_004516664.1	1382	1402	+	23.5714	6.87e-09	2.2e-05	TGCCGGGCGTGatgGCGGTGG
LOC101504527	ERF	XP_004512683.1	51	71	+	23.4762	7.32e-09	2.21e-05	GGGCAGCTATGGCGGCAGCGT
LOC101512899	ERF	XP_004516997.1	696	716	+	23.1429	1.18e-08	2.22e-05	TTGCGATAACGGCGGCGAAGT
LOC101512899	ERF	XP_004502631.1	108	128	+	23.0952	1.22e-08	2.22e-05	CGAACTGTATTGCGGCGGCGG
LOC101506937	ERF	XP_004510052.1	480	500	-	22.6349	1.49e-08	2.25e-05	GCCACCACCGCCACATCGCCA
LOC101506937	ERF	XP_004489174.1	805	825	-	22.5714	1.55e-08	2.25e-05	GGTGCCGCCGCCCACGCCAAA
LOC101506937	ERF	XP_004498868.1	211	231	-	22.4921	1.64e-08	2.25e-05	GCCGCCGCCGCTAAAATAATC
LOC101506937	ERF	XP_004506058.1	702	722	-	22.4921	1.64e-08	2.25e-05	TTATCCGCCGCCGCCTGGCCG
LOC101506937	ERF	XP_004491318.1	1360	1380	-	22.4921	1.64e-08	2.25e-05	ACGGCCGCCGCCGCTCTGGTT
LOC101497871	ERF	XP_004516664.1	1382	1402	-	22.7463	1.07e-08	2.28e-05	CCACCGCCATCACGCCCGGCA
LOC101497871	ERF	XP_004504712.1	717	737	-	22.7164	1.09e-08	2.28e-05	CCGGTGCCGCCGCCCACATCC
LOC101497871	ERF	XP_004509259.1	444	464	-	22.7015	1.1e-08	2.28e-05	ACGCCGCCGCTGCTGCCCACC
LOC101493667	ERF	XP_004510156.1	332	346	-	24.6349	3.78e-09	2.29e-05	GCGCCGGCGCCGCAA
LOC101493667	ERF	XP_004512683.1	29	43	-	24.5397	4.04e-09	2.29e-05	CCATCGCCGCCGGCG
LOC101495239	ERF	XP_004504352.1	906	926	-	22.7761	6.35e-09	2.31e-05	TCCGCATCCAGCACCACCGCA
LOC101500468	ERF	XP_004510156.1	332	346	-	24.6349	3.78e-09	2.32e-05	GCGCCGGCGCCGCAA
LOC101500468	ERF	XP_004512683.1	29	43	-	24.5397	4.04e-09	2.32e-05	CCATCGCCGCCGGCG
LOC101512420	ERF	XP_004510052.1	487	499	+	23.9048	4.87e-10	2.34e-05	GTGGCGGTGGTGG
LOC101507986	ERF	XP_004498868.1	1153	1173	+	24.2537	4.37e-09	2.34e-05	CTGGGCTGCGGCAGCGGCGGC
LOC101496212	ERF	XP_004510052.1	800	827	-	22.1905	2.44e-08	2.41e-05	AGGCTAAAGCCGCCGCTATAGCAGCACA
LOC101506937	ERF	XP_004515598.1	25	45	-	22.3016	1.85e-08	2.42e-05	CGCCGCGCCACGGCCGCCGCT
LOC101506937	ERF	XP_004509259.1	448	468	-	22.2381	1.93e-08	2.42e-05	CACCACGCCGCCGCTGCTGCC
LOC101506937	ERF	XP_012570542.1	288	308	-	22.1905	1.99e-08	2.42e-05	TTCAGCGCCGGCATCACCGGC
LOC101506937	ERF	XP_004510156.1	330	350	-	22.1905	1.99e-08	2.42e-05	ACCTGCGCCGGCGCCGCAAAG
LOC101506937	ERF	XP_004512683.1	27	47	-	22.1429	2.05e-08	2.43e-05	TTCACCATCGCCGCCGGCGCC
LOC101501427	ERF	XP_004491318.1	1365	1379	-	24.9683	3.31e-09	2.47e-05	CGGCCGCCGCCGCTC
LOC101501427	ERF	XP_004498868.1	219	233	-	24.8413	3.71e-09	2.47e-05	CGGCCGCCGCCGCTA
LOC101501427	ERF	XP_004502631.1	120	134	-	24.6984	4.19e-09	2.48e-05	TCCGCGCCGCCGCCG
LOC101493667	ERF	XP_004506058.1	707	721	-	24.3333	4.83e-09	2.49e-05	TATCCGCCGCCGCCT
LOC101506937	ERF	XP_004502631.1	109	129	-	22.0635	2.16e-08	2.49e-05	GCCGCCGCCGCAATACAGTTC
LOC101495239	ERF	XP_004510156.1	4	24	-	22.3731	7.96e-09	2.5e-05	GCCCCAGCCGCAGCAGCAGCC
LOC101495239	ERF	XP_004510052.1	483	503	-	22.2985	8.3e-09	2.5e-05	CTCGCCACCACCGCCACATCG
LOC101495239	ERF	XP_012570542.1	285	305	-	22.2388	8.59e-09	2.5e-05	AGCGCCGGCATCACCGGCGCA
LOC101506937	ERF	XP_004491518.1	546	566	-	22.0159	2.23e-08	2.5e-05	CGCAGCGCCGCTTTCGCCAGC
LOC101494217	ERF	NP_001266141.1	395	409	-	23.9206	6.13e-09	2.51e-05	GCTGCGGCGCCGCCG
LOC101500468	ERF	XP_004506058.1	707	721	-	24.3333	4.83e-09	2.52e-05	TATCCGCCGCCGCCT
LOC101493699	ERF	XP_004491318.1	1365	1384	-	24.3968	3.4e-09	2.59e-05	CGCCACGGCCGCCGCCGCTC
LOC101493699	ERF	XP_004498868.1	1155	1174	-	24.1587	4.07e-09	2.59e-05	TGCCGCCGCTGCCGCAGCCC
LOC101493699	ERF	XP_004512683.1	29	48	-	24.0159	4.54e-09	2.59e-05	TTTCACCATCGCCGCCGGCG
LOC101493699	ERF	XP_004489174.1	134	153	+	23.873	5.05e-09	2.59e-05	GCGCGATTCCGCCGCCGCCG
LOC101493699	ERF	XP_012573264.1	909	928	-	23.7778	5.43e-09	2.59e-05	CGCCGCCGCCATCGCTGCTA
LOC101493699	ERF	XP_004510156.1	405	424	-	23.5873	6.27e-09	2.59e-05	AACGGCCGCTGCCGCAGCCA
LOC101493699	ERF	XP_004510156.1	332	351	-	23.5556	6.41e-09	2.59e-05	CACCTGCGCCGGCGCCGCAA
LOC101494217	ERF	XP_004492936.1	20	34	-	23.7778	6.76e-09	2.59e-05	CCTGCACCGCCGCGG
LOC101497871	ERF	XP_004504352.1	190	210	+	22.403	1.32e-08	2.62e-05	CCGCCGCCGCTGCATATTCTG
LOC101500525	ERF	XP_004504712.1	743	757	-	23.1746	1.15e-08	2.64e-05	TCATCGCCGCCGCAA
LOC101497871	ERF	XP_004506058.1	213	233	-	22.2388	1.45e-08	2.64e-05	CTCACGCCGCAGCCCGCGCCC
LOC101497871	ERF	XP_004489174.1	142	162	+	22.194	1.49e-08	2.64e-05	CCGCCGCCGCCGTGCGTGGAA
LOC101497871	ERF	XP_004498868.1	1532	1552	-	22.1493	1.53e-08	2.64e-05	ACTGCGCCGCCGCGCTCAGCA
LOC101497871	ERF	XP_004498868.1	246	266	-	22.1343	1.55e-08	2.64e-05	CCCGCGCCGCAGCCCGCTTCC
LOC101491273	ERF	XP_004512683.1	31	47	+	23.1111	1.2e-08	2.66e-05	CCGGCGGCGatgGTGAA
LOC101491273	ERF	XP_012573264.1	917	933	+	23.0317	1.26e-08	2.67e-05	ATGGCGGCGGCGCGCTG
LOC101496258	ERF	XP_004509259.1	204	217	+	23.9206	6.51e-10	2.71e-05	GTGGCCGGCGGCGA
LOC101495239	ERF	XP_004499918.1	304	324	-	21.8657	1.06e-08	2.77e-05	CGGGCCGCCAATGCCGCAGCC
LOC101495239	ERF	XP_004491318.1	1363	1383	-	21.7761	1.11e-08	2.77e-05	GCCACGGCCGCCGCCGCTCTG
LOC101495239	ERF	XP_004504712.1	724	744	-	21.6716	1.18e-08	2.77e-05	AAAGCTGCCGGTGCCGCCGCC
LOC101495239	ERF	NP_001351681.1	588	608	-	21.6269	1.21e-08	2.77e-05	GCATCCGGCGGCGCCACCACG
LOC101506937	ERF	XP_004491518.1	513	533	-	21.7619	2.62e-08	2.77e-05	TCCACCACCGCATACGGCGGC
LOC101506937	ERF	XP_004502631.1	115	135	-	21.7302	2.68e-08	2.77e-05	ATCCGCGCCGCCGCCGCAATA
LOC101506937	ERF	XP_004491318.1	1357	1377	-	21.7302	2.68e-08	2.77e-05	GCCGCCGCCGCTCTGGTTACG
LOC101506937	ERF	XP_004491318.1	939	959	-	21.6984	2.73e-08	2.77e-05	CCCGGCGCCGCGCACATATCC
LOC101491273	ERF	XP_004491318.1	1054	1070	+	22.8889	1.39e-08	2.8e-05	CTGGCGGCGGAACTGGG
LOC101510560	ERF	XP_004504712.1	723	737	-	23.7143	4.34e-09	2.81e-05	CCGGTGCCGCCGCCC
LOC101491273	ERF	XP_012573264.1	914	930	+	22.8095	1.46e-08	2.82e-05	GCGATGGCGGCGGCGCG
LOC101494217	ERF	NP_001351681.1	590	604	-	23.5556	7.89e-09	2.83e-05	CCGGCGGCGCCACCA
LOC101493667	ERF	XP_004509259.1	350	364	-	24.0635	6e-09	2.84e-05	GGGTCGCCGCCGCCA
LOC101493699	ERF	NP_001351681.1	590	609	-	23.3175	7.65e-09	2.86e-05	CGCATCCGGCGGCGCCACCA
LOC101500468	ERF	XP_004509259.1	350	364	-	24.0635	6e-09	2.87e-05	GGGTCGCCGCCGCCA
LOC101506937	ERF	XP_012573264.1	907	927	-	21.5873	2.93e-08	2.87e-05	GCCGCCGCCATCGCTGCTAAT
LOC101506937	ERF	XP_004498868.1	1533	1553	-	21.5714	2.96e-08	2.87e-05	AACTGCGCCGCCGCGCTCAGC
LOC101491985	ERF	XP_004510052.1	488	502	-	25.6349	1.12e-09	2.88e-05	TCGCCACCACCGCCA
LOC101512899	ERF	XP_004504712.1	788	808	+	22.6667	1.64e-08	2.88e-05	CCatgAACGTGGCGGCGCCGT
LOC101494217	ERF	XP_004504712.1	723	737	-	23.4444	8.59e-09	2.9e-05	CCGGTGCCGCCGCCC
LOC101512899	ERF	XP_004510052.1	187	207	-	22.5714	1.75e-08	2.9e-05	GCCGGTTTTCGGCGGCGGACG
LOC101512899	ERF	XP_004512683.1	23	43	+	22.5556	1.77e-08	2.9e-05	AACTGGCGCCGGCGGCGatgG
LOC101500525	ERF	XP_004504352.1	187	201	+	22.9524	1.33e-08	2.91e-05	AGCCCGCCGCCGCTG
LOC101504527	ERF	XP_004512683.1	23	43	+	22.9683	1.02e-08	2.92e-05	AACTGGCGCCGGCGGCGatgG
LOC101504527	ERF	XP_004485405.1	1041	1061	+	22.8889	1.07e-08	2.92e-05	GTATGGCCGTAGCGGCGGCAG
LOC101503531	ERF	XP_004502631.1	117	135	+	23.0159	1.17e-08	2.95e-05	TTGCGGCGGCGGCGCGGAT
LOC101511508	ERF	XP_004510052.1	488	502	-	24.9683	6.44e-10	2.97e-05	TCGCCACCACCGCCA
LOC101503531	ERF	XP_004485405.1	62	80	+	22.8413	1.32e-08	3.03e-05	CGGCGTATGCGGCGCTGCG
LOC101503531	ERF	XP_012573264.1	909	927	+	22.8095	1.35e-08	3.03e-05	TAGCAGCGATGGCGGCGGC
LOC101503531	ERF	XP_004491318.1	1653	1671	-	22.7302	1.43e-08	3.03e-05	CGGATGCTGCGGCGCCAGG
LOC101503531	ERF	XP_004498868.1	249	267	+	22.6984	1.46e-08	3.03e-05	AGCGGGCTGCGGCGCGGGC
LOC101492500	ERF	XP_004504712.1	793	807	+	23.5714	1.02e-08	3.04e-05	AACGTGGCGGCGCCG
LOC101492500	ERF	XP_004491318.1	1364	1378	+	23.4921	1.08e-08	3.04e-05	AGAGCGGCGGCGGCC
LOC101495239	ERF	XP_004509259.1	348	368	-	21.3582	1.4e-08	3.05e-05	CCCAGGGTCGCCGCCGCCACA
LOC101492500	ERF	XP_004498868.1	1537	1551	+	23.3968	1.15e-08	3.07e-05	AGCGCGGCGGCGCAG
LOC101510560	ERF	XP_004489174.1	139	153	+	23.4762	5.54e-09	3.08e-05	ATTCCGCCGCCGCCG
LOC101493699	ERF	NP_001351681.1	596	615	+	23.1111	8.91e-09	3.09e-05	CGCCGCCGGATGCGCCGCTG
LOC101497871	ERF	XP_004485405.1	2637	2657	-	21.7313	1.96e-08	3.13e-05	TCCCAGCCGCCCCAGCCGTTG
LOC101497871	ERF	XP_004498868.1	1158	1178	-	21.7164	1.98e-08	3.13e-05	CAAATGCCGCCGCTGCCGCAG
LOC101497871	ERF	XP_004502631.1	111	131	-	21.6716	2.03e-08	3.13e-05	GCGCCGCCGCCGCAATACAGT
LOC101495239	ERF	XP_004509259.1	448	468	-	21.1791	1.54e-08	3.14e-05	CACCACGCCGCCGCTGCTGCC
LOC101495239	ERF	NP_001351681.1	597	617	+	21.1343	1.58e-08	3.14e-05	GCCGCCGGATGCGCCGCTGCG
LOC101506937	ERF	NP_001351681.1	285	305	-	21.381	3.34e-08	3.16e-05	GGCAGCGCCAGCGCGGTCGCC
LOC101500525	ERF	XP_004516997.1	2590	2604	+	22.7302	1.57e-08	3.17e-05	AAACCGCCGCCGCTG
LOC101500525	ERF	NP_001266141.1	394	408	+	22.7143	1.59e-08	3.17e-05	GCGGCGGCGCCGCAG
LOC101500525	ERF	XP_012570542.1	422	436	-	22.5079	1.84e-08	3.23e-05	CCACATCCGCCGCAA
LOC101500525	ERF	NP_001266141.1	497	511	-	22.5079	1.84e-08	3.23e-05	TTTCCGGCGCCGCCG
LOC101500525	ERF	NP_001265927.1	659	673	-	22.5079	1.84e-08	3.23e-05	TTTCCGGCGCCGCCG
LOC101497710	ERF	XP_004512683.1	29	49	-	22.7143	1.27e-08	3.24e-05	GTTTCACCATCGCCGCCGGCG
LOC101512899	ERF	XP_004516664.1	1385	1405	+	22.3333	2.06e-08	3.26e-05	CGGGCGTGatgGCGGTGGATC
LOC101495239	ERF	XP_004489174.1	135	155	+	20.9701	1.73e-08	3.28e-05	CGCGATTCCGCCGCCGCCGTG
LOC101489276	ERF	XP_004489174.1	142	152	+	26.619	1.22e-09	3.3e-05	CCGCCGCCGCC
LOC101489276	ERF	XP_004506058.1	708	718	-	26.619	1.22e-09	3.3e-05	CCGCCGCCGCC
LOC101507986	ERF	XP_004512683.1	21	41	+	23.5821	6.86e-09	3.31e-05	AGAACTGGCGCCGGCGGCGat
LOC101493667	ERF	XP_004504712.1	723	737	-	23.7778	7.59e-09	3.31e-05	CCGGTGCCGCCGCCC
LOC101493699	ERF	NP_001351681.1	593	612	-	22.9206	1.02e-08	3.31e-05	CGGCGCATCCGGCGGCGCCA
LOC101507986	ERF	XP_004491318.1	1363	1383	+	23.4328	7.58e-09	3.32e-05	CAGAGCGGCGGCGGCCGTGGC
LOC101500468	ERF	XP_004504712.1	723	737	-	23.7778	7.59e-09	3.35e-05	CCGGTGCCGCCGCCC
LOC101504527	ERF	XP_004491318.1	648	668	+	22.5873	1.3e-08	3.35e-05	GGGCAGCGATGGCGGCTGGAG
LOC101504527	ERF	XP_012570542.1	213	233	+	22.5238	1.36e-08	3.35e-05	GGGCTGCGGCTGCGGCGTGGC
LOC101494217	ERF	XP_004510052.1	488	502	-	23.0159	1.16e-08	3.37e-05	TCGCCACCACCGCCA
LOC101494217	ERF	NP_001266141.1	497	511	-	22.9683	1.2e-08	3.37e-05	TTTCCGGCGCCGCCG
LOC101494217	ERF	NP_001265927.1	659	673	-	22.9683	1.2e-08	3.37e-05	TTTCCGGCGCCGCCG
LOC101494217	ERF	XP_004509259.1	350	364	-	22.9048	1.25e-08	3.37e-05	GGGTCGCCGCCGCCA
LOC101494217	ERF	XP_004491318.1	1365	1379	-	22.8571	1.29e-08	3.37e-05	CGGCCGCCGCCGCTC
LOC101495239	ERF	NP_001351681.1	591	611	-	20.8358	1.86e-08	3.38e-05	GGCGCATCCGGCGGCGCCACC
LOC101493667	ERF	NP_001266141.1	395	409	-	23.5079	9.56e-09	3.41e-05	GCTGCGGCGCCGCCG
LOC101493667	ERF	NP_001266141.1	497	511	-	23.4444	1.01e-08	3.41e-05	TTTCCGGCGCCGCCG
LOC101493667	ERF	NP_001265927.1	659	673	-	23.4444	1.01e-08	3.41e-05	TTTCCGGCGCCGCCG
LOC101493667	ERF	XP_004516997.1	2590	2604	+	23.4286	1.02e-08	3.41e-05	AAACCGCCGCCGCTG
LOC101493667	ERF	NP_001266141.1	392	406	-	23.3492	1.09e-08	3.44e-05	GCGGCGCCGCCGCGC
LOC101500468	ERF	NP_001266141.1	395	409	-	23.5079	9.56e-09	3.45e-05	GCTGCGGCGCCGCCG
LOC101500468	ERF	NP_001266141.1	497	511	-	23.4444	1.01e-08	3.45e-05	TTTCCGGCGCCGCCG
LOC101500468	ERF	NP_001265927.1	659	673	-	23.4444	1.01e-08	3.45e-05	TTTCCGGCGCCGCCG
LOC101500468	ERF	XP_004516997.1	2590	2604	+	23.4286	1.02e-08	3.45e-05	AAACCGCCGCCGCTG
LOC101510560	ERF	XP_004510156.1	338	352	-	23.2222	7.15e-09	3.46e-05	GCACCTGCGCCGGCG
LOC101510560	ERF	XP_004509259.1	350	364	-	23.0952	8.08e-09	3.46e-05	GGGTCGCCGCCGCCA
LOC101510560	ERF	XP_004502631.1	120	134	-	23	8.88e-09	3.46e-05	TCCGCGCCGCCGCCG
LOC101503531	ERF	XP_004491318.1	1362	1380	+	22.4444	1.75e-08	3.46e-05	CCAGAGCGGCGGCGGCCGT
LOC101504527	ERF	XP_004485405.1	59	79	+	22.3492	1.52e-08	3.47e-05	ATGCGGCGTATGCGGCGCTGC
LOC101504527	ERF	XP_004516664.1	1385	1405	+	22.3333	1.53e-08	3.47e-05	CGGGCGTGatgGCGGTGGATC
LOC101500468	ERF	NP_001266141.1	392	406	-	23.3492	1.09e-08	3.48e-05	GCGGCGCCGCCGCGC
LOC101497871	ERF	XP_004510156.1	173	193	-	21.4179	2.36e-08	3.48e-05	GCAGCGCCACCACCACCTGGC
LOC101497871	ERF	XP_004510052.1	479	499	-	21.3881	2.4e-08	3.48e-05	CCACCACCGCCACATCGCCAA
LOC101497710	ERF	XP_004504352.1	181	201	+	22.5238	1.45e-08	3.5e-05	CTGACCAGCCCGCCGCCGCTG
LOC101497710	ERF	NP_001266141.1	392	412	-	22.4762	1.5e-08	3.5e-05	TCAGCTGCGGCGCCGCCGCGC
LOC101491985	ERF	XP_004502631.1	120	134	-	24.6984	2.64e-09	3.52e-05	TCCGCGCCGCCGCCG
LOC101491985	ERF	XP_004498868.1	219	233	-	24.6508	2.74e-09	3.52e-05	CGGCCGCCGCCGCTA
LOC101496212	ERF	XP_004489174.1	772	799	-	21.5238	3.69e-08	3.54e-05	ATTTTTTCGCCGCCATATACACCACGCC
LOC101492500	ERF	XP_012573264.1	917	931	+	23.127	1.4e-08	3.55e-05	ATGGCGGCGGCGCGC
LOC101493667	ERF	XP_004504712.1	743	757	-	23.2381	1.2e-08	3.58e-05	TCATCGCCGCCGCAA
LOC101495239	ERF	XP_004509259.1	445	465	-	20.6567	2.05e-08	3.58e-05	CACGCCGCCGCTGCTGCCCAC
LOC101512899	ERF	XP_004498868.1	1532	1552	+	22.1429	2.34e-08	3.59e-05	TGCTGAGCGCGGCGGCGCAGT
LOC101504527	ERF	XP_004491518.1	512	532	+	22.1587	1.71e-08	3.6e-05	tgCCGCCGTATGCGGTGGTGG
LOC101504527	ERF	XP_004510052.1	1018	1038	-	22.0952	1.78e-08	3.6e-05	CGGCGCCAGTTTCGGCGGATC
LOC101504527	ERF	XP_004515076.1	273	293	+	22.0317	1.85e-08	3.6e-05	GGCGTGCGGCAAAGGCGGCGA
LOC101504527	ERF	XP_004506058.1	701	721	+	22.0317	1.85e-08	3.6e-05	GCGGCCAGGCGGCGGCGGATA
LOC101491273	ERF	XP_004506058.1	706	722	+	22.3492	1.94e-08	3.6e-05	CAGGCGGCGGCGGATAA
LOC101491273	ERF	NP_001265927.1	556	572	+	22.2857	2.01e-08	3.6e-05	GCGGCGGCGACCCTGCT
LOC101500468	ERF	XP_004504712.1	743	757	-	23.2381	1.2e-08	3.62e-05	TCATCGCCGCCGCAA
LOC101491273	ERF	NP_001351681.1	589	605	+	22.1905	2.13e-08	3.65e-05	GTGGTGGCGCCGCCGGA
LOC101500525	ERF	XP_004509259.1	347	361	-	22.2698	2.17e-08	3.65e-05	TCGCCGCCGCCACAA
LOC101491273	ERF	XP_004502631.1	116	132	+	22.1429	2.2e-08	3.65e-05	ATTGCGGCGGCGGCGCG
LOC101495239	ERF	NP_001266141.1	393	413	-	20.4776	2.25e-08	3.65e-05	TTCAGCTGCGGCGCCGCCGCG
LOC101495239	ERF	NP_001266141.1	492	512	-	20.3731	2.38e-08	3.65e-05	ATTTCCGGCGCCGCCGCGCCC
LOC101495239	ERF	NP_001265927.1	654	674	-	20.3731	2.38e-08	3.65e-05	ATTTCCGGCGCCGCCGCGCCC
LOC101495239	ERF	XP_004502631.1	118	138	-	20.3433	2.42e-08	3.65e-05	CGCATCCGCGCCGCCGCCGCA
LOC101497871	ERF	XP_004491518.1	515	535	-	21.2537	2.6e-08	3.65e-05	CATCCACCACCGCATACGGCG
LOC101503531	ERF	XP_004485405.1	1412	1430	+	22.3016	1.93e-08	3.67e-05	CGCGTCTGGCGGTGGTGGA
LOC101504527	ERF	XP_004512683.1	20	40	+	21.9206	1.99e-08	3.71e-05	AAGAACTGGCGCCGGCGGCGa
LOC101504527	ERF	XP_004510052.1	479	499	+	21.873	2.05e-08	3.71e-05	TTGGCGATGTGGCGGTGGTGG
LOC101510560	ERF	XP_004491318.1	1371	1385	-	22.8254	1.05e-08	3.73e-05	TCGCCACGGCCGCCG
LOC101503531	ERF	XP_004516664.1	1385	1403	+	22.2063	2.06e-08	3.76e-05	CGGGCGTGatgGCGGTGGA
LOC101506937	ERF	XP_004489174.1	138	158	+	21.0635	4.07e-08	3.76e-05	GATTCCGCCGCCGCCGTGCGT
LOC101506937	ERF	XP_004491318.1	646	666	-	21.0317	4.15e-08	3.76e-05	CCAGCCGCCATCGCTGCCCTG
LOC101506937	ERF	XP_004491318.1	1653	1673	+	20.9841	4.27e-08	3.79e-05	CCTGGCGCCGCAGCATCCGAA
LOC101497871	ERF	XP_004504712.1	788	808	-	21.0896	2.86e-08	3.82e-05	ACGGCGCCGCCACGTTCATGG
LOC101497871	ERF	XP_004491318.1	1365	1385	-	21.0746	2.88e-08	3.82e-05	TCGCCACGGCCGCCGCCGCTC
LOC101494217	ERF	XP_004516997.1	2590	2604	+	22.619	1.53e-08	3.83e-05	AAACCGCCGCCGCTG
LOC101495239	ERF	NP_001351681.1	285	305	-	20.0448	2.84e-08	3.83e-05	GGCAGCGCCAGCGCGGTCGCC
LOC101495239	ERF	XP_004510156.1	333	353	+	20.0299	2.86e-08	3.83e-05	TGCGGCGCCGGCGCAGGTGCC
LOC101495239	ERF	XP_012573264.1	907	927	-	20.0299	2.86e-08	3.83e-05	GCCGCCGCCATCGCTGCTAAT
LOC101495239	ERF	XP_004492936.1	18	38	-	19.9851	2.93e-08	3.83e-05	GTCGCCTGCACCGCCGCGGTG
LOC101495239	ERF	XP_004491318.1	649	669	-	19.9552	2.98e-08	3.83e-05	GCTCCAGCCGCCATCGCTGCC
LOC101500525	ERF	XP_004515598.1	27	41	-	22.127	2.39e-08	3.88e-05	GCGCCACGGCCGCCG
LOC101506937	ERF	XP_004492936.1	162	182	-	20.8571	4.62e-08	3.94e-05	CGCAGCGCCGCCCAACGCGCA
LOC101506937	ERF	NP_001266141.1	498	518	+	20.8095	4.76e-08	3.94e-05	GGCGGCGCCGGAAATTCCGCA
LOC101506937	ERF	NP_001265927.1	660	680	+	20.8095	4.76e-08	3.94e-05	GGCGGCGCCGGAAATTCCGCA
LOC101506937	ERF	XP_004510052.1	1132	1152	-	20.7937	4.8e-08	3.94e-05	CACCGCGCCGCTGCAGCTGCA
LOC101493699	ERF	XP_012570542.1	213	232	-	22.4921	1.4e-08	3.96e-05	CCACGCCGCAGCCGCAGCCC
LOC101493699	ERF	XP_004504712.1	723	742	-	22.4444	1.45e-08	3.96e-05	AGCTGCCGGTGCCGCCGCCC
LOC101493699	ERF	XP_012570542.1	32	51	-	22.3492	1.55e-08	3.96e-05	CGCGGTATCCGCCACCGGCA
LOC101493699	ERF	XP_004512683.1	32	51	-	22.3492	1.55e-08	3.96e-05	CAGTTTCACCATCGCCGCCG
LOC101494217	ERF	XP_004509259.1	347	361	-	22.4762	1.68e-08	4.02e-05	TCGCCGCCGCCACAA
LOC101504527	ERF	XP_004498868.1	210	230	+	21.6667	2.33e-08	4.08e-05	CGATTATTTTAGCGGCGGCGG
LOC101500525	ERF	XP_004510052.1	488	502	-	21.9841	2.62e-08	4.1e-05	TCGCCACCACCGCCA
LOC101494217	ERF	XP_004504712.1	743	757	-	22.3651	1.81e-08	4.15e-05	TCATCGCCGCCGCAA
LOC101494217	ERF	XP_004510156.1	332	346	-	22.3175	1.88e-08	4.15e-05	GCGCCGGCGCCGCAA
LOC101512899	ERF	XP_004510052.1	831	851	+	21.873	2.8e-08	4.15e-05	CGCGGTGTGCGGCGGCGCGCT
LOC101500525	ERF	XP_012573264.1	918	932	-	21.8889	2.8e-08	4.18e-05	AGCGCGCCGCCGCCA
LOC101500525	ERF	XP_004509259.1	453	467	-	21.8095	2.96e-08	4.18e-05	ACCACGCCGCCGCTG
LOC101500525	ERF	XP_004491318.1	1055	1069	-	21.8095	2.96e-08	4.18e-05	CCAGTTCCGCCGCCA
LOC101512899	ERF	XP_004506058.1	213	233	+	21.7937	2.95e-08	4.24e-05	GGGCGCGGGCTGCGGCGTGAG
LOC101500525	ERF	XP_004515598.1	24	38	-	21.7302	3.12e-08	4.27e-05	CCACGGCCGCCGCTC
LOC101493699	ERF	XP_004510156.1	338	357	-	22.127	1.82e-08	4.34e-05	ATCCGGCACCTGCGCCGGCG
LOC101493699	ERF	XP_004509259.1	350	369	-	22.0794	1.88e-08	4.34e-05	GCCCAGGGTCGCCGCCGCCA
LOC101492500	ERF	XP_004493600.1	632	646	+	22.7619	1.8e-08	4.35e-05	ACACCGGCGGCGCGG
LOC101492500	ERF	XP_004498868.1	937	951	+	22.6825	1.89e-08	4.36e-05	GGCGTGGCGGCGGAT
LOC101493699	ERF	XP_004506058.1	707	726	-	22	1.99e-08	4.39e-05	CACTTTATCCGCCGCCGCCT
LOC101495239	ERF	XP_004498868.1	1159	1179	-	19.6269	3.55e-08	4.43e-05	GCAAATGCCGCCGCTGCCGCA
LOC101496212	ERF	XP_012570542.1	203	230	-	21.0952	4.75e-08	4.44e-05	ACGCCGCAGCCGCAGCCCAGTTCCACCG
LOC101506937	ERF	NP_001266141.1	387	407	-	20.5556	5.55e-08	4.47e-05	TGCGGCGCCGCCGCGCTTTTT
LOC101503531	ERF	XP_004506058.1	704	722	+	21.8889	2.57e-08	4.49e-05	GCCAGGCGGCGGCGGATAA
LOC101503531	ERF	XP_004498868.1	1158	1176	+	21.8095	2.71e-08	4.49e-05	CTGCGGCAGCGGCGGCATT
LOC101503531	ERF	XP_004512683.1	23	41	+	21.746	2.83e-08	4.49e-05	AACTGGCGCCGGCGGCGat
LOC101503531	ERF	XP_004491318.1	648	666	+	21.7302	2.86e-08	4.49e-05	GGGCAGCGATGGCGGCTGG
LOC101500525	ERF	XP_004485405.1	941	955	-	21.619	3.38e-08	4.49e-05	CCACCAGCGCCGCAA
LOC101512899	ERF	XP_004504712.1	717	737	+	21.6349	3.27e-08	4.53e-05	GGATGTGGGCGGCGGCACCGG
LOC101512899	ERF	XP_004504352.1	190	210	-	21.6032	3.34e-08	4.53e-05	CAGAATATGCAGCGGCGGCGG
LOC101491273	ERF	XP_004498868.1	1157	1173	+	21.7143	2.85e-08	4.56e-05	GCTGCGGCAGCGGCGGC
LOC101506937	ERF	XP_004509259.1	442	462	-	20.4762	5.83e-08	4.56e-05	GCCGCCGCTGCTGCCCACCAC
LOC101506937	ERF	XP_004504712.1	715	735	-	20.4444	5.94e-08	4.56e-05	GGTGCCGCCGCCCACATCCAG
LOC101506937	ERF	XP_004489801.1	199	219	-	20.4286	6e-08	4.56e-05	ATCGCCGCTGCCGCAGCACAC
LOC101499805	ERF	XP_004516997.1	698	712	+	23.8571	3.61e-09	4.58e-05	GCGATAACGGCGGCG
LOC101499805	ERF	XP_012573264.1	43	57	+	23.7619	4.05e-09	4.58e-05	AGCATTGCGGCGGCG
LOC101499805	ERF	XP_004509259.1	346	360	+	23.7143	4.35e-09	4.58e-05	ATTGTGGCGGCGGCG
LOC101499805	ERF	XP_004489174.1	143	157	-	23.6825	4.55e-09	4.58e-05	CGCACGGCGGCGGCG
LOC101494217	ERF	NP_001266141.1	392	406	-	22.127	2.15e-08	4.58e-05	GCGGCGCCGCCGCGC
LOC101500525	ERF	XP_004491318.1	1371	1385	-	21.5238	3.6e-08	4.59e-05	TCGCCACGGCCGCCG
LOC101500525	ERF	XP_004509259.1	494	508	-	21.4921	3.67e-08	4.59e-05	CCACATCCGCCGCAT
LOC101506937	ERF	XP_004510156.1	336	356	-	20.381	6.17e-08	4.61e-05	TCCGGCACCTGCGCCGGCGCC
LOC101497710	ERF	XP_004491318.1	1055	1075	-	22	2.1e-08	4.69e-05	TCAGGCCCAGTTCCGCCGCCA
LOC101512899	ERF	XP_004485405.1	1044	1064	+	21.5079	3.55e-08	4.69e-05	TGGCCGTAGCGGCGGCAGCAT
LOC101497871	ERF	XP_004516997.1	2593	2613	+	20.6716	3.63e-08	4.69e-05	CCGCCGCCGCTGTATCTGTGG
LOC101496212	ERF	XP_004498868.1	1148	1175	-	20.9524	5.17e-08	4.69e-05	ATGCCGCCGCTGCCGCAGCCCAGTTCCA
LOC101504527	ERF	XP_004489174.1	139	159	-	21.3492	2.83e-08	4.71e-05	CACGCACGGCGGCGGCGGAAT
LOC101504527	ERF	XP_004509259.1	447	467	+	21.3333	2.86e-08	4.71e-05	GGGCAGCAGCGGCGGCGTGGT
LOC101506937	ERF	XP_004515076.1	274	294	-	20.3175	6.41e-08	4.71e-05	ATCGCCGCCTTTGCCGCACGC
LOC101497871	ERF	XP_004492936.1	14	34	-	20.6119	3.76e-08	4.72e-05	CCTGCACCGCCGCGGTGTTGC
LOC101506937	ERF	XP_004509259.1	339	359	-	20.2857	6.53e-08	4.72e-05	GCCGCCGCCACAATGCCCACA
LOC101496212	ERF	XP_004504712.1	784	811	-	20.8889	5.36e-08	4.74e-05	TATACGGCGCCGCCACGTTCATGGTGGT
LOC101497871	ERF	XP_004491318.1	645	665	-	20.5522	3.89e-08	4.76e-05	CAGCCGCCATCGCTGCCCTGC
LOC101497710	ERF	XP_004485405.1	2637	2657	-	21.8889	2.27e-08	4.86e-05	TCCCAGCCGCCCCAGCCGTTG
LOC101493699	ERF	XP_004510156.1	176	195	-	21.7937	2.3e-08	4.86e-05	CTGCAGCGCCACCACCACCT
LOC101493699	ERF	XP_004515598.1	24	43	-	21.7302	2.41e-08	4.87e-05	CCGCGCCACGGCCGCCGCTC
LOC101497710	ERF	XP_004512683.1	392	412	-	21.8254	2.37e-08	4.88e-05	CGCCGCCCAGCAGCGCCGCAA
LOC101496212	ERF	XP_004512086.1	812	839	-	20.7778	5.71e-08	4.92e-05	TCTTCAAAGCCGCCTTCACGCAGCACGC
LOC101504527	ERF	XP_004502631.1	108	128	+	21.2063	3.09e-08	4.94e-05	CGAACTGTATTGCGGCGGCGG
LOC101507986	ERF	XP_004498868.1	1200	1220	+	22.6866	1.23e-08	4.96e-05	TGCGGATCTGGTGGTGGCGAC
LOC101500525	ERF	NP_001351681.1	590	604	-	21.3175	4.12e-08	5.01e-05	CCGGCGGCGCCACCA
LOC101506937	ERF	XP_004509259.1	198	218	-	20.1587	7.05e-08	5.01e-05	GTCGCCGCCGGCCACAGCTGA
LOC101500525	ERF	XP_004498868.1	1538	1552	-	21.254	4.27e-08	5.02e-05	ACTGCGCCGCCGCGC
LOC101500525	ERF	NP_001265927.1	554	568	-	21.2222	4.36e-08	5.02e-05	GGGTCGCCGCCGCGC
LOC101512899	ERF	XP_004489174.1	807	827	+	21.3492	3.94e-08	5.05e-05	TGGCGTGGGCGGCGGCACCCG
LOC101491273	ERF	NP_001351681.1	588	604	-	21.4762	3.28e-08	5.09e-05	CCGGCGGCGCCACCACG
LOC101499805	ERF	XP_004504712.1	793	807	+	23.2063	7.65e-09	5.1e-05	AACGTGGCGGCGCCG
LOC101499805	ERF	NP_001266141.1	493	507	+	23.127	8.3e-09	5.1e-05	GGCGCGGCGGCGCCG
LOC101499805	ERF	NP_001265927.1	655	669	+	23.127	8.3e-09	5.1e-05	GGCGCGGCGGCGCCG
LOC101499805	ERF	XP_004509259.1	449	463	+	23.0317	9.12e-09	5.1e-05	GCAGCAGCGGCGGCG
LOC101495239	ERF	XP_004502631.1	115	135	-	19.2985	4.21e-08	5.11e-05	ATCCGCGCCGCCGCCGCAATA
LOC101493667	ERF	XP_004504352.1	187	201	+	22.7143	1.8e-08	5.12e-05	AGCCCGCCGCCGCTG
LOC101495239	ERF	XP_004485405.1	60	80	-	19.194	4.45e-08	5.12e-05	CGCAGCGCCGCATACGCCGCA
LOC101495239	ERF	XP_012573264.1	729	749	-	19.194	4.45e-08	5.12e-05	TCTTCCGCCACATCCACCATT
LOC101497710	ERF	XP_004498868.1	219	239	-	21.6984	2.59e-08	5.13e-05	ACTTTACGGCCGCCGCCGCTA
LOC101497871	ERF	XP_004485405.1	1412	1432	-	20.3731	4.3e-08	5.13e-05	CATCCACCACCGCCAGACGCG
LOC101497710	ERF	XP_004515598.1	41	61	-	21.6349	2.71e-08	5.17e-05	CCACTTCTTTCGGCACCGCCG
LOC101500468	ERF	XP_004504352.1	187	201	+	22.7143	1.8e-08	5.18e-05	AGCCCGCCGCCGCTG
LOC101495993	ERF	XP_004510052.1	489	508	-	25.4921	1.18e-09	5.2e-05	CGCTGCTCGCCACCACCGCC
LOC101499450	ERF	NP_001266141.1	396	405	-	21.5595	7.3e-09	5.22e-05	CGGCGCCGCC
LOC101499450	ERF	NP_001266141.1	498	507	-	21.5595	7.3e-09	5.22e-05	CGGCGCCGCC
LOC101499450	ERF	NP_001265927.1	660	669	-	21.5595	7.3e-09	5.22e-05	CGGCGCCGCC
LOC101499450	ERF	XP_004504712.1	798	807	-	21.5595	7.3e-09	5.22e-05	CGGCGCCGCC
LOC101499450	ERF	XP_004502631.1	121	130	-	21.0238	1.61e-08	5.22e-05	CGCCGCCGCC
LOC101499450	ERF	XP_004489174.1	143	152	+	21.0238	1.61e-08	5.22e-05	CGCCGCCGCC
LOC101499450	ERF	XP_004509259.1	351	360	-	21.0238	1.61e-08	5.22e-05	CGCCGCCGCC
LOC101499450	ERF	XP_004506058.1	708	717	-	21.0238	1.61e-08	5.22e-05	CGCCGCCGCC
LOC101499450	ERF	XP_012573264.1	919	928	-	21.0238	1.61e-08	5.22e-05	CGCCGCCGCC
LOC101497710	ERF	XP_004512683.1	32	52	-	21.5714	2.83e-08	5.22e-05	CCAGTTTCACCATCGCCGCCG
LOC101497871	ERF	XP_004489174.1	136	156	+	20.2985	4.49e-08	5.22e-05	GCGATTCCGCCGCCGCCGTGC
LOC101506937	ERF	XP_004498868.1	930	950	-	20.0476	7.53e-08	5.23e-05	TCCGCCGCCACGCCTTCGCTC
LOC101506937	ERF	XP_004515598.1	30	50	-	20.0317	7.6e-08	5.23e-05	GGCACCGCCGCGCCACGGCCG
LOC101497710	ERF	XP_004510052.1	485	505	-	21.4603	3.05e-08	5.26e-05	TGCTCGCCACCACCGCCACAT
LOC101497710	ERF	XP_004498868.1	1158	1178	-	21.4603	3.05e-08	5.26e-05	CAAATGCCGCCGCTGCCGCAG
LOC101493667	ERF	NP_001266141.1	394	408	+	22.6032	1.96e-08	5.3e-05	GCGGCGGCGCCGCAG
LOC101493667	ERF	XP_004509259.1	453	467	-	22.5397	2.07e-08	5.33e-05	ACCACGCCGCCGCTG
LOC101497710	ERF	XP_004498868.1	941	961	-	21.3651	3.25e-08	5.33e-05	CGCCAAACATATCCGCCGCCA
LOC101497710	ERF	XP_004492936.1	23	43	-	21.3492	3.29e-08	5.33e-05	CGTTGGTCGCCTGCACCGCCG
LOC101500468	ERF	NP_001266141.1	394	408	+	22.6032	1.96e-08	5.36e-05	GCGGCGGCGCCGCAG
LOC101500468	ERF	XP_004509259.1	453	467	-	22.5397	2.07e-08	5.4e-05	ACCACGCCGCCGCTG
LOC101506937	ERF	XP_004504712.1	735	755	-	19.9365	8.05e-08	5.41e-05	ATCGCCGCCGCAAAGCTGCCG
LOC101506937	ERF	XP_004498868.1	933	953	-	19.9206	8.12e-08	5.41e-05	ATATCCGCCGCCACGCCTTCG
LOC101496212	ERF	XP_004491318.1	1042	1069	-	20.5556	6.48e-08	5.44e-05	CCAGTTCCGCCGCCAGTTTCTGAATATC
LOC101493667	ERF	XP_004492936.1	20	34	-	22.4444	2.21e-08	5.45e-05	CCTGCACCGCCGCGG
LOC101504527	ERF	XP_004485405.1	2637	2657	+	21	3.51e-08	5.45e-05	CAACGGCTGGGGCGGCTGGGA
LOC101504527	ERF	XP_004491518.1	545	565	+	20.9206	3.68e-08	5.46e-05	AGCTGGCGAAAGCGGCGCTGC
LOC101504527	ERF	XP_004510052.1	828	848	+	20.9048	3.72e-08	5.46e-05	GAACGCGGTGTGCGGCGGCGC
LOC101500525	ERF	XP_012570542.1	216	230	-	21.0159	4.99e-08	5.46e-05	ACGCCGCAGCCGCAG
LOC101500525	ERF	XP_004489174.1	813	827	-	21.0159	4.99e-08	5.46e-05	CGGGTGCCGCCGCCC
LOC101504527	ERF	XP_004489174.1	804	824	+	20.8571	3.83e-08	5.47e-05	TTTTGGCGTGGGCGGCGGCAC
LOC101495239	ERF	XP_004485405.1	1042	1062	-	19.0149	4.89e-08	5.47e-05	GCTGCCGCCGCTACGGCCATA
LOC101494217	ERF	XP_004491318.1	1055	1069	-	21.7937	2.68e-08	5.49e-05	CCAGTTCCGCCGCCA
LOC101512899	ERF	XP_004510052.1	479	499	+	21.1111	4.58e-08	5.5e-05	TTGGCGATGTGGCGGTGGTGG
LOC101512899	ERF	XP_004498868.1	932	952	+	21.0794	4.68e-08	5.5e-05	GCGAAGGCGTGGCGGCGGATa
LOC101512899	ERF	XP_004491318.1	1654	1674	-	21.0635	4.72e-08	5.5e-05	TTTCGGATGCTGCGGCGCCAG
LOC101497871	ERF	XP_004509259.1	488	508	-	20.1642	4.84e-08	5.5e-05	CCACATCCGCCGCATGGCCCC
LOC101512899	ERF	XP_012570542.1	207	227	+	21.0159	4.87e-08	5.5e-05	GGAACTGGGCTGCGGCTGCGG
LOC101512899	ERF	XP_004498868.1	213	233	+	21.0159	4.87e-08	5.5e-05	TTATTTTAGCGGCGGCGGCCG
LOC101500468	ERF	XP_004492936.1	20	34	-	22.4444	2.21e-08	5.52e-05	CCTGCACCGCCGCGG
LOC101493699	ERF	XP_004509259.1	447	466	-	21.4921	2.84e-08	5.52e-05	CCACGCCGCCGCTGCTGCCC
LOC101512420	ERF	XP_004509259.1	349	361	+	23.2222	3.62e-09	5.53e-05	GTGGCGGCGGCGA
LOC101512420	ERF	XP_004502631.1	119	131	+	22.7143	5.19e-09	5.53e-05	GCGGCGGCGGCGC
LOC101512420	ERF	XP_004489174.1	142	154	-	22.6667	5.45e-09	5.53e-05	ACGGCGGCGGCGG
LOC101512420	ERF	NP_001266141.1	496	508	+	22.1746	9.15e-09	5.53e-05	GCGGCGGCGCCGG
LOC101512420	ERF	NP_001265927.1	658	670	+	22.1746	9.15e-09	5.53e-05	GCGGCGGCGCCGG
LOC101512420	ERF	XP_004498868.1	221	233	+	22.1587	9.2e-09	5.53e-05	GCGGCGGCGGCCG
LOC101512420	ERF	XP_004491318.1	1367	1379	+	22.1587	9.2e-09	5.53e-05	GCGGCGGCGGCCG
LOC101512899	ERF	XP_004509259.1	344	364	+	20.9524	5.07e-08	5.6e-05	GCATTGTGGCGGCGGCGACCC
LOC101495239	ERF	XP_004512683.1	21	41	-	18.9104	5.16e-08	5.63e-05	ATCGCCGCCGGCGCCAGTTCT
LOC101497710	ERF	XP_004489801.1	702	722	-	21.2222	3.59e-08	5.64e-05	CAGCCCATCAGGCCGCCGCCA
LOC101491273	ERF	XP_004498868.1	940	956	+	21.2381	3.78e-08	5.67e-05	GTGGCGGCGGATatgTT
LOC101491273	ERF	NP_001266141.1	393	409	-	21.1587	3.96e-08	5.75e-05	GCTGCGGCGCCGCCGCG
LOC101500525	ERF	XP_004491318.1	947	961	-	20.8571	5.53e-08	5.76e-05	CGCCCGGCGCCGCGC
LOC101500525	ERF	XP_004491518.1	1037	1051	-	20.8571	5.53e-08	5.76e-05	CGCCCGGCGCCGCGC
LOC101496212	ERF	XP_004509259.1	196	223	-	20.3968	7.08e-08	5.76e-05	GGCTGGTCGCCGCCGGCCACAGCTGAAA
LOC101496212	ERF	XP_004498868.1	1151	1178	-	20.3651	7.2e-08	5.76e-05	CAAATGCCGCCGCTGCCGCAGCCCAGTT
LOC101496212	ERF	NP_001266141.1	382	409	-	20.2857	7.52e-08	5.88e-05	GCTGCGGCGCCGCCGCGCTTTTTTCAAT
LOC101495239	ERF	NP_001351681.1	594	614	-	18.7463	5.62e-08	5.89e-05	AGCGGCGCATCCGGCGGCGCC
LOC101495239	ERF	XP_004510052.1	480	500	-	18.7313	5.66e-08	5.89e-05	GCCACCACCGCCACATCGCCA
LOC101491985	ERF	XP_004485405.1	1418	1432	-	23.7778	5.73e-09	5.9e-05	CATCCACCACCGCCA
LOC101512899	ERF	XP_004485405.1	59	79	+	20.8254	5.49e-08	5.92e-05	ATGCGGCGTATGCGGCGCTGC
LOC101501427	ERF	NP_001266141.1	392	406	-	23.4921	1.12e-08	5.95e-05	GCGGCGCCGCCGCGC
LOC101506937	ERF	XP_004498868.1	1530	1550	-	19.7143	9.17e-08	5.98e-05	TGCGCCGCCGCGCTCAGCAGG
LOC101506937	ERF	XP_004485405.1	1410	1430	-	19.6984	9.26e-08	5.98e-05	TCCACCACCGCCAGACGCGGG
LOC101506937	ERF	XP_004506058.1	214	234	-	19.6667	9.43e-08	6e-05	GCTCACGCCGCAGCCCGCGCC
LOC101503531	ERF	NP_001266141.1	488	506	+	21.1905	4.09e-08	6.01e-05	ATGTGGGCGCGGCGGCGCC
LOC101503531	ERF	NP_001265927.1	650	668	+	21.1905	4.09e-08	6.01e-05	ATGTGGGCGCGGCGGCGCC
LOC101503531	ERF	XP_004504352.1	189	207	-	21.1111	4.31e-08	6.06e-05	AATATGCAGCGGCGGCGGG
LOC101503531	ERF	NP_001351681.1	416	434	+	21.0635	4.44e-08	6.06e-05	CGGCGCTGCCGGTGCTGGA
LOC101503531	ERF	NP_001351681.1	587	605	+	20.9524	4.78e-08	6.06e-05	GCGTGGTGGCGCCGCCGGA
LOC101503531	ERF	XP_004510029.1	731	749	+	20.9524	4.78e-08	6.06e-05	TGGCGATTGCGGCGCTGAA
LOC101503531	ERF	XP_004489174.1	138	156	-	20.9206	4.87e-08	6.06e-05	GCACGGCGGCGGCGGAATC
LOC101503531	ERF	XP_004510052.1	485	503	+	20.9048	4.92e-08	6.06e-05	ATGTGGCGGTGGTGGCGAG
LOC101491273	ERF	XP_004504712.1	745	761	+	21.0159	4.31e-08	6.07e-05	GCGGCGGCGatgAAACT
LOC101506937	ERF	XP_004504712.1	789	809	-	19.619	9.7e-08	6.08e-05	TACGGCGCCGCCACGTTCATG
LOC101501427	ERF	XP_004506058.1	707	721	-	23.3333	1.28e-08	6.17e-05	TATCCGCCGCCGCCT
LOC101493667	ERF	XP_012573264.1	915	929	-	22.1905	2.65e-08	6.27e-05	GCGCCGCCGCCATCG
LOC101496212	ERF	XP_004506058.1	209	236	-	20.127	8.2e-08	6.27e-05	CCGCTCACGCCGCAGCCCGCGCCCAGTT
LOC101499805	ERF	XP_004502631.1	113	127	+	22.7302	1.25e-08	6.28e-05	TGTATTGCGGCGGCG
LOC101496212	ERF	XP_004485405.1	2633	2660	-	20.0794	8.42e-08	6.29e-05	AGATCCCAGCCGCCCCAGCCGTTGCAAT
LOC101493667	ERF	XP_004485405.1	941	955	-	22.1111	2.78e-08	6.3e-05	CCACCAGCGCCGCAA
LOC101504527	ERF	XP_004498868.1	246	266	+	20.5556	4.59e-08	6.3e-05	GGAAGCGGGCTGCGGCGCGGG
LOC101504527	ERF	XP_004510052.1	801	821	+	20.5397	4.64e-08	6.3e-05	GTGCTGCTATAGCGGCGGCTT
LOC101493699	ERF	XP_012573264.1	912	931	-	21.2381	3.39e-08	6.34e-05	GCGCGCCGCCGCCATCGCTG
LOC101500468	ERF	XP_012573264.1	915	929	-	22.1905	2.65e-08	6.35e-05	GCGCCGCCGCCATCG
LOC101506937	ERF	XP_012573264.1	913	933	-	19.5079	1.03e-07	6.36e-05	CAGCGCGCCGCCGCCATCGCT
LOC101506937	ERF	XP_004516997.1	694	714	-	19.4921	1.04e-07	6.36e-05	TTCGCCGCCGTTATCGCAAAT
LOC101500468	ERF	XP_004485405.1	941	955	-	22.1111	2.78e-08	6.37e-05	CCACCAGCGCCGCAA
LOC101506937	ERF	XP_004510052.1	1017	1037	+	19.4603	1.06e-07	6.39e-05	TGATCCGCCGAAACTGGCGCC
LOC101501427	ERF	XP_004502631.1	114	128	-	23.1587	1.45e-08	6.42e-05	CCGCCGCCGCAATAC
LOC101504527	ERF	XP_004502631.1	111	131	+	20.4444	4.91e-08	6.44e-05	ACTGTATTGCGGCGGCGGCGC
LOC101504527	ERF	XP_004502631.1	114	134	+	20.4127	5.01e-08	6.44e-05	GTATTGCGGCGGCGGCGCGGA
LOC101504527	ERF	XP_004491318.1	1356	1376	+	20.381	5.1e-08	6.44e-05	CCGTAACCAGAGCGGCGGCGG
LOC101506937	ERF	XP_004516997.1	697	717	-	19.4127	1.09e-07	6.47e-05	CACTTCGCCGCCGTTATCGCA
LOC101489276	ERF	XP_004510052.1	489	499	-	24.3492	7.63e-09	6.54e-05	CCACCACCGCC
LOC101489276	ERF	XP_004485405.1	1419	1429	-	24.3492	7.63e-09	6.54e-05	CCACCACCGCC
LOC101489276	ERF	XP_004502631.1	121	131	-	23.6349	8.84e-09	6.54e-05	GCGCCGCCGCC
LOC101489276	ERF	XP_012573264.1	919	929	-	23.6349	8.84e-09	6.54e-05	GCGCCGCCGCC
LOC101489276	ERF	XP_004498868.1	220	230	-	23.5714	1.2e-08	6.54e-05	CCGCCGCCGCT
LOC101489276	ERF	XP_004491318.1	1366	1376	-	23.5714	1.2e-08	6.54e-05	CCGCCGCCGCT
LOC101489276	ERF	XP_004504352.1	190	200	+	23.5714	1.2e-08	6.54e-05	CCGCCGCCGCT
LOC101489276	ERF	XP_004516997.1	2593	2603	+	23.5714	1.2e-08	6.54e-05	CCGCCGCCGCT
LOC101497710	ERF	XP_004512683.1	366	386	-	20.9524	4.3e-08	6.58e-05	CCCACCAGGCCGCAGCCGCTG
LOC101504527	ERF	XP_004510156.1	329	349	+	20.2698	5.45e-08	6.62e-05	GCTTTGCGGCGCCGGCGCAGG
LOC101504527	ERF	XP_004498868.1	1532	1552	+	20.2381	5.55e-08	6.62e-05	TGCTGAGCGCGGCGGCGCAGT
LOC101504527	ERF	XP_004491318.1	645	665	+	20.2222	5.61e-08	6.62e-05	GCAGGGCAGCGATGGCGGCTG
LOC101500525	ERF	XP_004515598.1	38	52	-	20.6032	6.51e-08	6.63e-05	TCGGCACCGCCGCGC
LOC101495239	ERF	XP_004510029.1	753	773	-	18.4328	6.6e-08	6.71e-05	CCCACCGCAAACGCCGCGCCA
LOC101497871	ERF	XP_012570542.1	207	227	-	19.7612	6.06e-08	6.73e-05	CCGCAGCCGCAGCCCAGTTCC
LOC101491273	ERF	XP_004504712.1	796	812	+	20.7778	4.95e-08	6.76e-05	GTGGCGGCGCCGTATAG
LOC101495239	ERF	XP_004491318.1	1369	1389	-	18.3582	6.86e-08	6.81e-05	AATATCGCCACGGCCGCCGCC
LOC101506937	ERF	XP_004510052.1	483	503	-	19.3016	1.17e-07	6.81e-05	CTCGCCACCACCGCCACATCG
LOC101500525	ERF	XP_004498868.1	222	236	-	20.5238	6.85e-08	6.82e-05	TTACGGCCGCCGCCG
LOC101506937	ERF	XP_004510052.1	186	206	+	19.2698	1.19e-07	6.84e-05	CCGTCCGCCGCCGAAAACCGG
LOC101510560	ERF	XP_004489174.1	813	827	-	22.0635	2.12e-08	6.86e-05	CGGGTGCCGCCGCCC
LOC101506937	ERF	XP_004516664.1	1386	1406	-	19.2381	1.21e-07	6.87e-05	CGATCCACCGCCATCACGCCC
LOC101503531	ERF	XP_004510156.1	176	194	+	20.6667	5.74e-08	6.88e-05	AGGTGGTGGTGGCGCTGCA
LOC101497871	ERF	XP_004506058.1	698	718	-	19.6716	6.36e-08	6.91e-05	CCGCCGCCGCCTGGCCGCTGT
LOC101506937	ERF	NP_001351681.1	582	602	-	19.2063	1.23e-07	6.91e-05	GGCGGCGCCACCACGCTGCCG
LOC101504527	ERF	XP_004509259.1	338	358	+	20.1111	5.99e-08	6.92e-05	TTGTGGGCATTGTGGCGGCGG
LOC101495239	ERF	XP_004509259.1	342	362	-	18.2836	7.13e-08	6.92e-05	GTCGCCGCCGCCACAATGCCC
LOC101506937	ERF	XP_004515598.1	16	36	-	19.1746	1.25e-07	6.92e-05	ACGGCCGCCGCTCGCCGCGTT
LOC101506937	ERF	XP_004510029.1	676	696	-	19.1587	1.27e-07	6.92e-05	TTCGCCGCCTTTAATGCAGCC
LOC101495239	ERF	NP_001265927.1	601	621	-	18.2388	7.3e-08	6.93e-05	CCAGCCTTCACGGCCATCGCC
LOC101493699	ERF	XP_004491318.1	654	673	-	20.9206	4.23e-08	6.99e-05	CCGCGCTCCAGCCGCCATCG
LOC101493699	ERF	XP_004504712.1	726	745	-	20.9206	4.23e-08	6.99e-05	CAAAGCTGCCGGTGCCGCCG
LOC101493699	ERF	XP_004510156.1	380	399	-	20.8889	4.32e-08	6.99e-05	CACCATCAGCGGCAGCGCCG
LOC101493699	ERF	XP_012573264.1	1251	1270	-	20.873	4.37e-08	6.99e-05	CGCTATCATCGCCGCCTTCG
LOC101493699	ERF	XP_012570542.1	35	54	-	20.8413	4.46e-08	6.99e-05	CAGCGCGGTATCCGCCACCG
LOC101506937	ERF	XP_004516997.1	2589	2609	+	19.0794	1.33e-07	7.01e-05	GAAACCGCCGCCGCTGTATCT
LOC101506937	ERF	XP_004491318.1	649	669	-	19.0635	1.34e-07	7.01e-05	GCTCCAGCCGCCATCGCTGCC
LOC101506937	ERF	XP_004498868.1	1200	1220	-	19.0635	1.34e-07	7.01e-05	GTCGCCACCACCAGATCCGCA
LOC101506937	ERF	XP_004504352.1	1968	1988	-	19.0476	1.35e-07	7.01e-05	TCCGGCGCCGGGCACGCCAGG
LOC101504527	ERF	XP_004491318.1	1654	1674	-	20.0159	6.34e-08	7.02e-05	TTTCGGATGCTGCGGCGCCAG
LOC101504527	ERF	XP_004506058.1	698	718	+	19.9841	6.46e-08	7.02e-05	ACAGCGGCCAGGCGGCGGCGG
LOC101504527	ERF	XP_004510052.1	1131	1151	+	19.9841	6.46e-08	7.02e-05	CTGCAGCTGCAGCGGCGCGGT
LOC101500525	ERF	XP_004489174.1	136	150	+	20.4286	7.25e-08	7.05e-05	GCGATTCCGCCGCCG
LOC101510560	ERF	XP_004491318.1	1365	1379	-	21.9365	2.36e-08	7.06e-05	CGGCCGCCGCCGCTC
LOC101504527	ERF	NP_001351681.1	590	610	+	19.9365	6.64e-08	7.07e-05	TGGTGGCGCCGCCGGATGCGC
LOC101495239	ERF	XP_004485405.1	2635	2655	-	18.1194	7.76e-08	7.11e-05	CCAGCCGCCCCAGCCGTTGCA
LOC101495239	ERF	XP_004510156.1	406	426	-	18.1045	7.81e-08	7.11e-05	AAAACGGCCGCTGCCGCAGCC
LOC101496212	ERF	XP_004489174.1	80	107	-	19.8095	9.73e-08	7.11e-05	ATGCCAAAGCCGCTGCCCACGCTGCTGC
LOC101493699	ERF	XP_004492936.1	23	42	-	20.7619	4.71e-08	7.14e-05	GTTGGTCGCCTGCACCGCCG
LOC101499805	ERF	XP_004516997.1	2594	2608	-	22.4127	1.68e-08	7.17e-05	GATACAGCGGCGGCG
LOC101499805	ERF	XP_004510029.1	733	747	+	22.3968	1.71e-08	7.17e-05	GCGATTGCGGCGCTG
LOC101495239	ERF	XP_004510156.1	180	200	-	18	8.24e-08	7.2e-05	TGATCCTGCAGCGCCACCACC
LOC101495239	ERF	XP_004498868.1	1200	1220	-	18	8.24e-08	7.2e-05	GTCGCCACCACCAGATCCGCA
LOC101501427	ERF	XP_004489174.1	139	153	+	22.8571	1.76e-08	7.23e-05	ATTCCGCCGCCGCCG
LOC101500525	ERF	XP_004492936.1	23	37	-	20.3492	7.61e-08	7.24e-05	TCGCCTGCACCGCCG
LOC101503531	ERF	XP_004489801.1	560	578	+	20.5397	6.22e-08	7.26e-05	TTGTGGTGCCGGTGGCGAG
LOC101497871	ERF	XP_004515598.1	32	52	-	19.5373	6.85e-08	7.27e-05	TCGGCACCGCCGCGCCACGGC
LOC101495239	ERF	XP_004502631.1	121	141	-	17.9403	8.5e-08	7.28e-05	ATCCGCATCCGCGCCGCCGCC
LOC101495239	ERF	XP_004485405.1	57	77	-	17.8507	8.89e-08	7.33e-05	AGCGCCGCATACGCCGCATCG
LOC101495239	ERF	NP_001351681.1	288	308	-	17.8507	8.89e-08	7.33e-05	TCCGGCAGCGCCAGCGCGGTC
LOC101504527	ERF	NP_001266141.1	499	519	-	19.7778	7.29e-08	7.34e-05	CTGCGGAATTTCCGGCGCCGC
LOC101504527	ERF	NP_001265927.1	661	681	-	19.7778	7.29e-08	7.34e-05	CTGCGGAATTTCCGGCGCCGC
LOC101504527	ERF	XP_004510052.1	482	502	+	19.7302	7.5e-08	7.34e-05	GCGATGTGGCGGTGGTGGCGA
LOC101504527	ERF	XP_004516997.1	2590	2610	-	19.7302	7.5e-08	7.34e-05	CAGATACAGCGGCGGCGGTTT
LOC101504527	ERF	XP_004504712.1	788	808	+	19.7143	7.57e-08	7.34e-05	CCatgAACGTGGCGGCGCCGT
LOC101493699	ERF	XP_004485405.1	1044	1063	-	20.6667	5.03e-08	7.39e-05	TGCTGCCGCCGCTACGGCCA
LOC101494217	ERF	NP_001266141.1	394	408	+	21.2857	3.74e-08	7.41e-05	GCGGCGGCGCCGCAG
LOC101492500	ERF	XP_004506058.1	703	717	+	21.7937	3.38e-08	7.46e-05	GGCCAGGCGGCGGCG
LOC101489276	ERF	XP_004509259.1	351	361	-	23.4603	1.53e-08	7.53e-05	TCGCCGCCGCC
LOC101504527	ERF	XP_004510029.1	675	695	+	19.5873	8.15e-08	7.53e-05	TGGCTGCATTAAAGGCGGCGA
LOC101504527	ERF	XP_004516997.1	693	713	+	19.5873	8.15e-08	7.53e-05	GATTTGCGATAACGGCGGCGA
LOC101504527	ERF	XP_004510029.1	728	748	+	19.5397	8.38e-08	7.53e-05	TTCTGGCGATTGCGGCGCTGA
LOC101504527	ERF	XP_012573264.1	906	926	+	19.5397	8.38e-08	7.53e-05	TATTAGCAGCGATGGCGGCGG
LOC101504527	ERF	XP_012570542.1	207	227	+	19.5238	8.46e-08	7.53e-05	GGAACTGGGCTGCGGCTGCGG
LOC101491985	ERF	XP_004504712.1	723	737	-	22.7937	1.32e-08	7.58e-05	CCGGTGCCGCCGCCC
LOC101491985	ERF	XP_004502631.1	117	131	-	22.6984	1.43e-08	7.58e-05	GCGCCGCCGCCGCAA
LOC101491985	ERF	XP_004491318.1	1055	1069	-	22.6667	1.47e-08	7.58e-05	CCAGTTCCGCCGCCA
LOC101491985	ERF	XP_004489174.1	139	153	+	22.6032	1.54e-08	7.58e-05	ATTCCGCCGCCGCCG
LOC101491985	ERF	XP_004506058.1	707	721	-	22.5714	1.57e-08	7.58e-05	TATCCGCCGCCGCCT
LOC101491985	ERF	XP_004491318.1	1365	1379	-	22.5397	1.62e-08	7.58e-05	CGGCCGCCGCCGCTC
LOC101495239	ERF	XP_004510156.1	330	350	-	17.7463	9.38e-08	7.59e-05	ACCTGCGCCGGCGCCGCAAAG
LOC101512899	ERF	XP_004515076.1	276	296	+	20.381	7.22e-08	7.6e-05	GTGCGGCAAAGGCGGCGATCT
LOC101512899	ERF	XP_004510029.1	728	748	+	20.3492	7.36e-08	7.6e-05	TTCTGGCGATTGCGGCGCTGA
LOC101504527	ERF	XP_004504712.1	717	737	+	19.4762	8.69e-08	7.62e-05	GGATGTGGGCGGCGGCACCGG
LOC101495239	ERF	XP_004491318.1	646	666	-	17.7015	9.59e-08	7.62e-05	CCAGCCGCCATCGCTGCCCTG
LOC101496212	ERF	XP_004485405.1	1037	1064	-	19.6349	1.07e-07	7.62e-05	ATGCTGCCGCCGCTACGGCCATACGCCC
LOC101491273	ERF	XP_004491318.1	656	672	+	20.4444	5.98e-08	7.64e-05	ATGGCGGCTGGAGCGCG
LOC101491273	ERF	XP_004510052.1	183	199	-	20.4127	6.09e-08	7.64e-05	TCGGCGGCGGACGGCCA
LOC101491273	ERF	XP_012570542.1	215	231	+	20.4127	6.09e-08	7.64e-05	GCTGCGGCTGCGGCGTG
LOC101495239	ERF	XP_012570542.1	217	237	-	17.6567	9.81e-08	7.65e-05	GCCCGCCACGCCGCAGCCGCA
LOC101497710	ERF	XP_012573264.1	1251	1271	-	20.6825	5.15e-08	7.66e-05	GCGCTATCATCGCCGCCTTCG
LOC101495239	ERF	XP_004510156.1	744	764	-	17.6119	1e-07	7.69e-05	TCCTGCGCCACTTCCAGCACA
LOC101493699	ERF	XP_004515598.1	41	60	-	20.5238	5.54e-08	7.77e-05	CACTTCTTTCGGCACCGCCG
LOC101493699	ERF	XP_004509259.1	347	366	-	20.5079	5.6e-08	7.77e-05	CAGGGTCGCCGCCGCCACAA
LOC101503531	ERF	XP_004504712.1	717	735	+	20.381	6.88e-08	7.8e-05	GGATGTGGGCGGCGGCACC
LOC101503531	ERF	XP_004516997.1	696	714	+	20.3492	7.02e-08	7.8e-05	TTGCGATAACGGCGGCGAA
LOC101492500	ERF	XP_012573264.1	1250	1264	+	21.6508	3.7e-08	7.84e-05	GCGAAGGCGGCGATG
LOC101504527	ERF	XP_004491318.1	1359	1379	+	19.381	9.19e-08	7.92e-05	TAACCAGAGCGGCGGCGGCCG
LOC101497710	ERF	XP_004510052.1	878	898	-	20.5873	5.49e-08	7.94e-05	TCGCCAGTTCCAGCGCCGGCA
LOC101494217	ERF	XP_012570542.1	422	436	-	21.0952	4.21e-08	7.96e-05	CCACATCCGCCGCAA
LOC101494217	ERF	XP_004512683.1	32	46	-	21	4.47e-08	7.96e-05	TCACCATCGCCGCCG
LOC101494217	ERF	XP_004498868.1	222	236	-	20.9524	4.61e-08	7.96e-05	TTACGGCCGCCGCCG
LOC101494217	ERF	XP_004492936.1	23	37	-	20.9365	4.65e-08	7.96e-05	TCGCCTGCACCGCCG
LOC101494217	ERF	XP_004485405.1	1418	1432	-	20.873	4.84e-08	7.96e-05	CATCCACCACCGCCA
LOC101494217	ERF	XP_004485405.1	941	955	-	20.8571	4.89e-08	7.96e-05	CCACCAGCGCCGCAA
LOC101494217	ERF	XP_012573264.1	912	926	-	20.8254	4.99e-08	7.96e-05	CCGCCGCCATCGCTG
LOC101504527	ERF	XP_004498868.1	932	952	+	19.3333	9.44e-08	7.97e-05	GCGAAGGCGTGGCGGCGGATa
LOC101504527	ERF	XP_004504712.1	723	743	+	19.3175	9.53e-08	7.97e-05	GGGCGGCGGCACCGGCAGCTT
LOC101506937	ERF	XP_004510156.1	174	194	-	18.7937	1.56e-07	8.01e-05	TGCAGCGCCACCACCACCTGG
LOC101494217	ERF	XP_012573264.1	918	932	-	20.7619	5.2e-08	8.06e-05	AGCGCGCCGCCGCCA
LOC101497710	ERF	XP_004491318.1	657	677	-	20.5238	5.72e-08	8.06e-05	ATGCCCGCGCTCCAGCCGCCA
LOC101491985	ERF	XP_004512683.1	29	43	-	22.3175	1.96e-08	8.09e-05	CCATCGCCGCCGGCG
LOC101491985	ERF	XP_004492936.1	23	37	-	22.2698	2.04e-08	8.09e-05	TCGCCTGCACCGCCG
LOC101506937	ERF	XP_004491518.1	1029	1049	-	18.746	1.6e-07	8.13e-05	CCCGGCGCCGCGCAGCAATCC
LOC101495239	ERF	XP_004504352.1	909	929	-	17.4328	1.1e-07	8.18e-05	TCTTCCGCATCCAGCACCACC
LOC101495239	ERF	XP_004504712.1	852	872	+	17.3881	1.12e-07	8.18e-05	GCCGCTGCAGCAGCGTCTGCC
LOC101495239	ERF	XP_012573264.1	1252	1272	-	17.3881	1.12e-07	8.18e-05	CGCGCTATCATCGCCGCCTTC
LOC101506937	ERF	XP_004510052.1	360	380	-	18.7143	1.63e-07	8.18e-05	TCCACCGCCGCATCAATACGG
LOC101506937	ERF	NP_001351681.1	414	434	-	18.6825	1.66e-07	8.21e-05	TCCAGCACCGGCAGCGCCGGG
LOC101506937	ERF	NP_001266141.1	396	416	+	18.6667	1.68e-07	8.21e-05	GGCGGCGCCGCAGCTGAAAGA
LOC101497710	ERF	NP_001266141.1	497	517	-	20.4127	6.16e-08	8.24e-05	GCGGAATTTCCGGCGCCGCCG
LOC101497710	ERF	NP_001265927.1	659	679	-	20.4127	6.16e-08	8.24e-05	GCGGAATTTCCGGCGCCGCCG
LOC101512899	ERF	XP_004504352.1	187	207	-	20.1587	8.26e-08	8.25e-05	AATATGCAGCGGCGGCGGGCT
LOC101512899	ERF	XP_004515598.1	825	845	+	20.1429	8.34e-08	8.25e-05	GTGCGGCTTTGGCGGCTGGTT
LOC101501427	ERF	XP_004504352.1	190	204	+	22.5714	2.17e-08	8.26e-05	CCGCCGCCGCTGCAT
LOC101504527	ERF	XP_004516997.1	696	716	+	19.2222	1.01e-07	8.27e-05	TTGCGATAACGGCGGCGAAGT
LOC101504527	ERF	XP_004512683.1	357	377	+	19.1746	1.04e-07	8.27e-05	GGAACTGGGCAGCGGCTGCGG
LOC101504527	ERF	XP_004498868.1	1199	1219	+	19.1746	1.04e-07	8.27e-05	ATGCGGATCTGGTGGTGGCGA
LOC101495239	ERF	XP_004492936.1	21	41	-	17.2985	1.18e-07	8.28e-05	TTGGTCGCCTGCACCGCCGCG
LOC101495239	ERF	XP_004516664.1	1761	1781	-	17.2985	1.18e-07	8.28e-05	GCCAGCAGATCCACCACCGCT
LOC101500525	ERF	XP_004506058.1	710	724	-	20.0794	8.96e-08	8.35e-05	CTTTATCCGCCGCCG
LOC101496212	ERF	XP_004510052.1	184	211	+	19.4127	1.2e-07	8.38e-05	GGCCGTCCGCCGCCGAAAACCGGCGATA
LOC101503531	ERF	XP_004509259.1	200	218	+	20.1746	7.84e-08	8.5e-05	AGCTGTGGCCGGCGGCGAC
LOC101492500	ERF	NP_001266141.1	394	408	+	21.4127	4.3e-08	8.51e-05	GCGGCGGCGCCGCAG
LOC101492500	ERF	XP_004504712.1	742	756	+	21.3968	4.35e-08	8.51e-05	TTTGCGGCGGCGatg
LOC101503531	ERF	XP_004491518.1	548	566	+	20.127	8.08e-08	8.55e-05	TGGCGAAAGCGGCGCTGCG
LOC101491273	ERF	XP_004493600.1	635	651	+	20.1587	7.01e-08	8.58e-05	CCGGCGGCGCGGATCCG
LOC101506937	ERF	XP_004492936.1	15	35	-	18.5556	1.78e-07	8.58e-05	GCCTGCACCGCCGCGGTGTTG
LOC101506937	ERF	XP_004491518.1	271	291	-	18.5397	1.8e-07	8.58e-05	GTTTTCGCCGCTGCCTTTGCC
LOC101506937	ERF	XP_004515598.1	33	53	-	18.5238	1.82e-07	8.58e-05	TTCGGCACCGCCGCGCCACGG
LOC101506937	ERF	XP_004512683.1	358	378	-	18.5079	1.83e-07	8.58e-05	GCCGCAGCCGCTGCCCAGTTC
LOC101497871	ERF	XP_004510156.1	399	419	-	19.1642	8.41e-08	8.61e-05	CCGCTGCCGCAGCCAATATCC
LOC101497871	ERF	XP_004491318.1	1356	1376	-	19.1493	8.47e-08	8.61e-05	CCGCCGCCGCTCTGGTTACGG
LOC101493699	ERF	XP_004506058.1	710	729	-	20.3016	6.44e-08	8.64e-05	ATCCACTTTATCCGCCGCCG
LOC101493699	ERF	XP_004485405.1	2637	2656	-	20.2698	6.58e-08	8.64e-05	CCCAGCCGCCCCAGCCGTTG
LOC101491273	ERF	XP_004504712.1	980	996	+	20.0635	7.38e-08	8.65e-05	GTGGCGGCGGCTTTCTG
LOC101491273	ERF	XP_004515598.1	40	56	+	20.0476	7.45e-08	8.65e-05	GCGGCGGTGCCGAAAGA
LOC101495993	ERF	XP_004516664.1	906	925	-	24.0794	4.58e-09	8.69e-05	GCACGCTCACGCCCACCGCC
LOC101495993	ERF	XP_004502631.1	121	140	-	23.7937	5.93e-09	8.69e-05	TCCGCATCCGCGCCGCCGCC
LOC101503531	ERF	XP_004515598.1	35	53	+	20.0635	8.41e-08	8.7e-05	GTGGCGCGGCGGTGCCGAA
LOC101494217	ERF	XP_004510156.1	334	348	+	20.5873	5.78e-08	8.74e-05	GCGGCGCCGGCGCAG
LOC101495239	ERF	XP_004512683.1	52	72	-	17.1343	1.28e-07	8.78e-05	CACGCTGCCGCCATAGCTGCC
LOC101495239	ERF	XP_004512683.1	24	44	-	17.1194	1.29e-07	8.78e-05	ACCATCGCCGCCGGCGCCAGT
LOC101492500	ERF	XP_004504712.1	977	991	+	21.2698	4.7e-08	8.86e-05	TGCGTGGCGGCGGCT
LOC101507986	ERF	XP_004510052.1	480	500	+	21.6418	2.4e-08	8.9e-05	TGGCGATGTGGCGGTGGTGGC
LOC101512899	ERF	XP_004510052.1	1131	1151	+	19.9841	9.18e-08	8.9e-05	CTGCAGCTGCAGCGGCGCGGT
LOC101503531	ERF	XP_012570542.1	290	308	+	19.9841	8.84e-08	8.94e-05	CGGTGatgCCGGCGCTGAA
LOC101491985	ERF	XP_004509259.1	350	364	-	22.0476	2.43e-08	8.96e-05	GGGTCGCCGCCGCCA
LOC101497871	ERF	NP_001266141.1	386	406	-	19.0299	9.04e-08	8.99e-05	GCGGCGCCGCCGCGCTTTTTT
LOC101493667	ERF	XP_012570542.1	422	436	-	21.5397	4.13e-08	9.01e-05	CCACATCCGCCGCAA
LOC101497871	ERF	XP_004498868.1	1149	1169	-	18.9851	9.26e-08	9.03e-05	CCGCTGCCGCAGCCCAGTTCC
LOC101497710	ERF	XP_004504352.1	905	925	-	20.2222	6.98e-08	9.05e-05	CCGCATCCAGCACCACCGCAC
LOC101497710	ERF	XP_012570542.1	422	442	-	20.1905	7.12e-08	9.05e-05	TATACACCACATCCGCCGCAA
LOC101497710	ERF	XP_004504712.1	743	763	-	20.1587	7.27e-08	9.05e-05	GCAGTTTCATCGCCGCCGCAA
LOC101497710	ERF	XP_004510156.1	176	196	-	20.1111	7.5e-08	9.1e-05	CCTGCAGCGCCACCACCACCT
LOC101497710	ERF	XP_004510156.1	338	358	-	20.0794	7.66e-08	9.1e-05	AATCCGGCACCTGCGCCGGCG
LOC101497710	ERF	XP_012570542.1	32	52	-	20.0476	7.82e-08	9.1e-05	GCGCGGTATCCGCCACCGGCA
LOC101503531	ERF	XP_004492936.1	17	35	+	19.9206	9.2e-08	9.1e-05	ACACCGCGGCGGTGCAGGC
LOC101493699	ERF	XP_004491518.1	545	564	-	20.1429	7.17e-08	9.11e-05	CAGCGCCGCTTTCGCCAGCT
LOC101493699	ERF	XP_004504352.1	908	927	-	20.1111	7.32e-08	9.11e-05	TTCCGCATCCAGCACCACCG
LOC101500468	ERF	XP_012570542.1	422	436	-	21.5397	4.13e-08	9.12e-05	CCACATCCGCCGCAA
LOC101503531	ERF	XP_004498868.1	1202	1220	+	19.8413	9.66e-08	9.16e-05	CGGATCTGGTGGTGGCGAC
LOC101503531	ERF	XP_004510156.1	336	354	-	19.8254	9.76e-08	9.16e-05	CGGCACCTGCGCCGGCGCC
LOC101503531	ERF	XP_004510052.1	362	380	+	19.8095	9.86e-08	9.16e-05	GTATTGATGCGGCGGTGGA
LOC101510560	ERF	XP_004509259.1	199	213	+	21.5079	3.44e-08	9.2e-05	CAGCTGTGGCCGGCG
LOC101510560	ERF	XP_004504712.1	726	740	-	21.4762	3.55e-08	9.2e-05	CTGCCGGTGCCGCCG
LOC101492500	ERF	XP_004516997.1	701	715	+	21.1429	5.08e-08	9.23e-05	ATAACGGCGGCGAAG
LOC101506937	ERF	XP_004510156.1	324	344	-	18.3492	2e-07	9.27e-05	GCCGGCGCCGCAAAGCTGCTG
LOC101493667	ERF	XP_004516997.1	702	716	-	21.381	4.6e-08	9.31e-05	ACTTCGCCGCCGTTA
LOC101493667	ERF	XP_012573264.1	918	932	-	21.3492	4.7e-08	9.31e-05	AGCGCGCCGCCGCCA
LOC101493667	ERF	XP_004498868.1	1538	1552	-	21.3175	4.8e-08	9.31e-05	ACTGCGCCGCCGCGC
LOC101493667	ERF	XP_004491318.1	1055	1069	-	21.2857	4.92e-08	9.31e-05	CCAGTTCCGCCGCCA
LOC101496212	ERF	XP_004491318.1	1352	1379	-	19.1587	1.36e-07	9.33e-05	CGGCCGCCGCCGCTCTGGTTACGGCCCG
LOC101506937	ERF	XP_004510052.1	802	822	-	18.3175	2.04e-07	9.34e-05	AAAGCCGCCGCTATAGCAGCA
LOC101497710	ERF	XP_004515598.1	38	58	-	19.9683	8.23e-08	9.37e-05	CTTCTTTCGGCACCGCCGCGC
LOC101495239	ERF	XP_004489174.1	79	99	-	16.9552	1.4e-07	9.38e-05	GCCGCTGCCCACGCTGCTGCT
LOC101500468	ERF	XP_004516997.1	702	716	-	21.381	4.6e-08	9.43e-05	ACTTCGCCGCCGTTA
LOC101500468	ERF	XP_012573264.1	918	932	-	21.3492	4.7e-08	9.43e-05	AGCGCGCCGCCGCCA
LOC101500468	ERF	XP_004498868.1	1538	1552	-	21.3175	4.8e-08	9.43e-05	ACTGCGCCGCCGCGC
LOC101500468	ERF	XP_004491318.1	1055	1069	-	21.2857	4.92e-08	9.43e-05	CCAGTTCCGCCGCCA
LOC101495239	ERF	XP_004488701.1	759	779	-	16.8955	1.44e-07	9.44e-05	CTCACCAGCGGATCCGCCACT
LOC101495239	ERF	XP_004510156.1	381	401	-	16.8806	1.45e-07	9.44e-05	TCCACCATCAGCGGCAGCGCC
LOC101493699	ERF	NP_001351681.1	281	300	-	20.0159	7.81e-08	9.47e-05	CGCCAGCGCGGTCGCCAGCA
LOC101512899	ERF	XP_004504712.1	734	754	+	19.8413	1e-07	9.49e-05	CCGGCAGCTTTGCGGCGGCGa
LOC101494217	ERF	XP_004504352.1	187	201	+	20.4127	6.46e-08	9.51e-05	AGCCCGCCGCCGCTG
LOC101506937	ERF	XP_012570542.1	208	228	-	18.254	2.11e-07	9.57e-05	GCCGCAGCCGCAGCCCAGTTC
LOC101496212	ERF	XP_004498868.1	1154	1181	-	19.0635	1.43e-07	9.59e-05	CTGCAAATGCCGCCGCTGCCGCAGCCCA
LOC101506937	ERF	XP_004510029.1	729	749	-	18.2222	2.15e-07	9.63e-05	TTCAGCGCCGCAATCGCCAGA
LOC101496212	ERF	XP_004510052.1	827	854	-	19	1.47e-07	9.64e-05	TTCAGCGCGCCGCCGCACACCGCGTTCA
LOC101496212	ERF	XP_004510029.1	674	701	-	18.9524	1.51e-07	9.64e-05	ATATATTCGCCGCCTTTAATGCAGCCAT
LOC101496212	ERF	XP_004491518.1	1426	1453	-	18.9365	1.52e-07	9.64e-05	CCAGAAACGCCGCCACACGTTCATCGTT
LOC101494217	ERF	XP_012570542.1	216	230	-	20.3492	6.74e-08	9.68e-05	ACGCCGCAGCCGCAG
LOC101494217	ERF	XP_004509259.1	453	467	-	20.3016	6.94e-08	9.71e-05	ACCACGCCGCCGCTG
LOC101512899	ERF	XP_004485405.1	932	952	+	19.7619	1.05e-07	9.76e-05	ATACCGATATTGCGGCGCTGG
LOC101504527	ERF	NP_001351681.1	284	304	+	18.8254	1.26e-07	9.76e-05	TGGCGACCGCGCTGGCGCTGC
LOC101504527	ERF	XP_004485405.1	1409	1429	+	18.8254	1.26e-07	9.76e-05	GCCCGCGTCTGGCGGTGGTGG
LOC101504527	ERF	XP_012570542.1	210	230	+	18.8095	1.28e-07	9.76e-05	ACTGGGCTGCGGCTGCGGCGT
LOC101507986	ERF	XP_004509259.1	342	362	+	21.3731	2.84e-08	9.77e-05	GGGCATTGTGGCGGCGGCGAC
LOC101492500	ERF	XP_004515598.1	37	51	+	21	5.57e-08	9.77e-05	GGCGCGGCGGTGCCG
LOC101503531	ERF	NP_001266141.1	392	410	+	19.6667	1.08e-07	9.81e-05	GCGCGGCGGCGCCGCAGCT
LOC101503531	ERF	XP_004509259.1	341	359	+	19.619	1.11e-07	9.81e-05	TGGGCATTGTGGCGGCGGC
LOC101503531	ERF	XP_012573264.1	731	749	+	19.6032	1.12e-07	9.81e-05	tgGTGGATGTGGCGGAAGA
LOC101497871	ERF	XP_004485405.1	1041	1061	-	18.791	1.03e-07	9.82e-05	CTGCCGCCGCTACGGCCATAC
LOC101512899	ERF	XP_004489801.1	693	713	+	19.7143	1.08e-07	9.84e-05	TTATGAAATTGGCGGCGGCCT
LOC101504527	ERF	XP_004489174.1	807	827	+	18.7619	1.31e-07	9.89e-05	TGGCGTGGGCGGCGGCACCCG
LOC101503531	ERF	XP_004510156.1	333	351	-	19.5556	1.15e-07	9.91e-05	CACCTGCGCCGGCGCCGCA
LOC101512899	ERF	XP_004510052.1	359	379	+	19.6667	1.11e-07	9.93e-05	CCCGTATTGATGCGGCGGTGG
LOC101507273	LBD	XP_004510156.1	336	356	-	31.2381	2.34e-11	8.05e-07	TCCGGCACCTGCGCCGGCGCC
LOC101507273	LBD	XP_004491318.1	1366	1386	-	30.619	3.86e-11	8.05e-07	ATCGCCACGGCCGCCGCCGCT
LOC101507273	LBD	NP_001351681.1	597	617	+	29.2381	1.15e-10	1.6e-06	GCCGCCGGATGCGCCGCTGCG
LOC101507273	LBD	XP_004512683.1	27	47	-	28.8254	1.58e-10	1.64e-06	TTCACCATCGCCGCCGGCGCC
LOC101507273	LBD	XP_004498868.1	1156	1176	-	27.6349	3.83e-10	3.19e-06	AATGCCGCCGCTGCCGCAGCC
LOC101507273	LBD	XP_012570542.1	285	305	-	27.1905	5.3e-10	3.23e-06	AGCGCCGGCATCACCGGCGCA
LOC101507273	LBD	NP_001351681.1	594	614	+	27.1587	5.42e-10	3.23e-06	GGCGCCGCCGGATGCGCCGCT
LOC101507273	LBD	NP_001351681.1	594	614	-	26.5238	8.54e-10	4.45e-06	AGCGGCGCATCCGGCGGCGCC
LOC101510654	LBD	NP_001351681.1	595	615	+	28.8413	1.3e-10	5.16e-06	GCGCCGCCGGATGCGCCGCTG
LOC101507273	LBD	XP_012573264.1	910	930	-	26.1429	1.12e-09	5.17e-06	CGCGCCGCCGCCATCGCTGCT
LOC101507273	LBD	XP_004510156.1	333	353	-	25.8889	1.33e-09	5.55e-06	GGCACCTGCGCCGGCGCCGCA
LOC101510654	LBD	XP_012570542.1	287	307	-	27.6349	3.53e-10	7e-06	TCAGCGCCGGCATCACCGGCG
LOC101507273	LBD	XP_004491518.1	513	533	-	25.1746	2.18e-09	8.26e-06	TCCACCACCGCATACGGCGGC
LOC101507273	LBD	XP_012570542.1	285	305	+	24.8095	2.79e-09	9.69e-06	TGCGCCGGTGatgCCGGCGCT
LOC101507273	LBD	XP_004504712.1	721	741	-	24.5397	3.35e-09	1.05e-05	GCTGCCGGTGCCGCCGCCCAC
LOC101507273	LBD	NP_001266141.1	393	413	-	24.4603	3.53e-09	1.05e-05	TTCAGCTGCGGCGCCGCCGCG
LOC101507273	LBD	XP_004498868.1	1153	1173	-	24.1587	4.31e-09	1.2e-05	GCCGCCGCTGCCGCAGCCCAG
LOC101507273	LBD	XP_004492936.1	18	38	-	23.7302	5.72e-09	1.49e-05	GTCGCCTGCACCGCCGCGGTG
LOC101510654	LBD	XP_004491318.1	1368	1388	-	25.8571	1.41e-09	1.87e-05	ATATCGCCACGGCCGCCGCCG
LOC101507273	LBD	NP_001351681.1	597	617	-	23.127	8.45e-09	2.07e-05	CGCAGCGGCGCATCCGGCGGC
LOC101507273	LBD	XP_004510156.1	333	353	+	22.8889	9.84e-09	2.14e-05	TGCGGCGCCGGCGCAGGTGCC
LOC101507273	LBD	XP_004516664.1	816	836	-	22.873	9.94e-09	2.14e-05	CTCGCCGCTTTTTCCGCCAGG
LOC101507273	LBD	XP_004485405.1	60	80	-	22.8254	1.02e-08	2.14e-05	CGCAGCGCCGCATACGCCGCA
LOC101507273	LBD	XP_012573264.1	774	794	+	22.619	1.17e-08	2.24e-05	CCCGCATCCGACCCCGGCGAC
LOC101507273	LBD	XP_004504712.1	1111	1131	-	22.6032	1.18e-08	2.24e-05	TTCGCCGTTTTTCACGCCGCC
LOC101510654	LBD	NP_001351681.1	596	616	-	25	2.66e-09	2.32e-05	GCAGCGGCGCATCCGGCGGCG
LOC101510654	LBD	XP_004510052.1	1018	1038	+	24.5714	3.63e-09	2.32e-05	GATCCGCCGAAACTGGCGCCG
LOC101510654	LBD	XP_004510156.1	338	358	-	24.3016	4.4e-09	2.32e-05	AATCCGGCACCTGCGCCGGCG
LOC101510654	LBD	XP_004498868.1	1155	1175	-	24.2063	4.71e-09	2.32e-05	ATGCCGCCGCTGCCGCAGCCC
LOC101510654	LBD	XP_004510156.1	335	355	-	24.127	4.99e-09	2.32e-05	CCGGCACCTGCGCCGGCGCCG
LOC101510654	LBD	NP_001351681.1	592	612	+	24.0476	5.27e-09	2.32e-05	GTGGCGCCGCCGGATGCGCCG
LOC101510654	LBD	XP_012573264.1	909	929	-	23.7937	6.3e-09	2.5e-05	GCGCCGCCGCCATCGCTGCTA
LOC101507273	LBD	XP_004512683.1	24	44	-	22.3175	1.41e-08	2.56e-05	ACCATCGCCGCCGGCGCCAGT
LOC101510654	LBD	XP_004492936.1	20	40	-	23.3016	8.86e-09	2.85e-05	TGGTCGCCTGCACCGCCGCGG
LOC101510654	LBD	XP_004516664.1	818	838	-	23.1905	9.56e-09	2.85e-05	AGCTCGCCGCTTTTTCCGCCA
LOC101510654	LBD	XP_004491518.1	512	532	-	23.1111	1.01e-08	2.85e-05	CCACCACCGCATACGGCGGCA
LOC101510654	LBD	XP_012570542.1	283	303	+	22.873	1.19e-08	2.85e-05	ATTGCGCCGGTGatgCCGGCG
LOC101510654	LBD	XP_004504712.1	723	743	-	22.8095	1.24e-08	2.85e-05	AAGCTGCCGGTGCCGCCGCCC
LOC101510654	LBD	XP_012570542.1	213	233	-	22.7619	1.28e-08	2.85e-05	GCCACGCCGCAGCCGCAGCCC
LOC101510654	LBD	NP_001266141.1	499	519	+	22.6508	1.38e-08	2.85e-05	GCGGCGCCGGAAATTCCGCAG
LOC101510654	LBD	NP_001265927.1	661	681	+	22.6508	1.38e-08	2.85e-05	GCGGCGCCGGAAATTCCGCAG
LOC101510654	LBD	XP_004498868.1	1158	1178	-	22.6349	1.39e-08	2.85e-05	CAAATGCCGCCGCTGCCGCAG
LOC101510654	LBD	XP_004515598.1	27	47	-	22.5238	1.5e-08	2.85e-05	ACCGCCGCGCCACGGCCGCCG
LOC101510654	LBD	XP_004510156.1	332	352	-	22.4921	1.53e-08	2.85e-05	GCACCTGCGCCGGCGCCGCAA
LOC101510654	LBD	NP_001266141.1	503	523	-	22.3016	1.74e-08	2.85e-05	GCGGCTGCGGAATTTCCGGCG
LOC101510654	LBD	NP_001265927.1	665	685	-	22.3016	1.74e-08	2.85e-05	GCGGCTGCGGAATTTCCGGCG
LOC101510654	LBD	XP_004516664.1	1382	1402	-	22.2698	1.77e-08	2.85e-05	CCACCGCCATCACGCCCGGCA
LOC101510654	LBD	XP_004515076.1	479	499	-	22.2222	1.83e-08	2.85e-05	CAAACGGCGCATCATCCGCCA
LOC101510654	LBD	XP_004512683.1	29	49	-	22.1746	1.89e-08	2.85e-05	GTTTCACCATCGCCGCCGGCG
LOC101510654	LBD	XP_004506058.1	213	233	-	22.0794	2.01e-08	2.85e-05	CTCACGCCGCAGCCCGCGCCC
LOC101510654	LBD	XP_004489174.1	807	827	-	22.0794	2.01e-08	2.85e-05	CGGGTGCCGCCGCCCACGCCA
LOC101507273	LBD	XP_004515076.1	477	497	-	21.9524	1.78e-08	3.08e-05	AACGGCGCATCATCCGCCAGC
LOC101507273	LBD	NP_001266141.1	501	521	+	21.8254	1.92e-08	3.08e-05	GGCGCCGGAAATTCCGCAGCC
LOC101507273	LBD	NP_001265927.1	663	683	+	21.8254	1.92e-08	3.08e-05	GGCGCCGGAAATTCCGCAGCC
LOC101507273	LBD	XP_004515598.1	25	45	-	21.7302	2.04e-08	3.15e-05	CGCCGCGCCACGGCCGCCGCT
LOC101507273	LBD	XP_004510052.1	879	899	-	21.5714	2.25e-08	3.27e-05	TTCGCCAGTTCCAGCGCCGGC
LOC101507273	LBD	XP_004485405.1	57	77	-	21.5238	2.32e-08	3.27e-05	AGCGCCGCATACGCCGCATCG
LOC101507273	LBD	XP_004510156.1	336	356	+	21.4603	2.41e-08	3.27e-05	GGCGCCGGCGCAGGTGCCGGA
LOC101507273	LBD	XP_004510052.1	1020	1040	+	21.4444	2.43e-08	3.27e-05	TCCGCCGAAACTGGCGCCGAG
LOC101507273	LBD	XP_004515076.1	274	294	-	21.3016	2.65e-08	3.45e-05	ATCGCCGCCTTTGCCGCACGC
LOC101510654	LBD	XP_004510156.1	337	357	+	21.6667	2.63e-08	3.56e-05	GCGCCGGCGCAGGTGCCGGAT
LOC101510654	LBD	XP_004491518.1	515	535	-	21.6349	2.69e-08	3.56e-05	CATCCACCACCGCATACGGCG
LOC101507273	LBD	XP_004506058.1	711	731	-	21.1746	2.87e-08	3.62e-05	ACATCCACTTTATCCGCCGCC
LOC101507273	LBD	NP_001351681.1	414	434	-	21.0635	3.07e-08	3.76e-05	TCCAGCACCGGCAGCGCCGGG
LOC101507273	LBD	NP_001265927.1	555	575	-	20.9206	3.35e-08	3.98e-05	TTCAGCAGGGTCGCCGCCGCG
LOC101507273	LBD	NP_001266141.1	501	521	-	20.7302	3.75e-08	4.23e-05	GGCTGCGGAATTTCCGGCGCC
LOC101507273	LBD	NP_001265927.1	663	683	-	20.7302	3.75e-08	4.23e-05	GGCTGCGGAATTTCCGGCGCC
LOC101507273	LBD	XP_004510156.1	330	350	-	20.6508	3.94e-08	4.32e-05	ACCTGCGCCGGCGCCGCAAAG
LOC101507273	LBD	XP_004510156.1	4	24	-	20.5556	4.17e-08	4.44e-05	GCCCCAGCCGCAGCAGCAGCC
LOC101507273	LBD	NP_001351681.1	291	311	-	20.4921	4.33e-08	4.44e-05	TCTTCCGGCAGCGCCAGCGCG
LOC101507273	LBD	XP_004489174.1	805	825	-	20.4762	4.37e-08	4.44e-05	GGTGCCGCCGCCCACGCCAAA
LOC101510654	LBD	XP_012573264.1	912	932	-	21.2063	3.54e-08	4.53e-05	AGCGCGCCGCCGCCATCGCTG
LOC101510654	LBD	XP_004502631.1	117	137	-	21.0952	3.8e-08	4.71e-05	GCATCCGCGCCGCCGCCGCAA
LOC101507273	LBD	XP_004510156.1	339	359	-	20.2857	4.9e-08	4.86e-05	CAATCCGGCACCTGCGCCGGC
LOC101510654	LBD	XP_004510156.1	334	354	+	20.8889	4.33e-08	5.11e-05	GCGGCGCCGGCGCAGGTGCCG
LOC101510654	LBD	XP_004485405.1	59	79	-	20.873	4.38e-08	5.11e-05	GCAGCGCCGCATACGCCGCAT
LOC101507273	LBD	XP_012573264.1	907	927	-	20.0794	5.53e-08	5.29e-05	GCCGCCGCCATCGCTGCTAAT
LOC101507273	LBD	NP_001351681.1	591	611	-	20.0635	5.59e-08	5.29e-05	GGCGCATCCGGCGGCGCCACC
LOC101510654	LBD	XP_004510156.1	373	393	+	20.746	4.74e-08	5.37e-05	GCGGATCCGGCGCTGCCGCTG
LOC101510654	LBD	XP_004510052.1	1022	1042	-	20.6508	5.03e-08	5.45e-05	TGCTCGGCGCCAGTTTCGGCG
LOC101510654	LBD	XP_004509259.1	447	467	-	20.6349	5.08e-08	5.45e-05	ACCACGCCGCCGCTGCTGCCC
LOC101510654	LBD	XP_004510156.1	3	23	-	20.5397	5.39e-08	5.49e-05	CCCCAGCCGCAGCAGCAGCCC
LOC101510654	LBD	XP_004504712.1	1113	1133	-	20.4921	5.56e-08	5.49e-05	AGTTCGCCGTTTTTCACGCCG
LOC101510654	LBD	NP_001266141.1	395	415	-	20.4603	5.67e-08	5.49e-05	CTTTCAGCTGCGGCGCCGCCG
LOC101510654	LBD	XP_004506058.1	713	733	-	20.4603	5.67e-08	5.49e-05	CCACATCCACTTTATCCGCCG
LOC101507273	LBD	XP_004515598.1	22	42	-	19.873	6.25e-08	5.79e-05	CGCGCCACGGCCGCCGCTCGC
LOC101507273	LBD	XP_012570542.1	36	56	-	19.8254	6.43e-08	5.82e-05	CTCAGCGCGGTATCCGCCACC
LOC101507273	LBD	XP_012570542.1	214	234	-	19.7143	6.86e-08	6.08e-05	CGCCACGCCGCAGCCGCAGCC
LOC101507273	LBD	XP_004509259.1	445	465	-	19.6349	7.19e-08	6.22e-05	CACGCCGCCGCTGCTGCCCAC
LOC101507273	LBD	XP_004491518.1	546	566	-	19.6032	7.32e-08	6.22e-05	CGCAGCGCCGCTTTCGCCAGC
LOC101507273	LBD	NP_001351681.1	414	434	+	19.4762	7.88e-08	6.31e-05	CCCGGCGCTGCCGGTGCTGGA
LOC101507273	LBD	XP_004491318.1	655	675	-	19.4762	7.88e-08	6.31e-05	GCCCGCGCTCCAGCCGCCATC
LOC101507273	LBD	XP_004491518.1	543	563	-	19.4603	7.96e-08	6.31e-05	AGCGCCGCTTTCGCCAGCTGC
LOC101507273	LBD	XP_004502631.1	115	135	-	19.4444	8.03e-08	6.31e-05	ATCCGCGCCGCCGCCGCAATA
LOC101507273	LBD	NP_001351681.1	588	608	-	19.4127	8.18e-08	6.31e-05	GCATCCGGCGGCGCCACCACG
LOC101510654	LBD	XP_004510156.1	341	361	-	20.127	6.97e-08	6.43e-05	TCCAATCCGGCACCTGCGCCG
LOC101510654	LBD	XP_004499918.1	932	952	-	20.127	6.97e-08	6.43e-05	CTTCCACCAGGCTTTCCGCCG
LOC101510654	LBD	NP_001351681.1	599	619	-	20.0794	7.17e-08	6.47e-05	TACGCAGCGGCGCATCCGGCG
LOC101510654	LBD	XP_004489174.1	84	104	-	19.9524	7.75e-08	6.84e-05	CCAAAGCCGCTGCCCACGCTG
LOC101507273	LBD	XP_004502631.1	118	138	-	19.1905	9.3e-08	6.92e-05	CGCATCCGCGCCGCCGCCGCA
LOC101507273	LBD	XP_004504352.1	906	926	-	19.1905	9.3e-08	6.92e-05	TCCGCATCCAGCACCACCGCA
LOC101507273	LBD	XP_004509259.1	348	368	-	19.0794	9.92e-08	7.25e-05	CCCAGGGTCGCCGCCGCCACA
LOC101507273	LBD	XP_004510052.1	1129	1149	-	19.0317	1.02e-07	7.32e-05	CGCGCCGCTGCAGCTGCAGGT
LOC101507273	LBD	XP_004504712.1	654	674	+	18.9841	1.05e-07	7.35e-05	TCTGCCGGTGCAGCAGCTGCT
LOC101507273	LBD	NP_001351681.1	288	308	-	18.9524	1.07e-07	7.35e-05	TCCGGCAGCGCCAGCGCGGTC
LOC101507273	LBD	XP_004510052.1	1020	1040	-	18.9365	1.08e-07	7.35e-05	CTCGGCGCCAGTTTCGGCGGA
LOC101507273	LBD	XP_004510156.1	744	764	-	18.873	1.12e-07	7.5e-05	TCCTGCGCCACTTCCAGCACA
LOC101510654	LBD	XP_004510052.1	881	901	-	19.746	8.79e-08	7.59e-05	CTTTCGCCAGTTCCAGCGCCG
LOC101507273	LBD	XP_004510156.1	177	197	-	18.7937	1.17e-07	7.63e-05	TCCTGCAGCGCCACCACCACC
LOC101507273	LBD	XP_012573264.1	615	635	-	18.7778	1.18e-07	7.63e-05	GGCACCTGTTCCAGCGCCGCA
LOC101507273	LBD	XP_004485405.1	1042	1062	-	18.7619	1.19e-07	7.63e-05	GCTGCCGCCGCTACGGCCATA
LOC101510680	LBD	NP_001266141.1	505	519	+	22.8571	3.48e-09	8.07e-05	CCGGAAATTCCGCAG
LOC101510680	LBD	NP_001265927.1	667	681	+	22.8571	3.48e-09	8.07e-05	CCGGAAATTCCGCAG
LOC101510654	LBD	XP_004516997.1	696	716	-	19.5873	9.68e-08	8.08e-05	ACTTCGCCGCCGTTATCGCAA
LOC101510654	LBD	NP_001265927.1	557	577	-	19.5714	9.78e-08	8.08e-05	CTTTCAGCAGGGTCGCCGCCG
LOC101510654	LBD	XP_004485405.1	62	82	-	19.5238	1.01e-07	8.15e-05	TACGCAGCGCCGCATACGCCG
LOC101507273	LBD	XP_004491318.1	649	669	-	18.6032	1.3e-07	8.22e-05	GCTCCAGCCGCCATCGCTGCC
LOC101510654	LBD	XP_004506058.1	222	242	-	19.4444	1.06e-07	8.29e-05	CCAAAGCCGCTCACGCCGCAG
LOC101510654	LBD	XP_004491318.1	1365	1385	-	19.4286	1.07e-07	8.29e-05	TCGCCACGGCCGCCGCCGCTC
LOC101510654	LBD	NP_001351681.1	281	301	-	19.3492	1.12e-07	8.53e-05	GCGCCAGCGCGGTCGCCAGCA
LOC101510654	LBD	XP_004491318.1	657	677	-	19.2857	1.16e-07	8.69e-05	ATGCCCGCGCTCCAGCCGCCA
LOC101507273	LBD	XP_012570542.1	211	231	-	18.4286	1.44e-07	8.94e-05	CACGCCGCAGCCGCAGCCCAG
LOC101507273	LBD	XP_004485405.1	2635	2655	-	18.381	1.48e-07	9.05e-05	CCAGCCGCCCCAGCCGTTGCA
LOC101510654	LBD	XP_004510052.1	497	517	-	19.1587	1.25e-07	9.12e-05	CCCACGCCGCGCTGCTCGCCA
LOC101510654	LBD	XP_004510052.1	877	897	+	19.1429	1.26e-07	9.12e-05	CTGCCGGCGCTGGAACTGGCG
LOC101510654	LBD	XP_004510156.1	405	425	-	19.1111	1.29e-07	9.13e-05	AAACGGCCGCTGCCGCAGCCA
LOC101510654	LBD	XP_004491318.1	648	668	-	19.0794	1.31e-07	9.14e-05	CTCCAGCCGCCATCGCTGCCC
LOC101507273	LBD	NP_001266141.1	492	512	-	18.3016	1.55e-07	9.18e-05	ATTTCCGGCGCCGCCGCGCCC
LOC101507273	LBD	NP_001265927.1	654	674	-	18.3016	1.55e-07	9.18e-05	ATTTCCGGCGCCGCCGCGCCC
LOC101507273	LBD	XP_004499918.1	304	324	-	18.2698	1.57e-07	9.18e-05	CGGGCCGCCAATGCCGCAGCC
LOC101507273	LBD	XP_004499918.1	930	950	-	18.254	1.59e-07	9.18e-05	TCCACCAGGCTTTCCGCCGCA
LOC101507273	LBD	XP_004504352.1	1968	1988	-	18.1905	1.65e-07	9.39e-05	TCCGGCGCCGGGCACGCCAGG
LOC101510654	LBD	XP_004485405.1	2637	2657	-	18.9841	1.39e-07	9.51e-05	TCCCAGCCGCCCCAGCCGTTG
LOC101507273	LBD	XP_004510156.1	339	359	+	18.127	1.7e-07	9.6e-05	GCCGGCGCAGGTGCCGGATTG
LOC101507273	LBD	XP_004512683.1	30	50	-	18.0952	1.74e-07	9.64e-05	AGTTTCACCATCGCCGCCGGC
LOC101507273	LBD	NP_001266141.1	393	413	+	18.0635	1.77e-07	9.68e-05	CGCGGCGGCGCCGCAGCTGAA
LOC101507273	LBD	XP_004491518.1	18	38	+	17.9841	1.85e-07	9.7e-05	TatgGCGCTGCCGCTGCTGGC
LOC101507273	LBD	NP_001351681.1	288	308	+	17.9841	1.85e-07	9.7e-05	GACCGCGCTGGCGCTGCCGGA
LOC101507273	LBD	XP_004485405.1	2077	2097	-	17.9841	1.85e-07	9.7e-05	GCTGCCGTTTTCCACGCCATC
LOC101507273	LBD	XP_004492936.1	21	41	-	17.9683	1.86e-07	9.7e-05	TTGGTCGCCTGCACCGCCGCG
LOC101507273	LBD	XP_004491318.1	558	578	-	17.9365	1.9e-07	9.72e-05	CCCGGCACATACACCTGCGCG
LOC101507273	LBD	XP_004489174.1	82	102	-	17.9206	1.91e-07	9.72e-05	AAAGCCGCTGCCCACGCTGCT
LOC101512737	Nin-like	XP_004510156.1	47	61	+	23.9104	3.82e-11	8.96e-07	GCAGCAGCAGCAGCG
LOC101512737	Nin-like	XP_004491518.1	65	79	+	23.9104	3.82e-11	8.96e-07	GCAGCAGCAGCAGCG
LOC101512737	Nin-like	XP_004485405.1	2609	2623	+	23.6567	4.81e-11	8.96e-07	CCAGCAGCAGCGGCC
LOC101512737	Nin-like	XP_004510029.1	659	673	-	23.4478	8.32e-11	1.13e-06	GCAGCAGCAGCAGGC
LOC101512737	Nin-like	XP_004510156.1	4	18	-	23.3134	1.01e-10	1.13e-06	GCCGCAGCAGCAGCC
LOC101512737	Nin-like	XP_004491518.1	62	76	+	23.0746	1.81e-10	1.45e-06	GCAGCAGCAGCAGCA
LOC101512737	Nin-like	XP_004510156.1	149	163	+	23.0746	1.81e-10	1.45e-06	GCAGCAGCAGCAGCA
LOC101512737	Nin-like	XP_004510156.1	50	64	+	22.5672	4.7e-10	3.28e-06	GCAGCAGCAGCGCGG
LOC101512737	Nin-like	XP_004502631.1	893	907	-	22.3731	6.19e-10	3.85e-06	CCTGCAGCAGCGGGG
LOC101512737	Nin-like	XP_004510156.1	152	166	+	21.9104	1.56e-09	8.74e-06	GCAGCAGCAGCAGCT
LOC101512737	Nin-like	XP_004509259.1	446	460	+	21.4179	3.52e-09	1.79e-05	TGGGCAGCAGCGGCG
LOC101512737	Nin-like	XP_004491518.1	458	472	-	21.3284	4.1e-09	1.84e-05	TCTGCAGCAGCAGCG
LOC101512737	Nin-like	XP_004504352.1	1955	1969	+	21.2985	4.28e-09	1.84e-05	ATAGCAGCAGCGGCC
LOC101512737	Nin-like	XP_004512086.1	458	472	-	21.2388	4.7e-09	1.88e-05	GCAGCAGCAGGGTCG
LOC101512737	Nin-like	XP_004502631.1	185	199	+	21.0299	6.61e-09	2.35e-05	TGAGCAGCAGCGGCA
LOC101512737	Nin-like	XP_004504352.1	782	796	+	21.0149	6.72e-09	2.35e-05	TGAGCAGCAGCAGCG
LOC101512737	Nin-like	XP_004491518.1	59	73	+	20.8507	8.37e-09	2.6e-05	CGAGCAGCAGCAGCA
LOC101512737	Nin-like	XP_004512086.1	461	475	-	20.8507	8.37e-09	2.6e-05	TCTGCAGCAGCAGGG
LOC101512737	Nin-like	XP_004491518.1	455	469	-	20.7313	1.01e-08	2.96e-05	GCAGCAGCAGCGGTT
LOC101512737	Nin-like	XP_004502631.1	800	814	-	20.5373	1.28e-08	3.45e-05	GCGGCAGCAGACGGC
LOC101512737	Nin-like	XP_004510029.1	215	229	+	20.5224	1.3e-08	3.45e-05	GCAGCAGCACCGCGC
LOC101512737	Nin-like	XP_004488701.1	464	478	-	20.2836	1.88e-08	4.64e-05	CCGGCAGCACCAGCG
LOC101512737	Nin-like	XP_004515076.1	578	592	-	20.2687	1.91e-08	4.64e-05	GACGCAGCAGCGCGC
LOC101512737	Nin-like	XP_004510029.1	83	97	+	20.0448	2.58e-08	5.71e-05	GTAGCAGCAGCCCGG
LOC101512737	Nin-like	XP_004510029.1	656	670	-	20.0299	2.62e-08	5.71e-05	GCAGCAGCAGGCACA
LOC101512737	Nin-like	XP_004504352.1	785	799	+	20	2.73e-08	5.71e-05	GCAGCAGCAGCGATA
LOC101512737	Nin-like	XP_004504712.1	1142	1156	-	19.9851	2.79e-08	5.71e-05	TCTGCAGCAGCGCGG
LOC101512737	Nin-like	XP_004510029.1	212	226	+	19.9701	2.86e-08	5.71e-05	CGAGCAGCAGCACCG
LOC101512737	Nin-like	XP_004509259.1	449	463	+	19.6716	4.16e-08	7.59e-05	GCAGCAGCGGCGGCG
LOC101512737	Nin-like	XP_004493600.1	491	505	+	19.6716	4.16e-08	7.59e-05	TGAGCAGCAGCGCGG
LOC101512737	Nin-like	XP_004504712.1	89	103	-	19.6418	4.41e-08	7.59e-05	TCAGCAGCAGCAGGT
LOC101512737	Nin-like	XP_004504712.1	855	869	+	19.6269	4.52e-08	7.59e-05	GCTGCAGCAGCGTCT
LOC101512737	Nin-like	XP_004510156.1	146	160	+	19.597	4.67e-08	7.59e-05	ATAGCAGCAGCAGCA
LOC101512737	Nin-like	XP_004498868.1	815	829	+	19.597	4.67e-08	7.59e-05	ATAGCAGCAGCAGCA
LOC101512737	Nin-like	XP_004510156.1	44	58	+	19.5821	4.79e-08	7.59e-05	TTAGCAGCAGCAGCA
LOC101512737	Nin-like	XP_004492936.1	710	724	-	19.5672	4.89e-08	7.59e-05	TCGCCAGCAGCGGGC
LOC101512737	Nin-like	XP_004510156.1	201	215	+	19.5373	5.05e-08	7.63e-05	GCAGCAGCAGAAACC
LOC101512737	Nin-like	XP_004491518.1	68	82	+	19.4627	5.54e-08	7.89e-05	GCAGCAGCAGCGAAA
LOC101512737	Nin-like	XP_004510029.1	662	676	-	19.4627	5.54e-08	7.89e-05	CATGCAGCAGCAGCA
LOC101512737	Nin-like	XP_004498868.1	818	832	+	19.4478	5.65e-08	7.89e-05	GCAGCAGCAGCAAAG
LOC101512737	Nin-like	XP_004504712.1	660	674	+	19.403	5.97e-08	8.1e-05	GGTGCAGCAGCTGCT
LOC101512737	Nin-like	XP_004485405.1	1724	1738	+	19.3881	6.13e-08	8.1e-05	CGGGCAGCAACGGCG
LOC101512737	Nin-like	XP_004510156.1	74	88	-	19.3731	6.23e-08	8.1e-05	GCGGCAGCATCAGGC
LOC101512737	Nin-like	XP_004498868.1	500	514	-	19.2687	7.03e-08	8.75e-05	TCTGCAGCACCAGCG
LOC101512737	Nin-like	XP_004489174.1	896	910	+	19.2537	7.18e-08	8.75e-05	GCAGCAGCAACGTGC
LOC101512737	Nin-like	XP_004510156.1	407	421	+	19.209	7.54e-08	8.75e-05	GCTGCGGCAGCGGCC
LOC101512737	Nin-like	XP_004491518.1	26	40	-	19.194	7.67e-08	8.75e-05	TCGCCAGCAGCGGCA
LOC101512737	Nin-like	XP_004489801.1	203	217	+	19.194	7.67e-08	8.75e-05	GCTGCGGCAGCGGCG
LOC101512737	Nin-like	XP_004498868.1	1157	1171	+	19.194	7.67e-08	8.75e-05	GCTGCGGCAGCGGCG
LOC101512737	Nin-like	XP_004488701.1	692	706	-	19.0896	8.72e-08	9.75e-05	GCTGCAGCAGCAGTT

## Sheet:  Supplementary Table 7
	Supplementary Table 7. List of GO terms with their description of methyltransferases using Blast2GO software
Tags	SeqName	Description		Length	#Hits	e-Value	sim mean	#GO	GO IDs	GO Names	Enzyme Codes	Enzyme Names
[INTERPRO BLASTED MAPPED ANNOTATED]	XP_004489801.1	2-phytyl-14-beta-naphthoquinone methyltransferase chloroplastic	TRUE	246	20	0	92.43	5	P:GO:0006744; P:GO:0032259; P:GO:0042372; F:GO:0052624; C:GO:0009507	P:ubiquinone biosynthetic process; P:methylation; P:phylloquinone biosynthetic process; F:2-phytyl-14-naphthoquinone methyltransferase activity; C:chloroplast	EC:2.1.1	Transferring one-carbon groups
[INTERPRO BLASTED MAPPED ANNOTATED]	NP_001351681.1	caffeoyl-CoA O-methyltransferase	TRUE	247	20	0	98.95	4	P:GO:0009809; P:GO:0032259; F:GO:0042409; F:GO:0046872	P:lignin biosynthetic process; P:methylation; F:caffeoyl-CoA O-methyltransferase activity; F:metal ion binding	EC:2.1.1.104	CHR ffeoyl-CoA O-methyltransferase
[INTERPRO BLASTED MAPPED ANNOTATED]	XP_004499918.1	cycloartenol-C-24-methyltransferase	TRUE	340	20	0	95.82	6	P:GO:0009793; P:GO:0016126; P:GO:0032259; F:GO:0003838; C:GO:0005783; C:GO:0016020	P:embryo development ending in seed dormancy; P:sterol biosynthetic process; P:methylation; F:sterol 24-C-methyltransferase activity; C:endoplasmic reticulum; C:membrane	EC:2.1.1.41	Sterol 24-C-methyltransferase
[INTERPRO BLASTED MAPPED ANNOTATED]	XP_004504352.1	methyltransferase-like protein 13 isoform X1 [Cicer arietinum]	TRUE	769	20	0	91.54	4	P:GO:0032259; P:GO:0071704; F:GO:0004222; F:GO:0008168	P:methylation; P:organic substance metabolic process; F:metalloendopeptidase activity; F:methyltransferase activity	EC:3.4.24; EC:2.1.1	Acting on peptide bonds (peptidases); Transferring one-carbon groups
[INTERPRO BLASTED MAPPED ANNOTATED]	XP_004506744.1	EEF1A lysine methyltransferase 3	TRUE	250	20	0	91.09	2	P:GO:0032259; F:GO:0008168	P:methylation; F:methyltransferase activity	EC:2.1.1	Transferring one-carbon groups
[INTERPRO BLASTED MAPPED ANNOTATED]	XP_004504753.1	flavonoid 3'5'-methyltransferase-like	TRUE	229	20	1.26719e-167	92.08	3	P:GO:0032259; F:GO:0033799; F:GO:0070448	P:methylation; F:myricetin 3'-O-methyltransferase activity; F:laricitrin 5'-O-methyltransferase activity	EC:2.1.1.267	Flavonoid 3'5'-methyltransferase
[INTERPRO BLASTED MAPPED ANNOTATED]	XP_004489174.1	histidine protein methyltransferase 1 homolog isoform X1	TRUE	312	20	0	89.2	2	P:GO:0032259; F:GO:0008168	P:methylation; F:methyltransferase activity	EC:2.1.1	Transferring one-carbon groups
[INTERPRO BLASTED MAPPED ANNOTATED]	XP_004492936.1	leucine carboxyl methyltransferase 1 homolog isoform X1	TRUE	331	20	0	95.85	4	P:GO:0032259; F:GO:0008168; C:GO:0005737; C:GO:0016020	P:methylation; F:methyltransferase activity; C:cytoplasm; C:membrane	EC:2.1.1	Transferring one-carbon groups
[INTERPRO BLASTED MAPPED ANNOTATED]	XP_004485405.1	methionine S-methyltransferase isoform X1 [Cicer arietinum]	TRUE	1093	20	0	96.42	6	P:GO:0006807; P:GO:0009058; P:GO:0032259; P:GO:0071704; F:GO:0030170; F:GO:0030732	P:nitrogen compound metabolic process; P:biosynthetic process; P:methylation; P:organic substance metabolic process; F:pyridoxal phosphate binding; F:methionine S-methyltransferase activity	EC:2.1.1.12	Methionine S-methyltransferase
[INTERPRO BLASTED MAPPED ANNOTATED]	XP_004498868.1	Methyltransferase-like protein 6	TRUE	565	20	0	93.02	2	P:GO:0030488; F:GO:0008168	P:tRNA methylation; F:methyltransferase activity	EC:2.1.1	Transferring one-carbon groups
[INTERPRO BLASTED MAPPED ANNOTATED]	XP_004515076.1	mRNA cap guanine-N7 methyltransferase 1	TRUE	372	20	0	97.65	6	P:GO:0006370; P:GO:0106005; F:GO:0003723; F:GO:0004482; C:GO:0005634; C:GO:0005845	P:7-methylguanosine mRNA capping; P:RNA 5'-cap (guanine-N7)-methylation; F:RNA binding; F:mRNA (guanine-N7-)-methyltransferase activity; C:nucleus; C:mRNA cap binding complex	EC:2.1.1.56	mRNA (guanine-N(7)-)-methyltransferase
[INTERPRO BLASTED MAPPED ANNOTATED]	XP_004502631.1	mRNA cap guanine-N7 methyltransferase 2	TRUE	360	20	0	91.02	7	P:GO:0006370; P:GO:0106005; F:GO:0003723; F:GO:0004482; C:GO:0005634; C:GO:0005845; C:GO:0016020	P:7-methylguanosine mRNA capping; P:RNA 5'-cap (guanine-N7)-methylation; F:RNA binding; F:mRNA (guanine-N7-)-methyltransferase activity; C:nucleus; C:mRNA cap binding complex; C:membrane	EC:2.1.1.56	mRNA (guanine-N(7)-)-methyltransferase
[INTERPRO BLASTED MAPPED ANNOTATED]	XP_004516664.1	uncharacterized protein LOC101504483 [Cicer arietinum]	TRUE	668	20	0	90.01	9	P:GO:0006094; P:GO:0006096; P:GO:0016310; P:GO:0106004; F:GO:0004618; F:GO:0005524; F:GO:0008176; F:GO:0043531; C:GO:0005829	P:gluconeogenesis; P:glycolytic process; P:phosphorylation; P:tRNA (guanine-N7)-methylation; F:phosphoglycerate kinase activity; F:ATP binding; F:tRNA (guanine-N7-)-methyltransferase activity; F:ADP binding; C:cytosol	EC:2.7.2.3; EC:2.1.1.33	Phosphoglycerate kinase; tRNA (guanine(46)-N(7))-methyltransferase
[INTERPRO BLASTED MAPPED ANNOTATED]	XP_004504712.1	probable methyltransferase At1g29790	TRUE	390	20	0	94.23	3	P:GO:0032259; F:GO:0008168; C:GO:0016020	P:methylation; F:methyltransferase activity; C:membrane	EC:2.1.1	Transferring one-carbon groups
[INTERPRO BLASTED MAPPED ANNOTATED]	XP_004491518.1	probable ribosomal RNA small subunit methyltransferase B	TRUE	531	20	0	94.32	7	P:GO:0000470; P:GO:0006355; P:GO:0070475; F:GO:0003723; F:GO:0009383; C:GO:0005730; C:GO:0005737	P:maturation of LSU-rRNA; P:regulation of DNA-templated transcription; P:rRNA base methylation; F:RNA binding; F:rRNA (cytosine-C5-)-methyltransferase activity; C:nucleolus; C:cytoplasm	EC:2.1.1	Transferring one-carbon groups
[INTERPRO BLASTED MAPPED ANNOTATED]	XP_012573264.1	protein arginine methyltransferase NDUFAF7 homolog mitochondrial-like isoform X1	TRUE	448	20	0	92.9	4	P:GO:0006479; P:GO:0032981; F:GO:0035243; C:GO:0005739	P:protein methylation; P:mitochondrial respiratory chain complex I assembly; F:protein-arginine omega-N symmetric methyltransferase activity; C:mitochondrion	EC:2.1.1.320	Type II protein arginine methyltransferase
[INTERPRO BLASTED MAPPED ANNOTATED]	XP_004515598.1	protein arginine N-methyltransferase PRMT10	TRUE	373	20	0	94.38	2	P:GO:0018216; F:GO:0016274	P:peptidyl-arginine methylation; F:protein-arginine N-methyltransferase activity	EC:2.1.1	Transferring one-carbon groups
[INTERPRO BLASTED MAPPED ANNOTATED]	XP_004516997.1	protein ENHANCED DOWNY MILDEW 2-like isoform X1 [Cicer arietinum]	TRUE	952	20	0	85.12	2	F:GO:0046872; C:GO:0005634	F:metal ion binding; C:nucleus
[INTERPRO BLASTED MAPPED ANNOTATED]	XP_004506058.1	protein N-lysine methyltransferase METTL21A	TRUE	304	20	0	93.81	2	P:GO:0032259; F:GO:0008168	P:methylation; F:methyltransferase activity	EC:2.1.1	Transferring one-carbon groups
[INTERPRO BLASTED MAPPED ANNOTATED]	XP_004509259.1	protein N-lysine methyltransferase METTL21A	TRUE	258	20	7.28361e-170	85.96	2	P:GO:0032259; F:GO:0008168	P:methylation; F:methyltransferase activity	EC:2.1.1	Transferring one-carbon groups
[INTERPRO BLASTED MAPPED ANNOTATED]	XP_004512683.1	protein N-lysine methyltransferase METTL21A	TRUE	270	20	3.52918e-167	96.21	2	P:GO:0032259; F:GO:0008168	P:methylation; F:methyltransferase activity	EC:2.1.1	Transferring one-carbon groups
[INTERPRO BLASTED MAPPED ANNOTATED]	XP_004513963.1	protein N-lysine methyltransferase METTL21A isoform X1	TRUE	252	20	0	91.3	2	P:GO:0006479; F:GO:0008276	P:protein methylation; F:protein methyltransferase activity	EC:2.1.1	Transferring one-carbon groups
[INTERPRO BLASTED MAPPED ANNOTATED]	NP_001265927.1	Protein-L-isoaspartate O-methyltransferase 1	TRUE	284	20	0	87.44	3	P:GO:0006479; F:GO:0004719; C:GO:0005737	P:protein methylation; F:protein-L-isoaspartate (D-aspartate) O-methyltransferase activity; C:cytoplasm	EC:2.1.1.77	Protein-L-isoaspartate(D-aspartate) O-methyltransferase
[INTERPRO BLASTED MAPPED ANNOTATED]	NP_001266141.1	Protein-L-isoaspartate O-methyltransferase 1	TRUE	229	20	1.50505e-169	94.1	3	P:GO:0006479; F:GO:0004719; C:GO:0005737	P:protein methylation; F:protein-L-isoaspartate (D-aspartate) O-methyltransferase activity; C:cytoplasm	EC:2.1.1.77	Protein-L-isoaspartate(D-aspartate) O-methyltransferase
[INTERPRO BLASTED MAPPED ANNOTATED]	XP_012570542.1	protein-lysine methyltransferase METTL21D	TRUE	222	20	5.46091e-135	92.18	2	P:GO:0032259; F:GO:0008168	P:methylation; F:methyltransferase activity	EC:2.1.1	Transferring one-carbon groups
[INTERPRO BLASTED MAPPED ANNOTATED]	XP_004491318.1	putative methyltransferase NSUN6 [Cicer arietinum]	TRUE	613	20	0	89	3	P:GO:0001510; F:GO:0003723; F:GO:0008168	P:RNA methylation; F:RNA binding; F:methyltransferase activity	EC:2.1.1	Transferring one-carbon groups
[INTERPRO BLASTED MAPPED ANNOTATED]	XP_004510029.1	ribosomal protein L11 methyltransferase	TRUE	397	20	0	84.95	4	P:GO:0018023; F:GO:0016279; C:GO:0005739; C:GO:0005840	P:peptidyl-lysine trimethylation; F:protein-lysine N-methyltransferase activity; C:mitochondrion; C:ribosome	EC:2.1.1	Transferring one-carbon groups
[INTERPRO BLASTED MAPPED ANNOTATED]	XP_004510052.1	ribosomal RNA large subunit methyltransferase I-like isoform X1	TRUE	437	20	0	96.23	3	P:GO:0032259; F:GO:0003723; F:GO:0008168	P:methylation; F:RNA binding; F:methyltransferase activity	EC:2.1.1	Transferring one-carbon groups
[INTERPRO BLASTED MAPPED ANNOTATED]	XP_004512086.1	ribosomal RNA small subunit methyltransferase mitochondrial	TRUE	326	20	0	87.71	4	P:GO:0031167; F:GO:0000179; F:GO:0003723; C:GO:0005739	P:rRNA methylation; F:rRNA (adenine-N6N6-)-dimethyltransferase activity; F:RNA binding; C:mitochondrion	EC:2.1.1	Transferring one-carbon groups
[INTERPRO BLASTED MAPPED ANNOTATED]	XP_004493600.1	ribosomal RNA-processing protein 8	TRUE	272	20	0	93.04	4	P:GO:0006364; P:GO:0032259; F:GO:0008168; C:GO:0005730	P:rRNA processing; P:methylation; F:methyltransferase activity; C:nucleolus	EC:2.1.1	Transferring one-carbon groups
[INTERPRO BLASTED MAPPED ANNOTATED]	XP_004488701.1	Tricin synthase 1	TRUE	297	20	0	86.06	2	P:GO:0032259; F:GO:0042409	P:methylation; F:caffeoyl-CoA O-methyltransferase activity	EC:2.1.1.104	CHR ffeoyl-CoA O-methyltransferase
[INTERPRO BLASTED MAPPED ANNOTATED]	XP_004510156.1	tRNA (guanine-N(7)-)-methyltransferase-like	TRUE	324	20	0	94.47	3	P:GO:0106004; F:GO:0008176; C:GO:0043527	P:tRNA (guanine-N7)-methylation; F:tRNA (guanine-N7-)-methyltransferase activity; C:tRNA methyltransferase complex	EC:2.1.1.33	tRNA (guanine(46)-N(7))-methyltransferase
		AVERAGE		405.031	20	1.70653e-136	92.1403	3.65625
		MINIMUM		222	20	0	84.95	2
		MAXIMAM		1093	20	5.46091e-135	98.95	9

## Sheet:  Supplementary Table 8
	Supplementary Table 8. List miRNAs targeting methyltransferase genes with lower expectation value 3 focusing on cleavage and translation processes
miRNA Acc.	Target Acc.	Expectation	Processes	Target Description
aly-miR162a-5p	XP_004512086.1	3	Cleavage	ribosomal RNA small subunit methyltransferase, mitochondrial [Cicer arietinum]
aly-miR162b-5p	XP_004512086.1	3	Cleavage	ribosomal RNA small subunit methyltransferase, mitochondrial [Cicer arietinum]
aly-miR822-5p	NP_001265927.1	3	Cleavage	protein L-isoaspartyl methyltransferase 2 isoform 2 [Cicer arietinum]
aly-miR822-5p	NP_001266141.1	3	Cleavage	protein L-isoaspartyl methyltransferase 1 [Cicer arietinum]
ath-miR837-5p	XP_004516664.1	3	Cleavage	uncharacterized protein LOC101504483 [Cicer arietinum]
bra-miR162-5p	XP_004512086.1	3	Cleavage	ribosomal RNA small subunit methyltransferase, mitochondrial [Cicer arietinum]
cca-miR6110-3p	XP_004515598.1	3	Cleavage	protein arginine N-methyltransferase PRMT10 [Cicer arietinum]
cre-miR1144a.1	XP_004510029.1	3	Cleavage	uncharacterized protein LOC101496374 isoform X2 [Cicer arietinum]
esi-miR3463-3p	XP_004516997.1	3	Translation	protein ENHANCED DOWNY MILDEW 2-like isoform X1 [Cicer arietinum]
gma-miR9725	XP_004510052.1	3	Cleavage	uncharacterized protein LOC101504427 isoform X1 [Cicer arietinum]
gra-miR167a	XP_004498868.1	3	Cleavage	uncharacterized protein LOC101498279 isoform X1 [Cicer arietinum]
gra-miR167b	XP_004498868.1	3	Cleavage	uncharacterized protein LOC101498279 isoform X1 [Cicer arietinum]
mtr-miR169d-3p	XP_004498868.1	3	Cleavage	uncharacterized protein LOC101498279 isoform X1 [Cicer arietinum]
mtr-miR169e-3p	XP_004498868.1	3	Cleavage	uncharacterized protein LOC101498279 isoform X1 [Cicer arietinum]
osa-miR2863a	XP_004513963.1	3	Cleavage	protein N-lysine methyltransferase METTL21A isoform X1 [Cicer arietinum]
osa-miR2863a	XP_004498868.1	3	Cleavage	uncharacterized protein LOC101498279 isoform X1 [Cicer arietinum]
sbi-miR5564c-5p	XP_004492936.1	3	Cleavage	leucine carboxyl methyltransferase 1 homolog [Cicer arietinum]
stu-miR162a-5p	XP_004512086.1	3	Cleavage	ribosomal RNA small subunit methyltransferase, mitochondrial [Cicer arietinum]
stu-miR162b-5p	XP_004512086.1	3	Cleavage	ribosomal RNA small subunit methyltransferase, mitochondrial [Cicer arietinum]
tae-miR530	XP_004504712.1	3	Cleavage	uncharacterized protein LOC101498967 [Cicer arietinum]
